# Supplementary material for: A theoretical study on π-stacking and ferromagnetism of the perylene diimide radical anion dimer and tetramer
Source: Royal Society of Chemistry journal article supplement (doi:10.1039/d3cp02496b), 2023-01-01
Supplement: d3cp02496b1.pdf [file d3cp02496b1.pdf]

## Supporting Information for:

### A theoretical study on $\pi$ -stacking and ferromagnetism of perylene diimide radical anion dimer

Hanlin Gan<sup>a</sup>, Qinglin Jiang<sup>a</sup>, and Yuguang Ma<sup>\*ab</sup>

<sup>a</sup> *State Key Laboratory of Luminescent Materials and Devices, South  
China University of Technology, Guangzhou 510640, China;*

<sup>b</sup> *Guangdong Provincial Key Laboratory of Luminescence from  
Molecular Aggregates, South China University of Technology,  
Guangzhou 510640, China.*

Email: ygma@scut.edu.cn

|                                                                                         |    |
|-----------------------------------------------------------------------------------------|----|
| Section 1: Optimized structure, spin density and Kohn-Sham orbitals of PDI <sup>-</sup> | S2 |
| Section 2: Vibrational modes of imaginary frequency of <b>2</b> and <b>13</b>           | S3 |
| Section 3: SS-CASSCF(6,6) molecular orbital, spin density and FOD of <b>1</b>           | S4 |
| Section 4: SS-CASSCF(6,6) molecular orbital, spin density and FOD of <b>12</b>          | S5 |
| Section 5: SS-CASSCF(6,6) molecular orbital, spin density and FOD of <b>12-1</b>        | S6 |
| Section 6: Gibbs free energy difference between the dimers                              | S7 |
| Section 7: References                                                                   | S8 |
| Section 8: Cartesian coordinates of different stacked geometries                        | S9 |

Section 1:

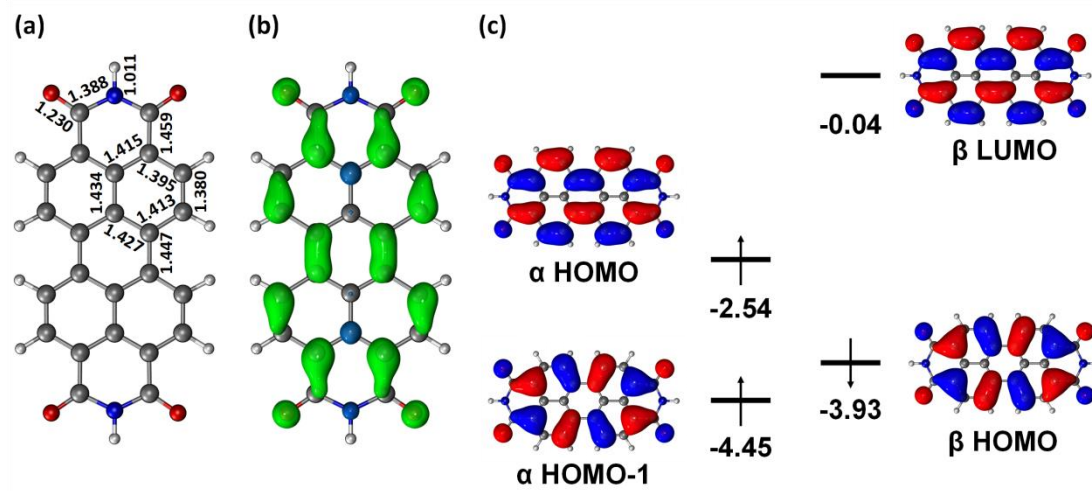

Fig. S1: (a) Optimized structure (Å), (b) spin density distribution maps (isovalue=0.002 a.u.), and (c) KS orbitals (eV, isovalue=0.020 a.u.) of PDI<sup>-</sup> at UM05-2X/6-31+G(d) theoretical level.

**Section 2:**

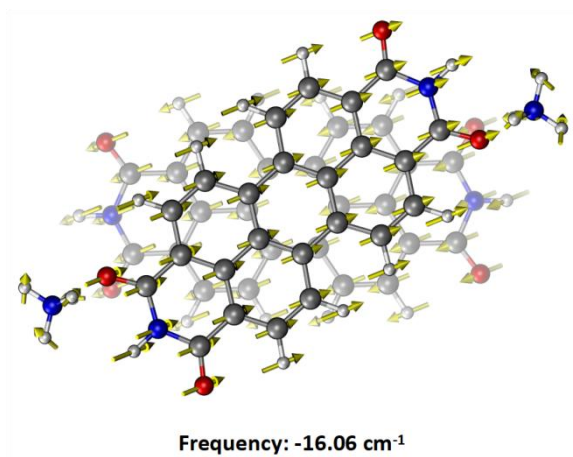

Fig. S2: Vibrational mode of the imaginary frequency of pimer 2.

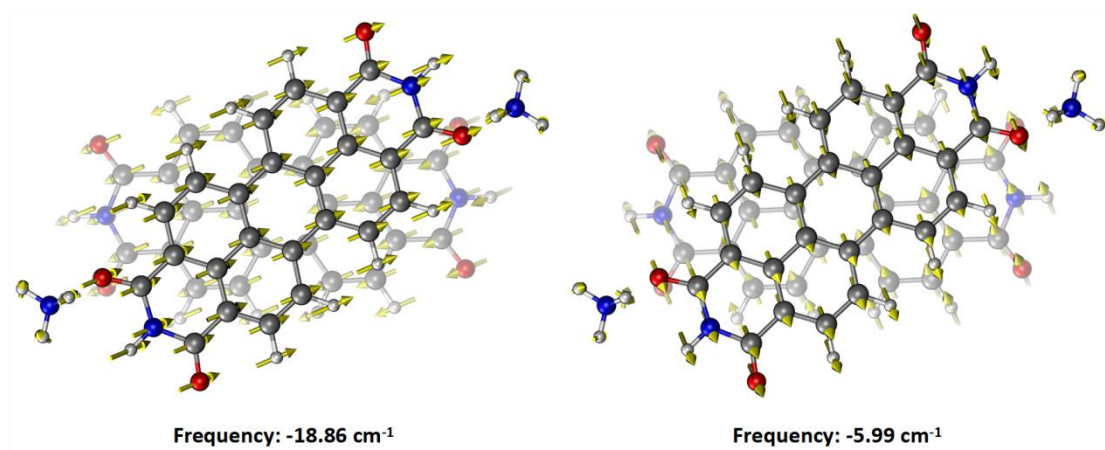

Fig. S3: Vibrational mode of the imaginary frequency of pimer 13.

### Section 3:

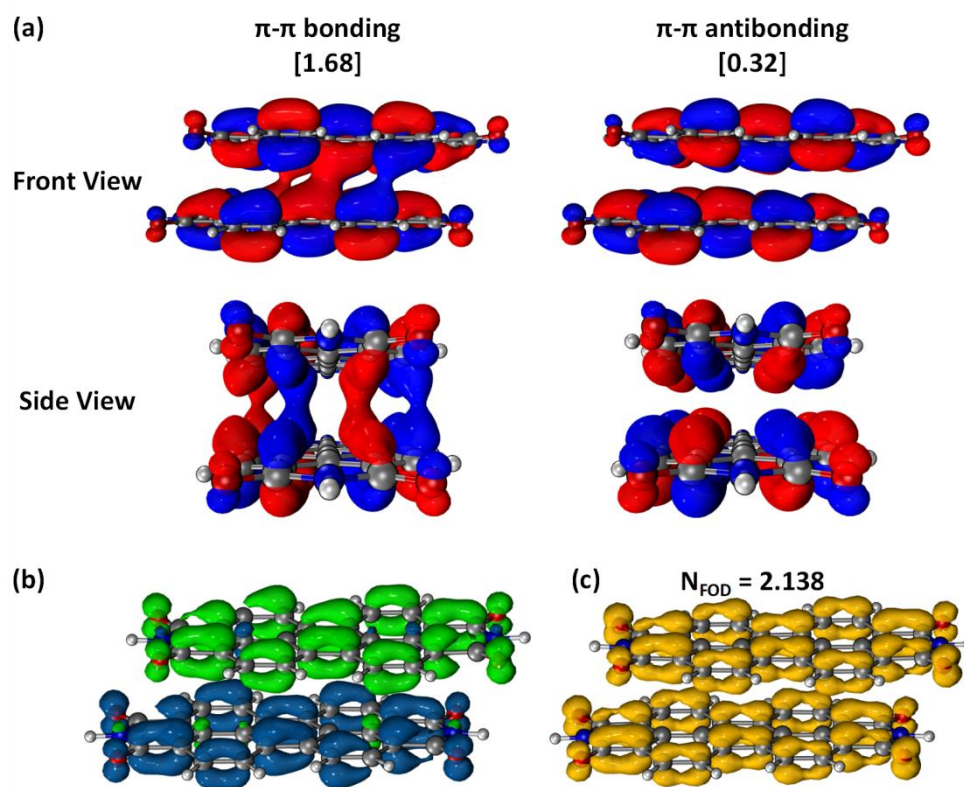

Fig. S4: (a) SS-CASSCF/jul-cc-pV(D+d)Z molecular orbitals included in the active space (6e, 6o, values in square brackets are occupation numbers, isovalue=0.020 a.u.), (b) U-DFT spin density representation (isovalue=0.002 a.u.), and (c) FOD (isovalue=0.002 a.u.) and  $N_{\text{FOD}}$  for pimer 1. Ammoniums are omitted for clarity.

#### Section 4:

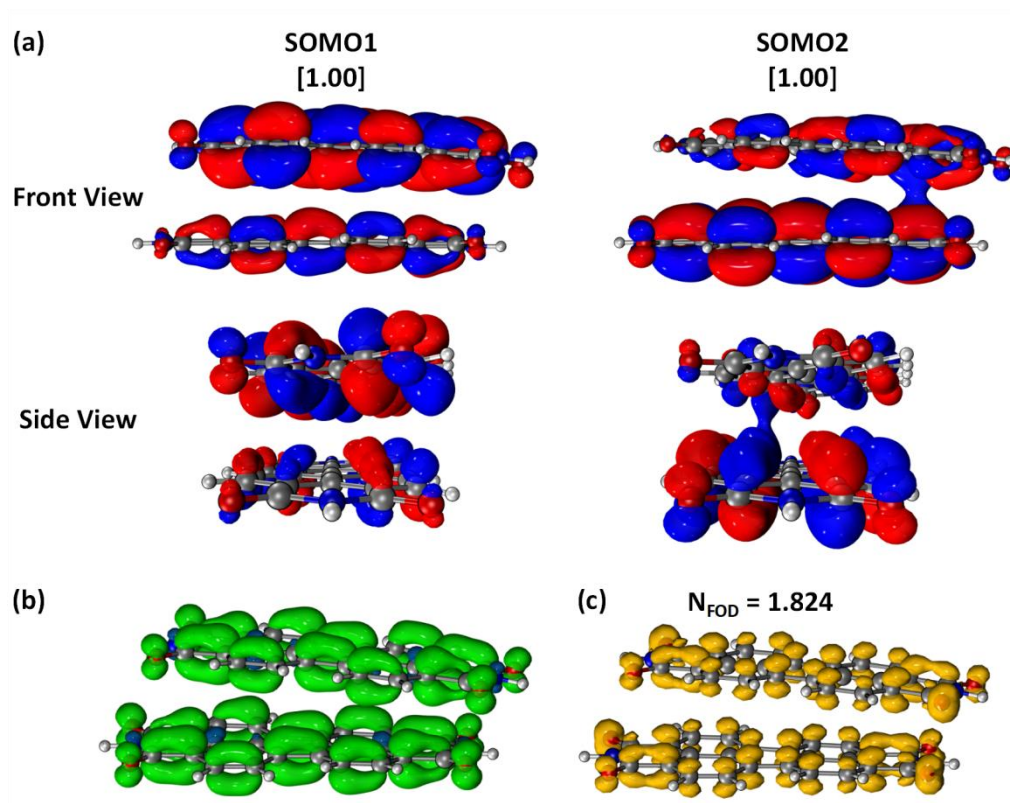

Fig. S5: (a) SS-CASSCF/jul-cc-pV(D+d)Z molecular orbitals included in the active space (6e, 6o, values in square brackets are occupation numbers, isovalue=0.020 a.u.), (b) U-DFT spin density representation (isovalue=0.002 a.u.), and (c) FOD (isovalue=0.002 a.u.) and  $N_{\text{FOD}}$  for pimer 12. Ammoniums are omitted for clarity.

Section 5:

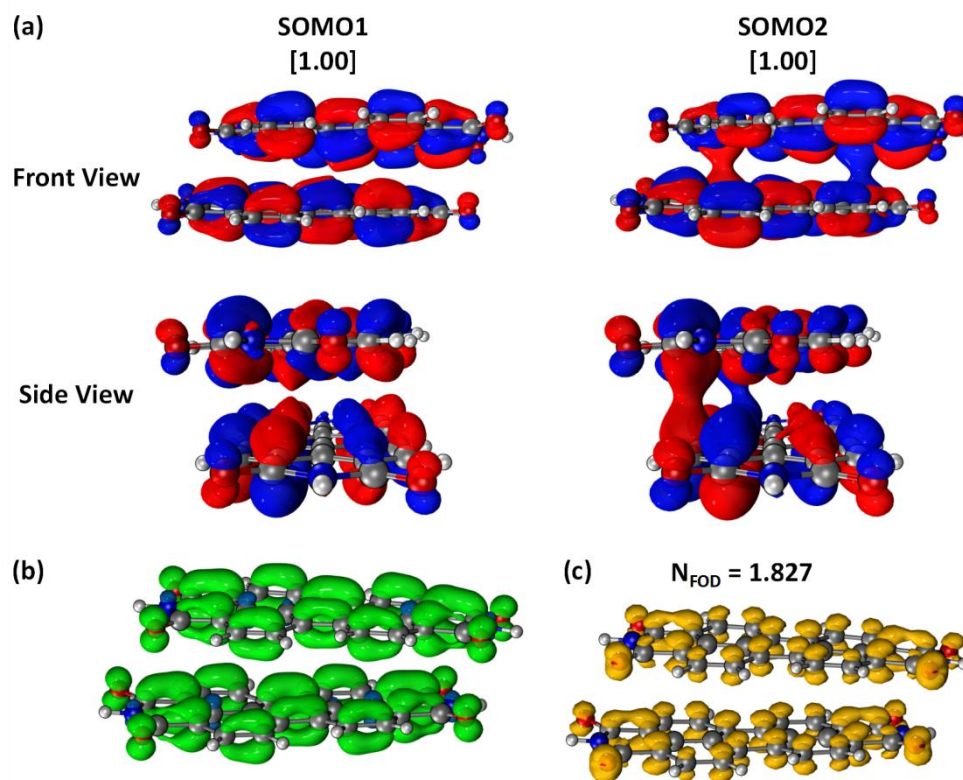

Fig. S6: (a) SS-CASSCF/jul-cc-pV(D+d)Z molecular orbitals included in the active space (6e, 6o, values in square brackets are occupation numbers, isovalue=0.020 a.u.), (b) U-DFT spin density representation (isovalue=0.002 a.u.), and (c) FOD (isovalue=0.002 a.u.) and  $N_{\text{FOD}}$  for pimer **12-1**. Ammoniums are omitted for clarity.

## Section 6:

In addition to the total energy differences between pimers discussed in the text, the differences in Gibbs free energy between them are also listed in Table S1. The Gibbs free energy is given as:

$$G = E_{\text{elec}} + G_{\text{corr}}$$

where  $E_{\text{elec}}$  is the single-point energy calculated at B2GP-PLYP-D4/jul-cc-pV(D+d)Z level on geometries optimized at UM05-2X/6-31+G(d) level and  $G_{\text{corr}}$  is the thermal correction to Gibbs free energy at 298.15 K and 1 atm state evaluated by vibrational frequency calculation on the optimized structures. In order to better deal with low vibrational frequencies, Grimme's entropy interpolation between harmonic and free-rotor approximations was applied<sup>1,2</sup>.

Table S1: Gibbs free energy difference between the pimers

| Pimer | $\Delta G$ (kcal/mol) |
|-------|-----------------------|
| 1     | 0.2                   |
| 1-1   | 0.0                   |
| 1-2   | +20.9                 |
| 3     | +5.9                  |
| 3-1   | +3.3                  |
| 4     | +2.9                  |
| 5     | +9.4                  |
| 5-1   | +10.0                 |
| 6     | +5.6                  |
| 7     | +19.1                 |
| 8     | +23.7                 |
| 9     | +21.9                 |
| 10    | +29.6                 |
| 11    | +23.9                 |
| 12    | +2.8                  |
| 12-1  | +2.3                  |
| 12-2  | +5.7                  |
| 12-3  | +20.2                 |
| 12-4  | +20.0                 |
| 14    | +5.7                  |
| 14-1  | +4.9                  |
| 15    | +7.8                  |
| 16    | +13.5                 |
| 16-1  | +10.4                 |
| 17    | +6.3                  |
| 18    | +5.8                  |
| 19    | +22.2                 |

|           |       |
|-----------|-------|
| <b>20</b> | +26.2 |
| <b>21</b> | +23.9 |
| <b>22</b> | +27.6 |
| <b>23</b> | +23.7 |

---

### **Section 7:**

#### References

- 1 S. Grimme, *Chem. Eur. J.*, 2012, **18**, 9955-9964.
- 2 T. Lu and Q. Chen, *Comput. Theor. Chem.*, 2021, **1200**, 113249.



## Section 8:

Cartesian coordinates of different pimers on LS state PES

Cartesian coordinates of pimer 1

|   |           |           |          |
|---|-----------|-----------|----------|
| C | -0.614888 | -0.059038 | 1.690875 |
| C | -2.035894 | 0.078608  | 1.790921 |
| C | 0.201867  | 1.110448  | 1.734553 |
| C | -0.417636 | 2.373691  | 1.856537 |
| C | -0.045175 | -1.358253 | 1.556735 |
| C | -2.604097 | 1.362877  | 1.919047 |
| C | -2.854237 | -1.080013 | 1.77325  |
| C | 1.63699   | 0.969259  | 1.66553  |
| C | -1.78848  | 2.496429  | 1.943602 |
| H | 0.177808  | 3.27383   | 1.872346 |
| C | -0.902363 | -2.483505 | 1.550646 |
| C | 1.390564  | -1.494776 | 1.447565 |
| C | -4.047378 | 1.523134  | 2.031316 |
| C | -4.28363  | -0.945476 | 1.905981 |
| C | -2.268587 | -2.345935 | 1.659215 |
| C | 2.499056  | 2.084587  | 1.782034 |
| C | 2.207287  | -0.327    | 1.503482 |
| H | -2.261605 | 3.46567   | 2.035267 |
| H | -0.492305 | -3.478481 | 1.471202 |
| C | 2.010487  | -2.752682 | 1.290764 |
| O | -4.642409 | 2.583524  | 2.15784  |
| N | -4.774685 | 0.326531  | 2.00352  |
| O | -5.090277 | -1.906028 | 1.963337 |
| H | -2.908321 | -3.218899 | 1.673638 |
| H | 2.092061  | 3.066706  | 1.966701 |
| C | 3.866358  | 1.94716   | 1.7033   |
| C | 3.628506  | -0.463132 | 1.408625 |
| H | 1.41374   | -3.649814 | 1.232564 |
| C | 3.382377  | -2.877429 | 1.205628 |
| C | 4.450512  | 0.693221  | 1.483692 |
| H | 4.505871  | 2.808009  | 1.853967 |
| C | 4.196752  | -1.745933 | 1.263107 |
| H | 3.854173  | -3.843559 | 1.082859 |
| C | 5.884447  | 0.555884  | 1.395177 |
| C | 5.647469  | -1.908465 | 1.217319 |
| N | 6.374953  | -0.710373 | 1.267485 |
| O | 6.700155  | 1.51278   | 1.429176 |
| O | 6.248378  | -2.967151 | 1.150673 |
| H | -5.775583 | 0.423031  | 2.117737 |
| H | 7.381923  | -0.808536 | 1.238032 |

|   |           |           |           |
|---|-----------|-----------|-----------|
| N | -6.296234 | -3.492201 | 0.242937  |
| H | -5.815543 | -4.319553 | -0.098865 |
| H | -5.712017 | -2.976588 | 0.958844  |
| H | -6.466978 | -2.782538 | -0.541642 |
| H | -7.18354  | -3.759013 | 0.663203  |
| C | 0.61426   | 0.058783  | -1.691251 |
| C | 2.035231  | -0.079136 | -1.791305 |
| C | -0.202708 | -1.110548 | -1.734898 |
| C | 0.41654   | -2.37393  | -1.856623 |
| C | 0.04479   | 1.358108  | -1.557047 |
| C | 2.603186  | -1.363539 | -1.919315 |
| C | 2.853793  | 1.079314  | -1.773551 |
| C | -1.637815 | -0.969069 | -1.666082 |
| C | 1.787372  | -2.496937 | -1.943674 |
| H | -0.179091 | -3.273953 | -1.872106 |
| C | 0.902167  | 2.483179  | -1.55111  |
| C | -1.390927 | 1.494865  | -1.447577 |
| C | 4.046466  | -1.52409  | -2.031333 |
| C | 4.283289  | 0.944485  | -1.905633 |
| C | 2.268397  | 2.345322  | -1.65959  |
| C | -2.500094 | -2.084137 | -1.783362 |
| C | -2.207866 | 0.32725   | -1.503663 |
| H | 2.260323  | -3.466285 | -2.035107 |
| H | 0.492304  | 3.478243  | -1.47172  |
| C | -2.010596 | 2.752822  | -1.290366 |
| O | 4.641274  | -2.584625 | -2.157712 |
| N | 4.774027  | -0.327672 | -2.003364 |
| O | 5.090192  | 1.904737  | -1.961834 |
| H | 2.90831   | 3.218155  | -1.673899 |
| H | -2.093281 | -3.066182 | -1.968841 |
| C | -3.867385 | -1.946447 | -1.704673 |
| C | -3.629052 | 0.46362   | -1.408729 |
| H | -1.413677 | 3.649831  | -1.231995 |
| C | -3.382472 | 2.877797  | -1.205041 |
| C | -4.45129  | -0.69253  | -1.48429  |
| H | -4.507068 | -2.807014 | -1.856229 |
| C | -4.197051 | 1.746488  | -1.262786 |
| H | -3.854082 | 3.843979  | -1.081961 |
| C | -5.885254 | -0.554947 | -1.395784 |
| C | -5.647764 | 1.909299  | -1.216973 |
| N | -6.375493 | 0.711419  | -1.267708 |
| O | -6.701068 | -1.511653 | -1.429933 |
| O | -6.248397 | 2.968118  | -1.149991 |
| H | 5.774976  | -0.424434 | -2.116882 |

|   |           |          |           |
|---|-----------|----------|-----------|
| H | -7.382442 | 0.80975  | -1.238145 |
| N | 6.298739  | 3.492864 | -0.244048 |
| H | 6.467969  | 2.782231 | 0.540349  |
| H | 7.186595  | 3.757841 | -0.664298 |
| H | 5.713365  | 2.978867 | -0.959664 |
| H | 5.819967  | 4.321129 | 0.098251  |

---

| $E_{\text{elec}}$ (a.u.) | $ZPE$ (a.u.) | $G_{\text{corr}}$ (a.u.) |          |
|--------------------------|--------------|--------------------------|----------|
|                          | -2773.790385 | 0.683944                 | 0.614702 |

---

Cartesian coordinates of pimer **1-1**

|   |           |           |           |
|---|-----------|-----------|-----------|
| C | -0.632606 | -0.026851 | -1.690156 |
| C | -2.046701 | 0.170726  | -1.787884 |
| C | 0.232251  | 1.104378  | -1.718915 |
| C | -0.329844 | 2.392945  | -1.825242 |
| C | -0.117876 | -1.353828 | -1.572949 |
| C | -2.558222 | 1.479176  | -1.889722 |
| C | -2.916366 | -0.952976 | -1.795587 |
| C | 1.667046  | 0.903352  | -1.644291 |
| C | -1.695789 | 2.576404  | -1.901627 |
| H | 0.305741  | 3.264897  | -1.842242 |
| C | -1.024896 | -2.441826 | -1.589414 |
| C | 1.304903  | -1.550342 | -1.468262 |
| C | -3.995603 | 1.704306  | -1.987832 |
| C | -4.335623 | -0.753099 | -1.929962 |
| C | -2.381722 | -2.244457 | -1.704266 |
| C | 2.573156  | 1.981084  | -1.709063 |
| C | 2.176174  | -0.418674 | -1.503584 |
| H | -2.126166 | 3.566558  | -1.979055 |
| H | -0.660163 | -3.455275 | -1.520511 |
| C | 1.872116  | -2.841525 | -1.357349 |
| O | -4.542638 | 2.792983  | -2.074526 |
| N | -4.772539 | 0.540121  | -1.995126 |
| O | -5.190489 | -1.672304 | -2.014606 |
| H | -3.053834 | -3.092446 | -1.740573 |
| H | 2.210918  | 2.990651  | -1.826021 |
| C | 3.938162  | 1.783821  | -1.632169 |
| C | 3.589634  | -0.615436 | -1.41053  |
| H | 1.237714  | -3.714449 | -1.359537 |
| C | 3.23392   | -3.025433 | -1.272841 |
| C | 4.453707  | 0.497464  | -1.477564 |
| H | 4.630569  | 2.61419   | -1.676734 |

|   |           |           |           |
|---|-----------|-----------|-----------|
| C | 4.107659  | -1.931433 | -1.271649 |
| H | 3.644762  | -4.027347 | -1.248072 |
| C | 5.902697  | 0.308745  | -1.431734 |
| C | 5.534625  | -2.13388  | -1.187759 |
| N | 6.319167  | -1.020558 | -1.272094 |
| O | 6.742     | 1.187776  | -1.524941 |
| O | 6.090363  | -3.251618 | -1.043997 |
| H | -5.769661 | 0.680686  | -2.097499 |
| H | 7.320488  | -1.165175 | -1.242166 |
| N | -6.108714 | -3.530713 | -0.430197 |
| H | -5.533983 | -4.333773 | -0.191855 |
| H | -5.611556 | -2.882814 | -1.115826 |
| H | -6.308781 | -2.925891 | 0.425785  |
| H | -6.985209 | -3.843561 | -0.841296 |
| C | 0.663847  | 0.096216  | 1.690833  |
| C | 2.089752  | 0.011489  | 1.779376  |
| C | -0.11445  | -1.09869  | 1.769868  |
| C | 0.549976  | -2.334097 | 1.967624  |
| C | 0.05042   | 1.371993  | 1.533322  |
| C | 2.71004   | -1.252171 | 1.973206  |
| C | 2.860952  | 1.186681  | 1.687996  |
| C | -1.548821 | -1.012324 | 1.674096  |
| C | 1.920029  | -2.404561 | 2.072883  |
| H | -0.015676 | -3.2495   | 2.050187  |
| C | 0.867123  | 2.518307  | 1.450845  |
| C | -1.396176 | 1.461177  | 1.46911   |
| C | 4.142055  | -1.330195 | 2.097698  |
| C | 4.315263  | 1.123783  | 1.7729    |
| C | 2.242686  | 2.426408  | 1.519141  |
| C | -2.37106  | -2.160968 | 1.750878  |
| C | -2.168432 | 0.266319  | 1.52428   |
| H | 2.403887  | -3.356656 | 2.250538  |
| H | 0.425283  | 3.494754  | 1.325277  |
| C | -2.060687 | 2.699122  | 1.356111  |
| O | 4.790834  | -2.381494 | 2.336301  |
| N | 4.836477  | -0.16019  | 1.970117  |
| O | 5.075699  | 2.076941  | 1.700793  |
| H | 2.868614  | 3.306934  | 1.451584  |
| H | -1.930224 | -3.135409 | 1.894039  |
| C | -3.742862 | -2.071567 | 1.675333  |
| C | -3.593586 | 0.352558  | 1.442423  |
| H | -1.497411 | 3.618666  | 1.321875  |
| C | -3.438282 | 2.777375  | 1.292344  |
| C | -4.373277 | -0.834331 | 1.497229  |

|   |           |           |          |
|---|-----------|-----------|----------|
| H | -4.35094  | -2.959791 | 1.795941 |
| C | -4.209669 | 1.616297  | 1.328925 |
| H | -3.944744 | 3.72928   | 1.201022 |
| C | -5.81264  | -0.749515 | 1.425107 |
| C | -5.667089 | 1.724854  | 1.293756 |
| N | -6.350502 | 0.50113   | 1.331636 |
| O | -6.588017 | -1.73812  | 1.442062 |
| O | -6.306197 | 2.761565  | 1.242452 |
| H | 5.842743  | -0.213472 | 2.065452 |
| H | -7.360553 | 0.562618  | 1.309756 |
| N | 5.282774  | -4.606828 | 1.066858 |
| H | 5.589799  | -4.192242 | 0.132888 |
| H | 4.551923  | -5.301535 | 0.943342 |
| H | 4.939658  | -3.774253 | 1.63807  |
| H | 6.08248   | -5.026675 | 1.535178 |

---

| $E_{\text{elec}}$ (a.u.) | $ZPE$ (a.u.) | $G_{\text{corr}}$ (a.u.) |          |
|--------------------------|--------------|--------------------------|----------|
|                          | -2773.790332 | 0.683572                 | 0.614387 |

---

Cartesian coordinates of pimer 1-2

|   |           |           |           |
|---|-----------|-----------|-----------|
| C | 0.287562  | -0.001772 | -1.70545  |
| C | 1.715743  | -0.001094 | -1.837227 |
| C | -0.409181 | 1.240282  | -1.649832 |
| C | 0.331109  | 2.448838  | -1.730669 |
| C | -0.407716 | -1.244518 | -1.64677  |
| C | 2.408956  | 1.231952  | -1.913678 |
| C | 2.410325  | -1.233546 | -1.911532 |
| C | -1.848988 | 1.241783  | -1.528125 |
| C | 1.69429   | 2.447426  | -1.861    |
| H | -0.181187 | 3.398176  | -1.699789 |
| C | 0.333839  | -2.452401 | -1.725959 |
| C | -1.847416 | -1.247423 | -1.524023 |
| C | 3.826185  | 1.23375   | -2.082813 |
| C | 3.827459  | -1.233985 | -2.080792 |
| C | 1.696954  | -2.449703 | -1.856825 |
| C | -2.593642 | 2.435319  | -1.469108 |
| C | -2.542086 | -0.003158 | -1.461821 |
| H | 2.242934  | 3.376466  | -1.944439 |
| H | -0.177449 | -3.402239 | -1.69382  |
| C | -2.590444 | -2.44172  | -1.460085 |
| O | 4.559829  | 2.251161  | -2.203714 |
| N | 4.432618  | 0.000081  | -2.146836 |

|   |           |           |           |
|---|-----------|-----------|-----------|
| O | 4.562261  | -2.25086  | -2.200231 |
| H | 2.246453  | -3.37833  | -1.939249 |
| H | -2.09599  | 3.391816  | -1.514419 |
| C | -3.975119 | 2.426271  | -1.346058 |
| C | -3.963547 | -0.003865 | -1.332829 |
| H | -2.091458 | -3.397719 | -1.501019 |
| C | -3.971928 | -2.434041 | -1.337181 |
| C | -4.662932 | 1.224118  | -1.274357 |
| H | -4.54065  | 3.347306  | -1.291367 |
| C | -4.661322 | -1.232541 | -1.27021  |
| H | -4.536266 | -3.355594 | -1.279034 |
| C | -6.133145 | 1.241235  | -1.168197 |
| C | -6.131565 | -1.251368 | -1.164595 |
| N | -6.737145 | -0.00528  | -1.079652 |
| O | -6.808623 | 2.256228  | -1.167301 |
| O | -6.805739 | -2.267198 | -1.161044 |
| H | 5.432549  | 0.000464  | -2.300547 |
| H | -7.748337 | -0.0059   | -1.038426 |
| N | 5.567131  | -4.037531 | -0.564343 |
| H | 4.982272  | -4.814143 | -0.268471 |
| H | 5.045519  | -3.400697 | -1.238014 |
| H | 5.842077  | -3.42055  | 0.263594  |
| H | 6.403031  | -4.394547 | -1.021374 |
| C | -0.895563 | 0.003815  | 1.751596  |
| C | -2.318847 | 0.005075  | 1.865515  |
| C | -0.201322 | -1.241493 | 1.699521  |
| C | -0.94555  | -2.435204 | 1.758548  |
| C | -0.199522 | 1.247929  | 1.69542   |
| C | -3.018992 | -1.221088 | 1.926847  |
| C | -3.017164 | 1.23247   | 1.922202  |
| C | 1.240194  | -1.238974 | 1.596466  |
| C | -2.327814 | -2.422485 | 1.870781  |
| H | -0.449223 | -3.392455 | 1.708931  |
| C | -0.942026 | 2.442959  | 1.749401  |
| C | 1.242008  | 1.243044  | 1.593555  |
| C | -4.485793 | -1.238868 | 2.044619  |
| C | -4.483909 | 1.25286   | 2.039873  |
| C | -2.324296 | 2.432682  | 1.861439  |
| C | 1.986512  | -2.445184 | 1.59908   |
| C | 1.938289  | 0.001464  | 1.532898  |
| H | -2.894384 | -3.3439   | 1.912431  |
| H | -0.444249 | 3.399242  | 1.695841  |
| C | 1.990115  | 2.44819   | 1.594701  |
| O | -5.154541 | -2.257168 | 2.124897  |

|   |           |           |           |
|---|-----------|-----------|-----------|
| N | -5.095494 | 0.007538  | 2.068914  |
| O | -5.15103  | 2.272503  | 2.116397  |
| H | -2.889572 | 3.355051  | 1.899287  |
| H | 1.477923  | -3.391873 | 1.696964  |
| C | 3.353325  | -2.444191 | 1.516901  |
| C | 3.369851  | 0.000344  | 1.436198  |
| H | 1.482878  | 3.395722  | 1.691468  |
| C | 3.356924  | 2.445097  | 1.513038  |
| C | 4.06859   | -1.231906 | 1.407268  |
| H | 3.903187  | -3.373674 | 1.59015   |
| C | 4.07047   | 1.231592  | 1.405284  |
| H | 3.9081    | 3.373854  | 1.585527  |
| C | 5.496621  | -1.234169 | 1.324778  |
| C | 5.498388  | 1.231511  | 1.323024  |
| N | 6.107636  | -0.00176  | 1.299953  |
| O | 6.232519  | -2.255067 | 1.267456  |
| O | 6.236042  | 2.251328  | 1.264507  |
| H | -6.103572 | 0.008467  | 2.161804  |
| H | 7.118761  | -0.002482 | 1.253324  |
| N | 5.573621  | 4.033352  | -0.566892 |
| H | 5.048519  | 3.400277  | -1.240773 |
| H | 4.992947  | 4.812522  | -0.269488 |
| H | 5.846714  | 3.413786  | 0.260448  |
| H | 6.410873  | 4.386873  | -1.024184 |

---

| $E_{\text{elec}}$ (a.u.) | $ZPE$ (a.u.) | $G_{\text{corr}}$ (a.u.) |          |
|--------------------------|--------------|--------------------------|----------|
| -2773.758754             |              | 0.683482                 | 0.616038 |

---

Cartesian coordinates of pimer 2

|   |           |           |           |
|---|-----------|-----------|-----------|
| O | -1.800731 | 0.202157  | -6.133552 |
| N | -1.720441 | -1.892075 | -5.274689 |
| H | -1.784893 | -2.25519  | -6.215779 |
| C | 1.715791  | 0.481889  | -1.336562 |
| C | -1.749695 | -0.045089 | -3.760062 |
| C | 1.716388  | 0.968772  | -2.681983 |
| C | 1.700929  | 1.414189  | -0.257344 |
| C | -1.759203 | -0.532839 | -5.113216 |
| C | -1.764201 | 1.331756  | -3.505169 |
| H | -1.785799 | 2.017525  | -4.342449 |
| C | 1.659329  | 2.79538   | -0.549188 |
| C | -1.667972 | -2.872675 | -4.277138 |
| C | 1.722306  | -0.925282 | -1.102335 |

|   |           |           |           |
|---|-----------|-----------|-----------|
| C | -1.716388 | -0.968772 | -2.681983 |
| C | 1.680082  | 2.359699  | -2.917762 |
| C | 1.749695  | 0.045089  | -3.760062 |
| C | 1.722306  | 0.925282  | 1.102335  |
| C | -1.745641 | 1.802431  | -2.210722 |
| C | 1.647109  | 3.257488  | -1.847194 |
| H | 1.62686   | 3.518731  | 0.250851  |
| O | -1.624096 | -4.051235 | -4.607606 |
| C | -1.680082 | -2.359699 | -2.917762 |
| C | 1.745641  | -1.802431 | -2.210722 |
| C | 1.700929  | -1.414189 | 0.257344  |
| C | -1.715791 | -0.481889 | -1.336562 |
| C | 1.667972  | 2.872675  | -4.277138 |
| C | 1.759203  | 0.532839  | -5.113216 |
| C | 1.764201  | -1.331756 | -3.505169 |
| C | 1.745641  | 1.802431  | 2.210722  |
| C | 1.715791  | -0.481889 | 1.336562  |
| H | -1.746847 | 2.870752  | -2.060211 |
| C | -1.722306 | 0.925282  | -1.102335 |
| H | 1.614262  | 4.317358  | -2.064741 |
| C | -1.647109 | -3.257488 | -1.847194 |
| H | 1.746847  | -2.870752 | -2.060211 |
| C | 1.659329  | -2.79538  | 0.549188  |
| C | -1.700929 | -1.414189 | -0.257344 |
| O | 1.624096  | 4.051235  | -4.607606 |
| N | 1.720441  | 1.892075  | -5.274689 |
| O | 1.800731  | -0.202157 | -6.133552 |
| H | 1.785799  | -2.017525 | -4.342449 |
| H | 1.746847  | 2.870752  | 2.060211  |
| C | 1.764201  | 1.331756  | 3.505169  |
| C | 1.716388  | -0.968772 | 2.681983  |
| C | -1.700929 | 1.414189  | 0.257344  |
| H | -1.614262 | -4.317358 | -2.064741 |
| C | -1.659329 | -2.79538  | -0.549188 |
| H | 1.62686   | -3.518731 | -0.250851 |
| C | 1.647109  | -3.257488 | 1.847194  |
| C | -1.722306 | -0.925282 | 1.102335  |
| C | 1.749695  | -0.045089 | 3.760062  |
| H | 1.785799  | 2.017525  | 4.342449  |
| C | 1.680082  | -2.359699 | 2.917762  |
| C | -1.659329 | 2.79538   | 0.549188  |
| C | -1.715791 | 0.481889  | 1.336562  |
| H | -1.62686  | -3.518731 | 0.250851  |
| H | 1.614262  | -4.317358 | 2.064741  |



|   |           |           |           |
|---|-----------|-----------|-----------|
| C | -1.745641 | -1.802431 | 2.210722  |
| C | 1.759203  | -0.532839 | 5.113216  |
| C | 1.667972  | -2.872675 | 4.277138  |
| H | -1.62686  | 3.518731  | -0.250851 |
| C | -1.647109 | 3.257488  | 1.847194  |
| C | -1.716388 | 0.968772  | 2.681983  |
| H | -1.746847 | -2.870752 | 2.060211  |
| C | -1.764201 | -1.331756 | 3.505169  |
| N | 1.720441  | -1.892075 | 5.274689  |
| O | 1.800731  | 0.202157  | 6.133552  |
| O | 1.624096  | -4.051235 | 4.607606  |
| C | -1.680082 | 2.359699  | 2.917762  |
| H | -1.614262 | 4.317358  | 2.064741  |
| C | -1.749695 | 0.045089  | 3.760062  |
| H | -1.785799 | -2.017525 | 4.342449  |
| C | -1.667972 | 2.872675  | 4.277138  |
| C | -1.759203 | 0.532839  | 5.113216  |
| N | -1.720441 | 1.892075  | 5.274689  |
| O | -1.624096 | 4.051235  | 4.607606  |
| O | -1.800731 | -0.202157 | 6.133552  |
| H | 1.784893  | 2.25519   | -6.215779 |
| H | 1.784893  | -2.25519  | 6.215779  |
| H | -1.784893 | 2.25519   | 6.215779  |
| N | 0         | 0         | 8.02933   |
| H | -0.007229 | 0.830237  | 8.61629   |
| H | -0.844282 | -0.022729 | 7.37082   |
| H | 0.844282  | 0.022729  | 7.37082   |
| H | 0.007229  | -0.830237 | 8.61629   |
| N | 0         | 0         | -8.02933  |
| H | -0.007229 | -0.830237 | -8.61629  |
| H | -0.844282 | 0.022729  | -7.37082  |
| H | 0.844282  | -0.022729 | -7.37082  |
| H | 0.007229  | 0.830237  | -8.61629  |

Cartesian coordinates of pimer 3

|   |          |           |           |
|---|----------|-----------|-----------|
| O | 6.784099 | 2.449589  | -0.066423 |
| N | 6.383906 | 0.562535  | 1.116221  |
| H | 7.375308 | 0.367452  | 1.058731  |
| C | 0.559236 | -1.710105 | -1.067724 |
| C | 4.53545  | 1.97976   | 0.569959  |
| C | 1.970778 | -1.940381 | -1.038729 |
| C | 0.060372 | -0.477337 | -1.58229  |
| C | 5.9516   | 1.711676  | 0.517594  |

|   |           |           |           |
|---|-----------|-----------|-----------|
| C | 4.023905  | 3.196314  | 0.094239  |
| H | 4.717418  | 3.961133  | -0.236666 |
| C | 0.980687  | 0.486769  | -2.048867 |
| C | 5.591628  | -0.472442 | 1.618003  |
| C | -0.320237 | -2.713105 | -0.561898 |
| C | 3.654837  | 1.006195  | 1.106892  |
| C | 2.857058  | -0.939195 | -1.515736 |
| C | 2.468663  | -3.152909 | -0.5196   |
| C | -1.366864 | -0.244095 | -1.610319 |
| C | 2.66875   | 3.440189  | 0.101936  |
| C | 2.3398    | 0.258479  | -2.013319 |
| H | 0.631705  | 1.43453   | -2.428985 |
| O | 6.124134  | -1.506171 | 1.996451  |
| C | 4.155372  | -0.209525 | 1.618061  |
| C | 0.231006  | -3.911242 | -0.058152 |
| C | -1.746474 | -2.476544 | -0.58006  |
| C | 2.244975  | 1.249196  | 1.105998  |
| C | 4.285708  | -1.156768 | -1.449432 |
| C | 3.908766  | -3.398789 | -0.465138 |
| C | 1.593956  | -4.127923 | -0.040859 |
| C | -1.91822  | 0.95406   | -2.11152  |
| C | -2.244877 | -1.249193 | -1.105873 |
| H | 2.319359  | 4.399     | -0.249275 |
| C | 1.746629  | 2.476752  | 0.580625  |
| H | 3.020602  | 1.026838  | -2.355087 |
| C | 3.280215  | -1.177458 | 2.1174    |
| H | -0.412085 | -4.689551 | 0.32348   |
| C | -2.66849  | -3.439768 | -0.100768 |
| C | 1.366921  | 0.244003  | 1.610183  |
| O | 5.154187  | -0.333925 | -1.823314 |
| N | 4.704234  | -2.357777 | -0.949646 |
| O | 4.434068  | -4.417584 | -0.045797 |
| H | 2.011935  | -5.048057 | 0.346473  |
| H | -1.275152 | 1.735277  | -2.487419 |
| C | -3.28024  | 1.177161  | -2.117874 |
| C | -3.654756 | -1.006292 | -1.106867 |
| C | 0.320405  | 2.713315  | 0.562342  |
| H | 3.694777  | -2.103082 | 2.497147  |
| C | 1.918191  | -0.954237 | 2.111216  |
| H | -2.31899  | -4.398296 | 0.251108  |
| C | -4.023656 | -3.196012 | -0.093152 |
| C | -0.060338 | 0.477268  | 1.582081  |
| C | -4.155392 | 0.209222  | -1.618457 |
| H | -3.694816 | 2.102699  | -2.497813 |

|   |           |           |           |
|---|-----------|-----------|-----------|
| C | -4.535285 | -1.979755 | -0.569599 |
| C | -0.230792 | 3.911509  | 0.058684  |
| C | -0.559125 | 1.710198  | 1.067853  |
| H | 1.275081  | -1.735382 | 2.487187  |
| H | -4.717134 | -3.960642 | 0.238234  |
| C | -0.980704 | -0.48705  | 2.048076  |
| C | -5.591595 | 0.472032  | -1.618409 |
| C | -5.951381 | -1.711703 | -0.517273 |
| H | 0.412358  | 4.689807  | -0.322874 |
| C | -1.593741 | 4.128201  | 0.041288  |
| C | -1.970658 | 1.940504  | 1.038753  |
| H | -0.63182  | -1.435102 | 2.427562  |
| C | -2.339826 | -0.25871  | 2.012487  |
| N | -6.383789 | -0.562795 | -1.116079 |
| O | -6.124292 | 1.505628  | -1.997038 |
| O | -6.783923 | -2.449612 | 0.066959  |
| C | -2.468491 | 3.153113  | 0.519798  |
| H | -2.011713 | 5.048356  | -0.346002 |
| C | -2.856983 | 0.939195  | 1.515412  |
| H | -3.020702 | -1.027302 | 2.353607  |
| C | -3.908626 | 3.398916  | 0.465045  |
| C | -4.285652 | 1.156736  | 1.448936  |
| N | -4.70414  | 2.357765  | 0.949035  |
| O | -4.433815 | 4.417825  | 0.045813  |
| O | -5.154055 | 0.333808  | 1.822611  |
| H | 5.703361  | -2.496849 | -0.860101 |
| H | -7.375188 | -0.367686 | -1.058617 |
| H | -5.703264 | 2.496682  | 0.859191  |
| N | -5.795618 | -2.139534 | 2.526895  |
| H | -5.056484 | -2.795588 | 2.767133  |
| H | -5.393564 | -1.177906 | 2.3344    |
| H | -6.269324 | -2.438396 | 1.624651  |
| H | -6.474008 | -2.085129 | 3.28316   |
| N | 5.793729  | 2.139918  | -2.526523 |
| H | 5.392563  | 1.177886  | -2.333416 |
| H | 6.470893  | 2.085966  | -3.283933 |
| H | 5.053771  | 2.795506  | -2.765572 |
| H | 6.268613  | 2.439265  | -1.625413 |

---

| $E_{\text{elec}}$ (a.u.) | $ZPE$ (a.u.) | $G_{\text{corr}}$ (a.u.) |          |
|--------------------------|--------------|--------------------------|----------|
|                          | -2773.783415 | 0.685292                 | 0.616838 |

---

Cartesian coordinates of pimer 3-1

|   |           |           |           |
|---|-----------|-----------|-----------|
| O | 6.622427  | -2.788631 | 0.174875  |
| N | 6.394841  | -0.838162 | -0.95089  |
| H | 7.392569  | -0.707877 | -0.842563 |
| C | 0.653125  | 1.805398  | 0.991388  |
| C | 4.441126  | -2.158254 | -0.547931 |
| C | 2.077511  | 1.897534  | 1.072933  |
| C | -0.0027   | 0.620461  | 1.447236  |
| C | 5.865254  | -1.980255 | -0.418808 |
| C | 3.834976  | -3.359002 | -0.146624 |
| H | 4.46614   | -4.18267  | 0.167877  |
| C | 0.786925  | -0.445158 | 1.936592  |
| C | 5.692537  | 0.256559  | -1.459624 |
| C | -0.083261 | 2.892813  | 0.442055  |
| C | 3.645993  | -1.112698 | -1.085212 |
| C | 2.827499  | 0.800335  | 1.5758    |
| C | 2.724239  | 3.071928  | 0.63777   |
| C | -1.442069 | 0.54332   | 1.394804  |
| C | 2.468685  | -3.511414 | -0.206272 |
| C | 2.161281  | -0.355198 | 1.993304  |
| H | 0.322384  | -1.367114 | 2.251887  |
| O | 6.30362   | 1.263828  | -1.784026 |
| C | 4.242641  | 0.084074  | -1.53302  |
| C | 0.609749  | 4.048909  | 0.032777  |
| C | -1.527191 | 2.785135  | 0.322378  |
| C | 2.225507  | -1.263905 | -1.151168 |
| C | 4.269178  | 0.880317  | 1.616615  |
| C | 4.181481  | 3.183228  | 0.705537  |
| C | 1.984914  | 4.1395    | 0.133324  |
| C | -2.149597 | -0.574044 | 1.894216  |
| C | -2.181583 | 1.62227   | 0.819708  |
| H | 2.045758  | -4.46185  | 0.081775  |
| C | 1.626879  | -2.467869 | -0.670441 |
| H | 2.739787  | -1.198701 | 2.347454  |
| C | 3.453021  | 1.119048  | -2.037209 |
| H | 0.070438  | 4.897254  | -0.35973  |
| C | -2.298564 | 3.800444  | -0.275843 |
| C | 1.436404  | -0.197428 | -1.669968 |
| O | 5.030365  | -0.033721 | 2.014565  |
| N | 4.835793  | 2.052276  | 1.197863  |
| O | 4.829653  | 4.163556  | 0.377899  |
| H | 2.513772  | 5.03018   | -0.180248 |
| H | -1.617306 | -1.397221 | 2.346348  |
| C | -3.522166 | -0.655393 | 1.80826   |

|   |           |           |           |
|---|-----------|-----------|-----------|
| C | -3.604766 | 1.52365   | 0.716646  |
| C | 0.193364  | -2.595508 | -0.678062 |
| H | 3.939588  | 2.0299    | -2.363229 |
| C | 2.080233  | 0.979311  | -2.103148 |
| H | -1.82406  | 4.684126  | -0.673907 |
| C | -3.670795 | 3.691273  | -0.385121 |
| C | -0.005574 | -0.345598 | -1.722015 |
| C | -4.269412 | 0.367613  | 1.211883  |
| H | -4.032909 | -1.523462 | 2.205876  |
| C | -4.330383 | 2.566332  | 0.107145  |
| C | -0.45694  | -3.742799 | -0.158073 |
| C | -0.600122 | -1.538835 | -1.218603 |
| H | 1.502576  | 1.810497  | -2.477982 |
| H | -4.260529 | 4.469695  | -0.85148  |
| C | -0.838573 | 0.663275  | -2.248814 |
| C | -5.705527 | 0.271592  | 1.098564  |
| C | -5.783679 | 2.48404   | -0.010468 |
| H | 0.121994  | -4.551542 | 0.261218  |
| C | -1.827247 | -3.86005  | -0.164481 |
| C | -2.023776 | -1.670901 | -1.236022 |
| H | -0.411774 | 1.573754  | -2.640788 |
| C | -2.212159 | 0.526561  | -2.267984 |
| N | -6.351692 | 1.328833  | 0.533916  |
| O | -6.400864 | -0.703398 | 1.484024  |
| O | -6.507868 | 3.331181  | -0.507457 |
| C | -2.624555 | -2.837394 | -0.695662 |
| H | -2.312891 | -4.740322 | 0.235955  |
| C | -2.813953 | -0.626417 | -1.761013 |
| H | -2.846913 | 1.31378   | -2.655049 |
| C | -4.057201 | -2.950582 | -0.659843 |
| C | -4.266265 | -0.728677 | -1.746719 |
| N | -4.768781 | -1.923462 | -1.213062 |
| O | -4.673688 | -3.923535 | -0.147451 |
| O | -5.053105 | 0.117321  | -2.150624 |
| H | 5.847212  | 2.09895   | 1.193903  |
| H | -7.354884 | 1.247838  | 0.431975  |
| H | -5.777968 | -1.995139 | -1.212379 |
| N | -6.348344 | -3.315323 | 1.789459  |
| H | -5.725648 | -3.653239 | 0.985861  |
| H | -6.004687 | -3.67881  | 2.674542  |
| H | -6.311616 | -2.251951 | 1.775402  |
| H | -7.308564 | -3.620855 | 1.649841  |
| N | 5.469471  | -2.57467  | 2.576563  |
| H | 5.135945  | -1.579217 | 2.422419  |

|   |          |           |          |
|---|----------|-----------|----------|
| H | 6.085806 | -2.610945 | 3.385066 |
| H | 4.678207 | -3.19948  | 2.709315 |
| H | 5.997434 | -2.840077 | 1.694544 |

---

| $E_{\text{elec}}$ (a.u.) | $ZPE$ (a.u.) | $G_{\text{corr}}$ (a.u.) |          |
|--------------------------|--------------|--------------------------|----------|
|                          | -2773.786836 | 0.68464                  | 0.616086 |

---

Cartesian coordinates of pimer 4

|   |           |           |           |
|---|-----------|-----------|-----------|
| C | -0.688345 | 1.655879  | -1.110353 |
| C | -2.113705 | 1.646033  | -1.230477 |
| C | 0.058498  | 0.531172  | -1.573652 |
| C | -0.636179 | -0.564973 | -2.131617 |
| C | -0.04609  | 2.778036  | -0.51217  |
| C | -2.759891 | 0.522283  | -1.789131 |
| C | -2.861426 | 2.754614  | -0.758096 |
| C | 1.499028  | 0.542383  | -1.44975  |
| C | -2.011817 | -0.571303 | -2.233165 |
| H | -0.097587 | -1.436193 | -2.472238 |
| C | -0.836744 | 3.866671  | -0.073328 |
| C | 1.392848  | 2.778633  | -0.367244 |
| C | -4.211518 | 0.477722  | -1.869935 |
| C | -4.297688 | 2.729971  | -0.831211 |
| C | -2.207807 | 3.856454  | -0.19297  |
| C | 2.293934  | -0.533253 | -1.905606 |
| C | 2.141887  | 1.662095  | -0.843705 |
| H | -2.538915 | -1.426539 | -2.63732  |
| H | -0.36936  | 4.736524  | 0.361542  |
| C | 2.078233  | 3.850727  | 0.242397  |
| O | -4.883418 | -0.452046 | -2.298896 |
| N | -4.864882 | 1.627118  | -1.402398 |
| O | -5.040135 | 3.650528  | -0.394971 |
| H | -2.801784 | 4.696479  | 0.142481  |
| H | 1.833383  | -1.392667 | -2.368437 |
| C | 3.663961  | -0.529095 | -1.758061 |
| C | 3.564056  | 1.657309  | -0.68504  |
| H | 1.535047  | 4.707341  | 0.61036   |
| C | 3.448935  | 3.834456  | 0.396034  |
| C | 4.319151  | 0.543825  | -1.143528 |
| H | 4.243949  | -1.368156 | -2.121149 |
| C | 4.198117  | 2.749403  | -0.058927 |
| H | 3.970678  | 4.655075  | 0.870935  |
| C | 5.754273  | 0.539807  | -0.972573 |

|   |           |           |           |
|---|-----------|-----------|-----------|
| C | 5.64633   | 2.762434  | 0.114605  |
| N | 6.308062  | 1.639301  | -0.391613 |
| O | 6.523569  | -0.390758 | -1.322792 |
| O | 6.296933  | 3.659649  | 0.626674  |
| H | -5.874202 | 1.600286  | -1.468179 |
| H | 7.310302  | 1.626498  | -0.254787 |
| N | -6.651567 | 3.018054  | 1.583634  |
| H | -7.628874 | 3.260658  | 1.439569  |
| H | -6.05529  | 3.361153  | 0.763013  |
| H | -6.324554 | 3.432903  | 2.452301  |
| H | -6.549279 | 1.961635  | 1.603197  |
| C | 0.688679  | -1.65794  | 1.110517  |
| C | 2.114152  | -1.649025 | 1.22934   |
| C | -0.056934 | -0.53249  | 1.573996  |
| C | 0.638918  | 0.56296   | 2.131787  |
| C | 0.045091  | -2.779969 | 0.513462  |
| C | 2.761603  | -0.525683 | 1.78743   |
| C | 2.860673  | -2.758141 | 0.756352  |
| C | -1.49754  | -0.54219  | 1.450271  |
| C | 2.01465   | 0.56827   | 2.232365  |
| H | 0.101217  | 1.43442   | 2.473193  |
| C | 0.834613  | -3.869107 | 0.073936  |
| C | -1.394032 | -2.779786 | 0.370152  |
| C | 4.213332  | -0.48212  | 1.867077  |
| C | 4.297053  | -2.734553 | 0.828133  |
| C | 2.205832  | -3.85963  | 0.192009  |
| C | -2.291052 | 0.535112  | 1.904432  |
| C | -2.141715 | -1.661953 | 0.845667  |
| H | 2.542637  | 1.423022  | 2.636391  |
| H | 0.36628   | -4.738689 | -0.360453 |
| C | -2.080883 | -3.852203 | -0.23724  |
| O | 4.886212  | 0.447003  | 2.295923  |
| N | 4.865508  | -1.631838 | 1.398697  |
| O | 5.038573  | -3.655296 | 0.391055  |
| H | 2.799004  | -4.699969 | -0.144083 |
| H | -1.829412 | 1.394863  | 2.365549  |
| C | -3.661114 | 0.532563  | 1.756636  |
| C | -3.563884 | -1.655799 | 0.687322  |
| H | -1.538816 | -4.710067 | -0.603938 |
| C | -3.451677 | -3.834757 | -0.39026  |
| C | -4.317448 | -0.540616 | 1.143977  |
| H | -4.240344 | 1.373117  | 2.117531  |
| C | -4.199464 | -2.748089 | 0.063037  |
| H | -3.974461 | -4.655639 | -0.863559 |

|   |           |           |           |
|---|-----------|-----------|-----------|
| C | -5.752614 | -0.534468 | 0.972492  |
| C | -5.647717 | -2.759385 | -0.1105   |
| N | -6.307949 | -1.634222 | 0.393339  |
| O | -6.519755 | 0.398374  | 1.320482  |
| O | -6.299584 | -3.656675 | -0.620801 |
| H | 5.874837  | -1.606188 | 1.464879  |
| H | -7.310126 | -1.620305 | 0.256209  |
| N | 6.645453  | -3.008604 | -1.588471 |
| H | 6.317235  | -3.417361 | -2.459565 |
| H | 6.54139   | -1.951254 | -1.600059 |
| H | 6.052414  | -3.359491 | -0.769462 |
| H | 7.623707  | -3.250062 | -1.448927 |

---

| $E_{\text{elec}}$ (a.u.) | $ZPE$ (a.u.) | $G_{\text{corr}}$ (a.u.) |          |
|--------------------------|--------------|--------------------------|----------|
|                          | -2773.786246 | 0.68394                  | 0.614954 |

---

Cartesian coordinates of pimer 5

|   |           |           |           |
|---|-----------|-----------|-----------|
| O | -7.499518 | 1.525898  | -0.776014 |
| N | -7.286294 | -0.700956 | -0.452064 |
| H | -8.279297 | -0.72109  | -0.257374 |
| C | 0.350941  | 0.492614  | 1.557824  |
| C | -5.351743 | 0.531774  | -1.10704  |
| C | -1.0639   | 0.436241  | 1.755747  |
| C | 0.949772  | 1.71659   | 1.144898  |
| C | -6.748121 | 0.506606  | -0.790541 |
| C | -4.742176 | 1.700695  | -1.597121 |
| H | -5.362266 | 2.557959  | -1.830558 |
| C | 0.126589  | 2.847036  | 0.953165  |
| C | -6.61374  | -1.922453 | -0.307629 |
| C | 1.132011  | -0.681695 | 1.776708  |
| C | -4.573012 | -0.644011 | -0.924681 |
| C | -1.845652 | 1.599777  | 1.548422  |
| C | -1.664779 | -0.776785 | 2.156964  |
| C | 2.379622  | 1.769531  | 0.927377  |
| C | -3.391273 | 1.746698  | -1.832749 |
| C | -1.237837 | 2.792968  | 1.156714  |
| H | 0.55886   | 3.786501  | 0.644974  |
| O | -7.250064 | -2.921467 | -0.006799 |
| C | -5.174135 | -1.852015 | -0.521563 |
| C | 0.479224  | -1.868864 | 2.177074  |
| C | 2.558362  | -0.625432 | 1.579025  |
| C | -3.159007 | -0.594714 | -1.14686  |



|   |           |           |           |
|---|-----------|-----------|-----------|
| C | -3.280359 | 1.552845  | 1.756986  |
| C | -3.107526 | -0.849439 | 2.362627  |
| C | -0.886603 | -1.914499 | 2.369705  |
| C | 3.029165  | 2.952347  | 0.509956  |
| C | 3.158959  | 0.59501   | 1.146764  |
| H | -2.969194 | 2.657591  | -2.22799  |
| C | -2.55809  | 0.625544  | -1.579179 |
| H | -1.856645 | 3.668592  | 1.011273  |
| C | -4.392577 | -2.993085 | -0.314448 |
| H | 1.045535  | -2.773712 | 2.335703  |
| C | 3.391835  | -1.746355 | 1.83254   |
| C | -2.379966 | -1.769414 | -0.927367 |
| O | -4.03131  | 2.540377  | 1.620089  |
| N | -3.799996 | 0.347281  | 2.140742  |
| O | -3.727143 | -1.842112 | 2.712457  |
| H | -1.381707 | -2.827182 | 2.675822  |
| H | 2.460642  | 3.850262  | 0.324014  |
| C | 4.391911  | 2.993742  | 0.314498  |
| C | 4.572936  | 0.644677  | 0.924545  |
| C | -1.131729 | 0.681438  | -1.776841 |
| H | -4.884306 | -3.899025 | 0.013952  |
| C | -3.029835 | -2.952056 | -0.509886 |
| H | 2.970007  | -2.657368 | 2.227778  |
| C | 4.742725  | -1.699998 | 1.596832  |
| C | -0.950103 | -1.716835 | -1.144819 |
| C | 5.173749  | 1.852873  | 0.521513  |
| H | 4.883397  | 3.899842  | -0.013823 |
| C | 5.351966  | -0.53092  | 1.106771  |
| C | -0.478634 | 1.868426  | -2.177313 |
| C | -0.350952 | -0.493032 | -1.557809 |
| H | -2.461539 | -3.850093 | -0.323851 |
| H | 5.363037  | -2.557126 | 1.830181  |
| C | -0.127181 | -2.847463 | -0.952938 |
| C | 6.613335  | 1.923681  | 0.307511  |
| C | 6.748364  | -0.505414 | 0.790175  |
| H | -1.044728 | 2.773375  | -2.336114 |
| C | 0.887205  | 1.913727  | -2.369838 |
| C | 1.063924  | -0.436995 | -1.755611 |
| H | -0.55969  | -3.7868   | -0.644697 |
| C | 1.237271  | -2.79372  | -1.156342 |
| N | 7.286195  | 0.702345  | 0.45175   |
| O | 7.24937   | 2.922887  | 0.006718  |
| O | 7.499954  | -1.524474 | 0.775477  |
| C | 1.66511   | 0.775852  | -2.156876 |

|   |           |           |           |
|---|-----------|-----------|-----------|
| H | 1.382556  | 2.826258  | -2.676007 |
| C | 1.8454    | -1.600687 | -1.548082 |
| H | 1.855871  | -3.669461 | -1.010733 |
| C | 3.107896  | 0.848187  | -2.362307 |
| C | 3.280134  | -1.55405  | -1.756343 |
| N | 3.800087  | -0.34867  | -2.140195 |
| O | 3.727766  | 1.84062   | -2.712366 |
| O | 4.030846  | -2.541752 | -1.619047 |
| H | -4.799754 | 0.29317   | 2.28448   |
| H | 8.27918   | 0.722754  | 0.257002  |
| H | 4.79988   | -0.294727 | -2.283736 |
| N | 6.406796  | -3.406698 | -0.647999 |
| H | 6.176532  | -4.2475   | -0.124111 |
| H | 5.521665  | -3.0055   | -1.044716 |
| H | 6.880121  | -2.670411 | 0.004351  |
| H | 7.04006   | -3.651735 | -1.405631 |
| N | -6.406402 | 3.407336  | 0.647371  |
| H | -7.039791 | 3.652533  | 1.404844  |
| H | -6.879843 | 2.671003  | -0.005315 |
| H | -6.175677 | 4.248098  | 0.123632  |
| H | -5.521676 | 3.005815  | 1.044349  |

---

| $E_{elec}$ (a.u.) | ZPE (a.u.)   | $G_{corr}$ (a.u.) |          |
|-------------------|--------------|-------------------|----------|
|                   | -2773.775663 | 0.683885          | 0.614638 |

---

Cartesian coordinates of pimer 5-1

|   |           |           |           |
|---|-----------|-----------|-----------|
| O | 7.383139  | -2.518799 | 0.760856  |
| N | 7.289982  | -0.261013 | 0.608986  |
| H | 8.28452   | -0.27419  | 0.421785  |
| C | -0.340174 | -0.167726 | -1.638437 |
| C | 5.244437  | -1.472722 | 0.985394  |
| C | 1.078273  | -0.143442 | -1.813049 |
| C | -1.009337 | -1.420651 | -1.552148 |
| C | 6.689252  | -1.513974 | 0.791839  |
| C | 4.530909  | -2.670558 | 1.08336   |
| H | 5.075932  | -3.601446 | 1.001107  |
| C | -0.252984 | -2.605856 | -1.651149 |
| C | 6.680609  | 0.960438  | 0.624978  |
| C | -1.054838 | 1.065884  | -1.550935 |
| C | 4.572422  | -0.238072 | 1.062828  |
| C | 1.789659  | -1.359038 | -1.89747  |
| C | 1.753338  | 1.101125  | -1.900482 |

|   |           |           |           |
|---|-----------|-----------|-----------|
| C | -2.446471 | -1.446106 | -1.359569 |
| C | 3.164598  | -2.65725  | 1.263083  |
| C | 1.117824  | -2.577293 | -1.824491 |
| H | -0.739776 | -3.567288 | -1.59467  |
| O | 7.37413   | 1.982252  | 0.341269  |
| C | 5.283063  | 0.987541  | 0.931083  |
| C | -0.331774 | 2.278275  | -1.638092 |
| C | -2.481671 | 1.042174  | -1.370648 |
| C | 3.155671  | -0.213863 | 1.267356  |
| C | 3.240252  | -1.351192 | -2.071289 |
| C | 3.189458  | 1.132077  | -2.085646 |
| C | 1.035357  | 2.296341  | -1.81745  |
| C | -3.164677 | -2.657139 | -1.262862 |
| C | -3.155803 | -0.213772 | -1.267309 |
| H | 2.648762  | -3.603185 | 1.319546  |
| C | 2.446352  | -1.446206 | 1.359639  |
| H | 1.694228  | -3.490404 | -1.89962  |
| C | 4.602914  | 2.207132  | 1.102569  |
| H | -0.846804 | 3.223543  | -1.561065 |
| C | -3.249478 | 2.236071  | -1.322885 |
| C | 2.481507  | 1.04206   | 1.370647  |
| O | 3.950941  | -2.340047 | -2.156706 |
| N | 3.820676  | -0.080653 | -2.154497 |
| O | 3.851236  | 2.185757  | -2.196516 |
| H | 1.574924  | 3.231758  | -1.88662  |
| H | -2.648793 | -3.603061 | -1.319103 |
| C | -4.531026 | -2.670466 | -1.083216 |
| C | -4.572553 | -0.237985 | -1.062806 |
| C | 1.009207  | -1.420798 | 1.552052  |
| H | 5.171423  | 3.129476  | 1.102558  |
| C | 3.249271  | 2.236019  | 1.32259   |
| H | -2.773047 | 3.19324   | -1.468147 |
| C | -4.603166 | 2.207135  | -1.102984 |
| C | 1.05472   | 1.065725  | 1.551085  |
| C | -5.244576 | -1.472671 | -0.985379 |
| H | -5.076014 | -3.601371 | -1.000962 |
| C | -5.283219 | 0.987573  | -0.931228 |
| C | 0.252839  | -2.606037 | 1.650826  |
| C | 0.34003   | -0.167895 | 1.638425  |
| H | 2.772765  | 3.193201  | 1.467508  |
| H | -5.171758 | 3.12943   | -1.10344  |
| C | 0.331678  | 2.278117  | 1.638565  |
| C | -6.689362 | -1.513942 | -0.791892 |
| C | -6.680875 | 0.960489  | -0.625041 |

|   |           |           |           |
|---|-----------|-----------|-----------|
| H | 0.739621  | -3.567459 | 1.594172  |
| C | -1.117959 | -2.577486 | 1.824099  |
| C | -1.078426 | -0.143611 | 1.813018  |
| H | 0.846733  | 3.223403  | 1.561918  |
| C | -1.035437 | 2.296164  | 1.818001  |
| N | -7.290246 | -0.260961 | -0.609383 |
| O | -7.383238 | -2.51878  | -0.760952 |
| O | -7.374141 | 1.982222  | -0.340972 |
| C | -1.789814 | -1.359233 | 1.897253  |
| H | -1.694379 | -3.4906   | 1.899065  |
| C | -1.75346  | 1.10094   | 1.900736  |
| H | -1.57496  | 3.231582  | 1.887528  |
| C | -3.240329 | -1.351415 | 2.071167  |
| C | -3.189532 | 1.13188   | 2.086266  |
| N | -3.820764 | -0.080807 | 2.154753  |
| O | -3.951124 | -2.34021  | 2.156413  |
| O | -3.85121  | 2.185575  | 2.198024  |
| H | 4.824842  | -0.079974 | -2.275149 |
| H | -8.284695 | -0.2742   | -0.421745 |
| H | -4.82488  | -0.080208 | 2.275805  |
| N | -6.190187 | 3.363544  | 1.514779  |
| H | -5.923991 | 4.302107  | 1.227426  |
| H | -5.321538 | 2.835441  | 1.781767  |
| H | -6.698135 | 2.846753  | 0.696704  |
| H | -6.811108 | 3.427677  | 2.318133  |
| N | 6.192536  | 3.362085  | -1.51603  |
| H | 6.814024  | 3.425344  | -2.318994 |
| H | 6.699708  | 2.845259  | -0.696977 |
| H | 5.323737  | 2.834498  | -1.783029 |
| H | 5.926625  | 4.300985  | -1.229508 |

---

| $E_{\text{elec}}$ (a.u.) | $ZPE$ (a.u.) | $G_{\text{corr}}$ (a.u.) |          |
|--------------------------|--------------|--------------------------|----------|
|                          | -2773.775367 | 0.683773                 | 0.615279 |

---

Cartesian coordinates of pimer **6**

|   |           |           |           |
|---|-----------|-----------|-----------|
| O | -1.719153 | -5.460582 | -1.247383 |
| N | -3.469667 | -4.083896 | -1.553295 |
| H | -4.058908 | -4.905731 | -1.521807 |
| C | 1.076871  | -1.695385 | 1.872141  |
| C | -1.282444 | -3.115962 | -1.490495 |
| C | 1.866695  | -2.887799 | 1.930037  |
| C | 1.729202  | -0.42875  | 1.839625  |

|   |           |           |           |
|---|-----------|-----------|-----------|
| C | -2.123298 | -4.288069 | -1.419272 |
| C | 0.10681   | -3.230329 | -1.382516 |
| H | 0.547753  | -4.211287 | -1.262516 |
| C | 3.140644  | -0.386427 | 1.870926  |
| C | -4.138184 | -2.869261 | -1.736357 |
| C | -0.345346 | -1.798881 | 1.832617  |
| C | -1.875622 | -1.836199 | -1.650618 |
| C | 3.273131  | -2.790857 | 1.965798  |
| C | 1.223435  | -4.155175 | 1.9377    |
| C | 0.933054  | 0.775599  | 1.753542  |
| C | 0.910222  | -2.11219  | -1.413798 |
| C | 3.894803  | -1.538366 | 1.937016  |
| H | 3.657829  | 0.559789  | 1.833549  |
| O | -5.356966 | -2.867769 | -1.836859 |
| C | -3.275051 | -1.695881 | -1.777388 |
| C | -0.939705 | -3.080547 | 1.918731  |
| C | -1.138441 | -0.601007 | 1.697087  |
| C | -1.045099 | -0.67089  | -1.679811 |
| C | 4.092964  | -3.993793 | 2.030826  |
| C | 2.020372  | -5.351402 | 1.927746  |
| C | -0.178087 | -4.22445  | 1.965444  |
| C | 1.523963  | 2.058587  | 1.736154  |
| C | -0.48538  | 0.667918  | 1.664043  |
| H | 1.975905  | -2.247862 | -1.30992  |
| C | 0.366954  | -0.815146 | -1.556343 |
| H | 4.976047  | -1.499694 | 1.96496   |
| C | -3.846922 | -0.431529 | -1.923065 |
| H | -2.014137 | -3.179902 | 1.94963   |
| C | -2.54334  | -0.648873 | 1.567266  |
| C | -1.650084 | 0.614704  | -1.820524 |
| O | 5.314194  | -4.028781 | 2.085018  |
| N | 3.374249  | -5.194199 | 2.008809  |
| O | 1.562477  | -6.523242 | 1.838818  |
| H | -0.659837 | -5.190637 | 2.048404  |
| H | 2.595115  | 2.16688   | 1.806375  |
| C | 0.761186  | 3.201095  | 1.618634  |
| C | -1.27096  | 1.854506  | 1.522871  |
| C | 1.205481  | 0.362287  | -1.574868 |
| H | -4.923263 | -0.357784 | -2.008959 |
| C | -3.053652 | 0.697316  | -1.939232 |
| H | -3.059697 | -1.596658 | 1.559791  |
| C | -3.291922 | 0.498418  | 1.409112  |
| C | -0.811611 | 1.791588  | -1.833198 |
| C | -0.630064 | 3.119774  | 1.506662  |

|   |           |           |           |
|---|-----------|-----------|-----------|
| H | 1.228448  | 4.177418  | 1.605716  |
| C | -2.672536 | 1.749517  | 1.388188  |
| C | 2.609902  | 0.276116  | -1.458561 |
| C | 0.601489  | 1.647503  | -1.713117 |
| H | -3.541152 | 1.656032  | -2.029781 |
| H | -4.366184 | 0.451336  | 1.286563  |
| C | -1.354613 | 3.091897  | -1.971852 |
| C | -1.419846 | 4.318347  | 1.363109  |
| C | -3.480995 | 2.942645  | 1.191114  |
| H | 3.090474  | -0.682359 | -1.338261 |
| C | 3.403763  | 1.401888  | -1.482882 |
| C | 1.433655  | 2.812675  | -1.733145 |
| H | -2.420421 | 3.226466  | -2.077521 |
| C | -0.551445 | 4.208785  | -1.989043 |
| N | -2.771075 | 4.147143  | 1.224689  |
| O | -0.951985 | 5.480294  | 1.365733  |
| O | -4.690938 | 2.970703  | 1.00401   |
| C | 2.83215   | 2.669979  | -1.624832 |
| H | 4.480396  | 1.328937  | -1.39731  |
| C | 0.840793  | 4.09792   | -1.862263 |
| H | -0.992313 | 5.18789   | -2.130057 |
| C | 3.696809  | 3.84061   | -1.653776 |
| C | 1.679385  | 5.265513  | -1.876167 |
| N | 3.02616   | 5.060336  | -1.791088 |
| O | 4.917118  | 3.836098  | -1.564048 |
| O | 1.269144  | 6.45564   | -1.962672 |
| H | 3.93088   | -6.039243 | 2.023002  |
| H | -3.336231 | 4.981579  | 1.142905  |
| H | 3.613828  | 5.883804  | -1.816603 |
| N | -0.470041 | 7.487653  | -0.326738 |
| H | 0.018418  | 8.213106  | 0.193316  |
| H | 0.205302  | 7.053452  | -1.05082  |
| H | -0.76629  | 6.727168  | 0.337539  |
| H | -1.278016 | 7.894593  | -0.790454 |
| N | -0.151964 | -7.238946 | -0.006865 |
| H | -0.84378  | -7.876069 | 0.382065  |
| H | -0.659273 | -6.443726 | -0.469185 |
| H | 0.503876  | -6.89769  | 0.776498  |
| H | 0.394595  | -7.738281 | -0.704983 |

---

| $E_{\text{elec}}$ (a.u.) | $ZPE$ (a.u.) | $G_{\text{corr}}$ (a.u.) |          |
|--------------------------|--------------|--------------------------|----------|
|                          | -2773.781073 | 0.683953                 | 0.613982 |

---

Cartesian coordinates of pimer 7

|   |           |          |           |
|---|-----------|----------|-----------|
| C | -0.177424 | 1.620445 | -0.68065  |
| C | -0.083857 | 1.68692  | -2.107295 |
| C | 1.0065    | 1.768221 | 0.098344  |
| C | 2.237716  | 1.992215 | -0.559416 |
| C | -1.448375 | 1.402442 | -0.073558 |
| C | 1.164346  | 1.898986 | -2.716112 |
| C | -1.264188 | 1.535484 | -2.891967 |
| C | 0.914333  | 1.704719 | 1.543317  |
| C | 2.319031  | 2.048131 | -1.931495 |
| H | 3.144799  | 2.118131 | 0.011769  |
| C | -2.597929 | 1.273262 | -0.899404 |
| C | -1.542223 | 1.341373 | 1.365447  |
| C | 1.279511  | 1.965334 | -4.161862 |
| C | -1.151501 | 1.591272 | -4.28776  |
| C | -2.514282 | 1.326552 | -2.264511 |
| C | 2.048378  | 1.838018 | 2.367552  |
| C | -0.356954 | 1.490924 | 2.149594  |
| H | 3.262538  | 2.216604 | -2.43415  |
| H | -3.568744 | 1.1189   | -0.454705 |
| C | -2.769291 | 1.128816 | 2.023705  |
| O | 2.296133  | 2.171758 | -4.808    |
| N | 0.062949  | 1.787552 | -4.851304 |
| O | -2.210162 | 1.495065 | -5.053629 |
| H | -3.397804 | 1.220324 | -2.879034 |
| H | 3.021357  | 2.007489 | 1.9333    |
| C | 1.954878  | 1.763706 | 3.747466  |
| C | -0.44906  | 1.414874 | 3.572036  |
| H | -3.67969  | 1.011108 | 1.457153  |
| C | -2.852644 | 1.073741 | 3.404892  |
| C | 0.72461   | 1.542866 | 4.355482  |
| H | 2.832655  | 1.862798 | 4.372759  |
| C | -1.70821  | 1.208063 | 4.180654  |
| H | -3.79868  | 0.910833 | 3.904559  |
| C | 0.643473  | 1.462596 | 5.814133  |
| C | -1.827908 | 1.17321  | 5.641525  |
| N | -0.618077 | 1.266386 | 6.336871  |
| O | 1.612232  | 1.540624 | 6.572676  |
| O | -2.871278 | 1.077568 | 6.262375  |
| H | 0.145791  | 1.848855 | -5.85788  |
| H | -0.701767 | 1.304095 | 7.344759  |
| N | -1.900702 | 1.150982 | -7.650991 |
| H | -1.144538 | 1.486151 | -8.238014 |
| H | -2.013224 | 1.433198 | -6.065573 |

|   |           |           |           |
|---|-----------|-----------|-----------|
| H | -2.769822 | 1.457187  | -8.076177 |
| H | -1.889723 | 0.129415  | -7.65395  |
| C | 0.177509  | -1.620052 | 0.680748  |
| C | 0.084391  | -1.68662  | 2.107416  |
| C | -1.006631 | -1.767959 | -0.0979   |
| C | -2.237584 | -1.992324 | 0.560211  |
| C | 1.44825   | -1.401876 | 0.07328   |
| C | -1.163568 | -1.899142 | 2.716592  |
| C | 1.26489   | -1.53486  | 2.891751  |
| C | -0.914904 | -1.704282 | -1.542901 |
| C | -2.318446 | -2.048497 | 1.932314  |
| H | -3.144802 | -2.118446 | -0.010712 |
| C | 2.597957  | -1.272089 | 0.898812  |
| C | 1.541756  | -1.341287 | -1.365771 |
| C | -1.278287 | -1.965636 | 4.162369  |
| C | 1.152628  | -1.590666 | 4.287593  |
| C | 2.514709  | -1.325355 | 2.263946  |
| C | -2.049223 | -1.837231 | -2.36681  |
| C | 0.356257  | -1.490795 | -2.149566 |
| H | -3.261745 | -2.217337 | 2.435236  |
| H | 3.568558  | -1.117176 | 0.453833  |
| C | 2.768735  | -1.12933  | -2.024395 |
| O | -2.294612 | -2.172581 | 4.808804  |
| N | -0.061589 | -1.787423 | 4.851475  |
| O | 2.211441  | -1.493923 | 5.053148  |
| H | 3.398351  | -1.218668 | 2.878217  |
| H | -3.022154 | -2.006236 | -1.93227  |
| C | -1.956077 | -1.763128 | -3.746762 |
| C | 0.448028  | -1.415123 | -3.572051 |
| H | 3.679335  | -1.011906 | -1.458105 |
| C | 2.85177   | -1.074728 | -3.405615 |
| C | -0.725888 | -1.54291  | -4.355154 |
| H | -2.834071 | -1.861957 | -4.371793 |
| C | 1.707081  | -1.208859 | -4.181044 |
| H | 3.79774   | -0.912345 | -3.905575 |
| C | -0.645136 | -1.463125 | -5.813854 |
| C | 1.826413  | -1.17455  | -5.641959 |
| N | 0.616395  | -1.267528 | -6.336983 |
| O | -1.614071 | -1.541102 | -6.572134 |
| O | 2.869669  | -1.079406 | -6.263097 |
| H | -0.144129 | -1.848776 | 5.858072  |
| H | 0.69986   | -1.305858 | -7.344868 |
| N | 1.90274   | -1.150853 | 7.65053   |
| H | 2.773075  | -1.455295 | 8.074508  |



|   |          |           |          |
|---|----------|-----------|----------|
| H | 1.889382 | -0.129324 | 7.654182 |
| H | 2.014802 | -1.432341 | 6.065241 |
| H | 1.148021 | -1.488286 | 8.238107 |

---

| $E_{\text{elec}}$ (a.u.) | $ZPE$ (a.u.) | $G_{\text{corr}}$ (a.u.) |          |
|--------------------------|--------------|--------------------------|----------|
|                          | -2773.760391 | 0.68359                  | 0.614864 |

---

Cartesian coordinates of pimer **8**

|   |           |           |           |
|---|-----------|-----------|-----------|
| O | -6.757641 | 2.560285  | 0.120271  |
| N | -6.391553 | 0.659459  | -1.05454  |
| H | -7.379866 | 0.456873  | -0.972204 |
| C | -0.56723  | -1.789347 | 1.031837  |
| C | -4.51933  | 2.081843  | -0.533586 |
| C | -1.980618 | -2.007418 | 0.986238  |
| C | -0.059354 | -0.559643 | 1.552528  |
| C | -5.958336 | 1.821036  | -0.455165 |
| C | -4.012298 | 3.287128  | -0.058294 |
| H | -4.705225 | 4.033629  | 0.310556  |
| C | -0.981267 | 0.412008  | 2.023489  |
| C | -5.599888 | -0.381048 | -1.529256 |
| C | 0.304942  | -2.798085 | 0.535505  |
| C | -3.648127 | 1.108776  | -1.073353 |
| C | -2.871315 | -0.991361 | 1.457315  |
| C | -2.476978 | -3.211328 | 0.459091  |
| C | 1.364072  | -0.335672 | 1.587078  |
| C | -2.649806 | 3.53125   | -0.076822 |
| C | -2.335212 | 0.209968  | 1.974056  |
| H | -0.623304 | 1.351391  | 2.416137  |
| O | -6.1184   | -1.439207 | -1.855203 |
| C | -4.158916 | -0.113181 | -1.570562 |
| C | -0.244586 | -3.992292 | 0.023703  |
| C | 1.739474  | -2.572761 | 0.56152   |
| C | -2.240658 | 1.346827  | -1.082787 |
| C | -4.255514 | -1.220371 | 1.342521  |
| C | -3.914455 | -3.446508 | 0.367823  |
| C | -1.605469 | -4.197946 | -0.012937 |
| C | 1.92618   | 0.857984  | 2.084988  |
| C | 2.2407    | -1.346913 | 1.082713  |
| H | -2.298564 | 4.483403  | 0.2897    |
| C | -1.73954  | 2.572558  | -0.561195 |
| H | -2.998539 | 0.990631  | 2.318886  |
| C | -3.293506 | -1.076994 | -2.079634 |

|   |           |           |           |
|---|-----------|-----------|-----------|
| H | 0.399069  | -4.773923 | -0.349478 |
| C | 2.649676  | -3.531868 | 0.077818  |
| C | -1.363936 | 0.335802  | -1.587412 |
| O | -5.223491 | -0.408106 | 1.684971  |
| N | -4.701781 | -2.393157 | 0.840257  |
| O | -4.447165 | -4.452005 | -0.071164 |
| H | -2.029188 | -5.112025 | -0.407539 |
| H | 1.291409  | 1.642513  | 2.468304  |
| C | 3.29377   | 1.077186  | 2.078654  |
| C | 3.648193  | -1.108994 | 1.073181  |
| C | -0.305035 | 2.79813   | -0.535399 |
| H | -3.711027 | -2.002936 | -2.455933 |
| C | -1.925917 | -0.857754 | -2.085682 |
| H | 2.298337  | -4.484212 | -0.288123 |
| C | 4.012205  | -3.287971 | 0.059403  |
| C | 0.05948   | 0.559849  | -1.552699 |
| C | 4.159083  | 0.113184  | 1.56977   |
| H | 3.71137   | 2.003251  | 2.454567  |
| C | 4.519316  | -2.082448 | 0.534015  |
| C | 0.244374  | 3.992456  | -0.023762 |
| C | 0.567239  | 1.789507  | -1.031809 |
| H | -1.291056 | -1.642163 | -2.4691   |
| H | 4.705139  | -4.034754 | -0.308871 |
| C | 0.981476  | -0.411627 | -2.023855 |
| C | 5.600031  | 0.38105   | 1.527954  |
| C | 5.958363  | -1.821856 | 0.455492  |
| H | -0.399357 | 4.774122  | 0.349211  |
| C | 1.605241  | 4.198239  | 0.012886  |
| C | 1.980609  | 2.007693  | -0.986166 |
| H | 0.623582  | -1.35089  | -2.416858 |
| C | 2.335407  | -0.209513 | -1.974319 |
| N | 6.391616  | -0.659742 | 1.053821  |
| O | 6.118578  | 1.439463  | 1.853092  |
| O | 6.757632  | -2.561664 | -0.11923  |
| C | 2.476848  | 3.21165   | -0.459009 |
| H | 2.028861  | 5.11241   | 0.407377  |
| C | 2.871411  | 0.991736  | -1.457271 |
| H | 2.998788  | -0.989962 | -2.319535 |
| C | 3.914303  | 3.446892  | -0.367567 |
| C | 4.25557   | 1.220827  | -1.342289 |
| N | 4.701738  | 2.393608  | -0.839961 |
| O | 4.446909  | 4.452401  | 0.071526  |
| O | 5.223681  | 0.408602  | -1.684647 |
| H | -5.701053 | -2.501853 | 0.708041  |

|   |           |           |           |
|---|-----------|-----------|-----------|
| H | 7.379957  | -0.457312 | 0.971444  |
| H | 5.700961  | 2.502172  | -0.707206 |
| N | 5.329392  | -1.971648 | -2.720811 |
| H | 4.571994  | -2.639856 | -2.811373 |
| H | 5.035641  | -0.524576 | -2.10785  |
| H | 6.004311  | -2.366926 | -2.063127 |
| H | 5.78178   | -1.889939 | -3.625526 |
| N | -5.329816 | 1.971285  | 2.722128  |
| H | -5.035529 | 0.524872  | 2.108965  |
| H | -5.787266 | 1.888412  | 3.624204  |
| H | -4.572317 | 2.638601  | 2.818146  |
| H | -6.000952 | 2.368169  | 2.061524  |

---

| $E_{\text{elec}}$ (a.u.) | $ZPE$ (a.u.) | $G_{\text{corr}}$ (a.u.) |          |
|--------------------------|--------------|--------------------------|----------|
|                          | -2773.751565 | 0.6825                   | 0.613378 |

---

Cartesian coordinates of pimer **9**

|   |           |           |           |
|---|-----------|-----------|-----------|
| C | -0.688592 | -1.76579  | 0.981953  |
| C | -2.117864 | -1.760182 | 1.047746  |
| C | 0.03614   | -0.67744  | 1.545921  |
| C | -0.678034 | 0.374998  | 2.162178  |
| C | -0.022682 | -2.845585 | 0.329209  |
| C | -2.783771 | -0.684243 | 1.661436  |
| C | -2.850328 | -2.829595 | 0.453825  |
| C | 1.484116  | -0.667813 | 1.453724  |
| C | -2.052985 | 0.376511  | 2.217331  |
| H | -0.150511 | 1.215365  | 2.587195  |
| C | -0.799651 | -3.893864 | -0.23522  |
| C | 1.416621  | -2.842613 | 0.243483  |
| C | -4.234837 | -0.632245 | 1.676371  |
| C | -4.252097 | -2.771723 | 0.467781  |
| C | -2.167309 | -3.891566 | -0.180822 |
| C | 2.256833  | 0.386623  | 1.975831  |
| C | 2.146314  | -1.747045 | 0.799478  |
| H | -2.59654  | 1.197734  | 2.667062  |
| H | -0.312882 | -4.72073  | -0.728492 |
| C | 2.129918  | -3.879711 | -0.390517 |
| O | -4.931709 | 0.262067  | 2.140124  |
| N | -4.867365 | -1.737142 | 1.082022  |
| O | -4.975939 | -3.705863 | -0.0952   |
| H | -2.741157 | -4.694004 | -0.623899 |
| H | 1.782248  | 1.216287  | 2.477363  |

|   |           |           |           |
|---|-----------|-----------|-----------|
| C | 3.635087  | 0.412507  | 1.837473  |
| C | 3.56765   | -1.720391 | 0.669448  |
| H | 1.607665  | -4.726873 | -0.807176 |
| C | 3.508779  | -3.846707 | -0.505046 |
| C | 4.297439  | -0.618979 | 1.179873  |
| H | 4.213507  | 1.239502  | 2.230242  |
| C | 4.232273  | -2.777599 | 0.009623  |
| H | 4.048327  | -4.644369 | -0.99877  |
| C | 5.745557  | -0.551883 | 0.984914  |
| C | 5.690087  | -2.762219 | -0.135437 |
| N | 6.329844  | -1.648286 | 0.408406  |
| O | 6.439586  | 0.423754  | 1.299982  |
| O | 6.350947  | -3.637643 | -0.668487 |
| H | -5.875511 | -1.660978 | 1.039271  |
| H | 7.329294  | -1.605602 | 0.258585  |
| N | -7.451257 | -3.053291 | -0.613466 |
| H | -8.172267 | -3.072148 | 0.099557  |
| H | -5.984943 | -3.457024 | -0.223003 |
| H | -7.748656 | -3.669876 | -1.362667 |
| H | -7.385357 | -2.106666 | -0.990664 |
| C | 0.688481  | 1.766198  | -0.98173  |
| C | 2.117765  | 1.760888  | -1.047237 |
| C | -0.035899 | 0.677686  | -1.545831 |
| C | 0.678615  | -0.374587 | -2.161974 |
| C | 0.022208  | 2.845817  | -0.329053 |
| C | 2.784029  | 0.685113  | -1.660836 |
| C | 2.849879  | 2.830369  | -0.453025 |
| C | -1.483885 | 0.667704  | -1.453834 |
| C | 2.053576  | -0.375784 | -2.216897 |
| H | 0.151362  | -1.215114 | -2.587007 |
| C | 0.798833  | 3.894347  | 0.235374  |
| C | -1.417096 | 2.84239   | -0.243347 |
| C | 4.235106  | 0.633332  | -1.675318 |
| C | 4.251663  | 2.772497  | -0.466202 |
| C | 2.166508  | 3.892272  | 0.181354  |
| C | -2.256255 | -0.386859 | -1.976186 |
| C | -2.146433 | 1.746679  | -0.799517 |
| H | 2.597395  | -1.196892 | -2.666522 |
| H | 0.311779  | 4.721231  | 0.728336  |
| C | -2.130736 | 3.87914   | 0.390844  |
| O | 4.932257  | -0.260771 | -2.139065 |
| N | 4.867292  | 1.738073  | -1.080321 |
| O | 4.975156  | 3.706475  | 0.097492  |
| H | 2.740099  | 4.694854  | 0.624503  |

|   |           |           |           |
|---|-----------|-----------|-----------|
| H | -1.781393 | -1.216262 | -2.477883 |
| C | -3.634514 | -0.413141 | -1.837976 |
| C | -3.567773 | 1.719612  | -0.669617 |
| H | -1.60875  | 4.726318  | 0.807806  |
| C | -3.509595 | 3.845723  | 0.505269  |
| C | -4.297199 | 0.61809   | -1.180312 |
| H | -4.212703 | -1.240204 | -2.230936 |
| C | -4.232757 | 2.77652   | -0.009678 |
| H | -4.049398 | 4.643119  | 0.999144  |
| C | -5.74536  | 0.550671  | -0.985815 |
| C | -5.690575 | 2.760714  | 0.135217  |
| N | -6.329983 | 1.646724  | -0.408997 |
| O | -6.439068 | -0.424972 | -1.301566 |
| O | -6.351782 | 3.635917  | 0.668189  |
| H | 5.875393  | 1.661694  | -1.036654 |
| H | -7.329492 | 1.603943  | -0.259606 |
| N | 7.450168  | 3.054005  | 0.616892  |
| H | 7.746744  | 3.670459  | 1.366534  |
| H | 7.384852  | 2.107135  | 0.993555  |
| H | 5.984116  | 3.457599  | 0.225926  |
| H | 8.171473  | 3.07378   | -0.095805 |

---

| $E_{\text{elec}}$ (a.u.) | $ZPE$ (a.u.) | $G_{\text{corr}}$ (a.u.) |          |
|--------------------------|--------------|--------------------------|----------|
|                          | -2773.753948 | 0.682658                 | 0.612889 |

---

Cartesian coordinates of pimer **10**

|   |           |           |           |
|---|-----------|-----------|-----------|
| O | 7.810394  | 2.011309  | -0.60875  |
| N | 7.527634  | 0.105681  | 0.577295  |
| H | 8.523357  | -0.05923  | 0.495371  |
| C | -0.611483 | -1.28477  | -1.188906 |
| C | 5.63166   | 1.558863  | 0.246761  |
| C | 0.802072  | -1.497786 | -1.250364 |
| C | -1.154215 | -0.052768 | -1.663791 |
| C | 7.055622  | 1.29036   | 0.037038  |
| C | 5.086916  | 2.753887  | -0.208423 |
| H | 5.742067  | 3.477764  | -0.675597 |
| C | -0.276374 | 0.927082  | -2.19808  |
| C | 6.794663  | -0.8921   | 1.218203  |
| C | -1.441563 | -2.300958 | -0.63922  |
| C | 4.80877   | 0.586584  | 0.861249  |
| C | 1.642083  | -0.475723 | -1.783307 |
| C | 1.347525  | -2.702662 | -0.774909 |

|   |           |           |           |
|---|-----------|-----------|-----------|
| C | -2.574457 | 0.176125  | -1.572163 |
| C | 3.732814  | 3.004953  | -0.065319 |
| C | 1.077431  | 0.731559  | -2.254905 |
| H | -0.667599 | 1.867311  | -2.553841 |
| O | 7.359704  | -1.900238 | 1.612893  |
| C | 5.356062  | -0.633856 | 1.330397  |
| C | -0.849931 | -3.508164 | -0.20251  |
| C | -2.867873 | -2.063228 | -0.521774 |
| C | 3.40802   | 0.831111  | 0.991854  |
| C | 3.026968  | -0.694188 | -1.80865  |
| C | 2.784233  | -2.924026 | -0.803351 |
| C | 0.509964  | -3.70558  | -0.263257 |
| C | -3.168763 | 1.375981  | -2.013826 |
| C | -3.408034 | -0.831029 | -0.991975 |
| H | 3.349623  | 3.944725  | -0.431691 |
| C | 2.867778  | 2.063255  | 0.521606  |
| H | 1.730721  | 1.499165  | -2.647352 |
| C | 4.531506  | -1.596885 | 1.902159  |
| H | -1.463669 | -4.302756 | 0.193475  |
| C | -3.732994 | -3.004953 | 0.064979  |
| C | 2.574509  | -0.176066 | 1.572099  |
| O | 3.841616  | 0.214329  | -2.285563 |
| N | 3.528729  | -1.859839 | -1.342849 |
| O | 3.376431  | -3.919871 | -0.414312 |
| H | 0.96081   | -4.628622 | 0.077372  |
| H | -2.56504  | 2.160635  | -2.442744 |
| C | -4.531363 | 1.597092  | -1.902146 |
| C | -4.808773 | -0.586426 | -0.861388 |
| C | 1.441477  | 2.300971  | 0.639197  |
| H | 4.97251   | -2.526125 | 2.238311  |
| C | 3.1689    | -1.375837 | 2.013882  |
| H | -3.349894 | -3.94482  | 0.431201  |
| C | -5.087082 | -2.75381  | 0.208082  |
| C | 1.154244  | 0.052725  | 1.663671  |
| C | -5.355991 | 0.634064  | -1.330491 |
| H | -4.972303 | 2.526387  | -2.238228 |
| C | -5.63173  | -1.55869  | -0.246966 |
| C | 0.849803  | 3.508223  | 0.202671  |
| C | 0.61145   | 1.28473   | 1.188867  |
| H | 2.565246  | -2.16046  | 2.442952  |
| H | -5.742293 | -3.4777   | 0.675153  |
| C | 0.276442  | -0.927231 | 2.197826  |
| C | -6.794592 | 0.89236   | -1.218376 |
| C | -7.055658 | -1.290076 | -0.037181 |

|   |           |           |           |
|---|-----------|-----------|-----------|
| H | 1.463515  | 4.302886  | -0.193212 |
| C | -0.510091 | 3.705618  | 0.263537  |
| C | -0.80211  | 1.497706  | 1.250415  |
| H | 0.667699  | -1.867514 | 2.553407  |
| C | -1.077371 | -0.73176  | 2.254685  |
| N | -7.527592 | -0.105326 | -0.577328 |
| O | -7.359602 | 1.900443  | -1.613228 |
| O | -7.810445 | -2.010998 | 0.608634  |
| C | -1.347608 | 2.702628  | 0.77512   |
| H | -0.960968 | 4.628707  | -0.076924 |
| C | -1.642074 | 0.475568  | 1.783278  |
| H | -1.730632 | -1.499452 | 2.647014  |
| C | -2.78431  | 2.923973  | 0.803713  |
| C | -3.026986 | 0.693981  | 1.80874   |
| N | -3.528765 | 1.859692  | 1.343098  |
| O | -3.376562 | 3.919872  | 0.414888  |
| O | -3.84155  | -0.214585 | 2.285628  |
| H | 4.530686  | -1.999007 | -1.308046 |
| H | -8.523307 | 0.059634  | -0.495407 |
| H | -4.530712 | 1.998915  | 1.308409  |
| N | -6.453428 | 0.318464  | 2.515473  |
| H | -6.899855 | -0.593617 | 2.43369   |
| H | -4.83274  | 0.044443  | 2.295716  |
| H | -6.957508 | 0.936712  | 1.88643   |
| H | -6.616007 | 0.651184  | 3.460805  |
| N | 6.453769  | -0.319337 | -2.514998 |
| H | 6.957947  | -0.937232 | -1.885692 |
| H | 6.899789  | 0.592958  | -2.433336 |
| H | 6.616766  | -0.652205 | -3.460202 |
| H | 4.832583  | -0.045054 | -2.295915 |

---

| $E_{\text{elec}}$ (a.u.) | $ZPE$ (a.u.) | $G_{\text{corr}}$ (a.u.) |          |
|--------------------------|--------------|--------------------------|----------|
|                          | -2773.74117  | 0.682664                 | 0.612431 |

---

Cartesian coordinates of pimer **11**

|   |           |           |           |
|---|-----------|-----------|-----------|
| O | 7.37779   | 1.335594  | 1.004284  |
| N | 7.423211  | -0.7828   | 0.218743  |
| H | 8.416152  | -0.670017 | 0.058411  |
| C | -0.465086 | 1.468181  | -1.045591 |
| C | 5.33714   | 0.099674  | 1.028379  |
| C | 0.957451  | 1.57237   | -1.15703  |
| C | -1.197072 | 2.513674  | -0.409908 |

|   |           |           |           |
|---|-----------|-----------|-----------|
| C | 6.764521  | 0.287805  | 0.771031  |
| C | 4.613522  | 1.091347  | 1.681762  |
| H | 5.131775  | 1.973203  | 2.036817  |
| C | -0.489529 | 3.639037  | 0.096901  |
| C | 6.874171  | -1.99707  | -0.198987 |
| C | -1.115171 | 0.308803  | -1.557172 |
| C | 4.690879  | -1.0854   | 0.596482  |
| C | 1.622267  | 2.710639  | -0.613078 |
| C | 1.685217  | 0.544052  | -1.782329 |
| C | -2.62935  | 2.400968  | -0.285697 |
| C | 3.247928  | 0.956334  | 1.872448  |
| C | 0.872097  | 3.736988  | 0.008942  |
| H | -1.026686 | 4.441143  | 0.578842  |
| O | 7.597972  | -2.850587 | -0.683914 |
| C | 5.42637   | -2.124158 | -0.013819 |
| C | -0.341555 | -0.695382 | -2.176506 |
| C | -2.552082 | 0.179822  | -1.407404 |
| C | 3.281238  | -1.222422 | 0.77191   |
| C | 3.019886  | 2.781246  | -0.711063 |
| C | 3.132891  | 0.631715  | -1.899356 |
| C | 1.026618  | -0.585278 | -2.287085 |
| C | -3.411901 | 3.40989   | 0.309508  |
| C | -3.281487 | 1.224545  | -0.769361 |
| H | 2.72461   | 1.751457  | 2.380854  |
| C | 2.551948  | -0.177808 | 1.410243  |
| H | 1.391956  | 4.59755   | 0.407892  |
| C | 4.781562  | -3.274893 | -0.450342 |
| H | -0.812459 | -1.586919 | -2.561206 |
| C | -3.247959 | -0.954462 | -1.86939  |
| C | 2.62901   | -2.398717 | 0.288062  |
| O | 3.685039  | 3.793617  | -0.215852 |
| N | 3.692787  | 1.797859  | -1.353548 |
| O | 3.874573  | -0.192232 | -2.414854 |
| H | 1.61831   | -1.362147 | -2.753829 |
| H | -2.951088 | 4.316461  | 0.669873  |
| C | -4.782046 | 3.277397  | 0.451947  |
| C | -4.691156 | 1.087547  | -0.594148 |
| C | 1.115029  | -0.306659 | 1.559952  |
| H | 5.373086  | -4.055496 | -0.910324 |
| C | 3.411431  | -3.407408 | -0.307702 |
| H | -2.724525 | -1.749774 | -2.377386 |
| C | -4.613589 | -1.089459 | -1.678889 |
| C | 1.196768  | -2.511493 | 0.412603  |
| C | -5.426754 | 2.126486  | 0.015733  |



|   |           |           |           |
|---|-----------|-----------|-----------|
| H | -5.373691 | 4.058173  | 0.91148   |
| C | -5.337334 | -0.097629 | -1.025895 |
| C | 0.341472  | 0.697638  | 2.179168  |
| C | 0.464862  | -1.465986 | 1.048358  |
| H | 2.950524  | -4.313772 | -0.66847  |
| H | -5.131784 | -1.971424 | -2.033767 |
| C | 0.489178  | -3.636943 | -0.093942 |
| C | -6.874568 | 1.999461  | 0.200663  |
| C | -6.764791 | -0.2857   | -0.768812 |
| H | 0.812402  | 1.589244  | 2.563673  |
| C | -1.026709 | 0.587632  | 2.289759  |
| C | -0.957676 | -1.570091 | 1.159847  |
| H | 1.02629   | -4.439213 | -0.575662 |
| C | -0.872438 | -3.734881 | -0.005849 |
| N | -7.423507 | 0.785028  | -0.216797 |
| O | -7.598525 | 2.853126  | 0.685093  |
| O | -7.378089 | -1.333434 | -1.002162 |
| C | -1.685376 | -0.541714 | 1.785126  |
| H | -1.61834  | 1.364592  | 2.756427  |
| C | -1.622556 | -2.708397 | 0.616028  |
| H | -1.392305 | -4.595555 | -0.404546 |
| C | -3.133061 | -0.629251 | 1.902139  |
| C | -3.020145 | -2.778866 | 0.714041  |
| N | -3.69302  | -1.795403 | 1.3564    |
| O | -3.874695 | 0.194795  | 2.417542  |
| O | -3.685345 | -3.791333 | 0.218936  |
| H | 4.703512  | 1.826267  | -1.39088  |
| H | -8.416524 | 0.672434  | -0.056802 |
| H | -4.703771 | -1.823579 | 1.393335  |
| N | -6.298803 | -3.752074 | 0.282874  |
| H | -6.727998 | -2.969919 | -0.221755 |
| H | -4.728537 | -3.721213 | 0.290377  |
| H | -6.743043 | -3.811763 | 1.193744  |
| H | -6.544281 | -4.601492 | -0.217297 |
| N | 6.297952  | 3.754888  | -0.278638 |
| H | 6.742425  | 3.814666  | -1.189367 |
| H | 6.72703   | 2.972517  | 0.22584   |
| H | 6.543337  | 4.604202  | 0.221754  |
| H | 4.728559  | 3.723476  | -0.286739 |

---

| $E_{\text{elec}}$ (a.u.) | $ZPE$ (a.u.) | $G_{\text{corr}}$ (a.u.) |          |
|--------------------------|--------------|--------------------------|----------|
|                          | -2773.751747 | 0.683025                 | 0.613895 |

---

Cartesian coordinates of different pimers on HS state PES

Cartesian coordinates of pimer **12**

|   |           |           |           |
|---|-----------|-----------|-----------|
| C | 0.694109  | 0.857586  | 1.602286  |
| C | 2.09495   | 0.63332   | 1.792604  |
| C | -0.227739 | -0.176666 | 1.940467  |
| C | 0.267542  | -1.381975 | 2.482946  |
| C | 0.247331  | 2.107466  | 1.082101  |
| C | 2.538625  | -0.595185 | 2.323609  |
| C | 3.021566  | 1.654338  | 1.454735  |
| C | -1.6382   | 0.035463  | 1.711011  |
| C | 1.618242  | -1.585307 | 2.672046  |
| H | -0.410477 | -2.177658 | 2.750709  |
| C | 1.20582   | 3.106857  | 0.798045  |
| C | -1.165046 | 2.322281  | 0.861014  |
| C | 3.96147   | -0.844263 | 2.519443  |
| C | 4.435264  | 1.418647  | 1.622051  |
| C | 2.552787  | 2.884316  | 0.980915  |
| C | -2.595752 | -0.960575 | 2.005553  |
| C | -2.083766 | 1.275252  | 1.165614  |
| H | 1.994523  | -2.51281  | 3.083837  |
| H | 0.891128  | 4.07458   | 0.4386    |
| C | -1.663956 | 3.532625  | 0.332894  |
| O | 4.450154  | -1.864392 | 2.980436  |
| N | 4.801982  | 0.206264  | 2.131017  |
| O | 5.338517  | 2.245483  | 1.340669  |
| H | 3.263069  | 3.677381  | 0.783502  |
| H | -2.28653  | -1.906291 | 2.422435  |
| C | -3.933962 | -0.769999 | 1.745968  |
| C | -3.47887  | 1.471897  | 0.909702  |
| H | -0.991219 | 4.343687  | 0.098999  |
| C | -3.010364 | 3.715232  | 0.094     |
| C | -4.399998 | 0.426378  | 1.188111  |
| H | -4.638852 | -1.555463 | 1.984881  |
| C | -3.923149 | 2.696002  | 0.371243  |
| H | -3.387377 | 4.644151  | -0.313976 |
| C | -5.798765 | 0.608824  | 0.882126  |
| C | -5.341065 | 2.911581  | 0.100442  |
| N | -6.17142  | 1.830941  | 0.412078  |
| O | -6.689357 | -0.269769 | 1.023284  |
| O | -5.831564 | 3.936189  | -0.348166 |
| H | 5.79358   | 0.041172  | 2.252354  |
| H | -7.145598 | 1.945916  | 0.16437   |
| N | 5.796847  | 3.555926  | -0.888663 |

|   |           |           |           |
|---|-----------|-----------|-----------|
| H | 5.055962  | 4.13477   | -1.27431  |
| H | 5.506898  | 3.131291  | 0.046722  |
| H | 6.003999  | 2.723837  | -1.526195 |
| H | 6.639471  | 4.112045  | -0.763525 |
| C | -0.671029 | -1.175154 | -1.395631 |
| C | -2.096115 | -1.276064 | -1.473196 |
| C | -0.032589 | 0.021766  | -1.837556 |
| C | -0.831731 | 1.095682  | -2.286382 |
| C | 0.080943  | -2.265343 | -0.869013 |
| C | -2.845427 | -0.17913  | -1.949344 |
| C | -2.737062 | -2.468565 | -1.048115 |
| C | 1.409392  | 0.100958  | -1.8149   |
| C | -2.205951 | 1.000116  | -2.33939  |
| H | -0.374645 | 2.030358  | -2.574524 |
| C | -0.60582  | -3.43158  | -0.458549 |
| C | 1.51857   | -2.15081  | -0.766767 |
| C | -4.296929 | -0.249615 | -1.990864 |
| C | -4.172391 | -2.553097 | -1.073859 |
| C | -1.977453 | -3.531733 | -0.546258 |
| C | 2.102632  | 1.208074  | -2.356536 |
| C | 2.16056   | -0.977715 | -1.262154 |
| H | -2.813877 | 1.832816  | -2.668882 |
| H | -0.055402 | -4.27799  | -0.077152 |
| C | 2.310959  | -3.16846  | -0.193555 |
| O | -5.054241 | 0.649861  | -2.333083 |
| N | -4.840571 | -1.475066 | -1.588747 |
| O | -4.832718 | -3.535713 | -0.644819 |
| H | -2.489432 | -4.431826 | -0.231597 |
| H | 1.555975  | 2.007997  | -2.832064 |
| C | 3.477596  | 1.276834  | -2.333694 |
| C | 3.588332  | -0.88901  | -1.214802 |
| H | 1.846728  | -4.048096 | 0.225552  |
| C | 3.685922  | -3.07014  | -0.13709  |
| C | 4.237843  | 0.256291  | -1.748214 |
| H | 3.988123  | 2.105911  | -2.808553 |
| C | 4.334868  | -1.948918 | -0.658337 |
| H | 4.287012  | -3.848982 | 0.313213  |
| C | 5.677346  | 0.337585  | -1.722801 |
| C | 5.792879  | -1.8913   | -0.637412 |
| N | 6.343657  | -0.726664 | -1.187979 |
| O | 6.345214  | 1.313009  | -2.151692 |
| O | 6.538765  | -2.751654 | -0.196516 |
| H | -5.849982 | -1.517843 | -1.634515 |
| H | 7.354453  | -0.675255 | -1.184236 |

|   |           |           |          |
|---|-----------|-----------|----------|
| N | -6.828561 | -2.901317 | 0.973759 |
| H | -6.73404  | -1.840552 | 1.076287 |
| H | -7.755125 | -3.125593 | 0.618183 |
| H | -6.07498  | -3.233196 | 0.287998 |
| H | -6.699597 | -3.357648 | 1.873664 |

---

| $E_{\text{elec}}$ (a.u.) | ZPE (a.u.)   | $G_{\text{corr}}$ (a.u.) |          |
|--------------------------|--------------|--------------------------|----------|
|                          | -2773.785559 | 0.683945                 | 0.614008 |

---

Cartesian coordinates of pimer **12-1**

|   |           |           |           |
|---|-----------|-----------|-----------|
| C | 0.700471  | 0.047765  | -1.783616 |
| C | 2.108726  | 0.282718  | -1.874592 |
| C | -0.193642 | 1.15985   | -1.731978 |
| C | 0.343334  | 2.468775  | -1.799431 |
| C | 0.21985   | -1.292072 | -1.735223 |
| C | 2.594546  | 1.614648  | -1.945905 |
| C | 2.996186  | -0.814125 | -1.871659 |
| C | -1.606881 | 0.920421  | -1.597746 |
| C | 1.697103  | 2.690154  | -1.907047 |
| H | -0.312266 | 3.325596  | -1.770214 |
| C | 1.149711  | -2.351069 | -1.722867 |
| C | -1.209721 | -1.531994 | -1.685271 |
| C | 4.008727  | 1.855168  | -2.002491 |
| C | 4.433188  | -0.590453 | -1.919055 |
| C | 2.508727  | -2.118615 | -1.781155 |
| C | -2.537714 | 1.98016   | -1.49061  |
| C | -2.095657 | -0.422671 | -1.582786 |
| H | 2.092823  | 3.696076  | -1.960459 |
| H | 0.8103    | -3.372367 | -1.640086 |
| C | -1.748578 | -2.833389 | -1.73666  |
| O | 4.535267  | 2.99992   | -2.015083 |
| N | 4.817668  | 0.749812  | -2.033947 |
| O | 5.300622  | -1.452583 | -1.866617 |
| H | 3.219263  | -2.93461  | -1.750026 |
| H | -2.19903  | 3.004551  | -1.50148  |
| C | -3.885321 | 1.742413  | -1.347067 |
| C | -3.501595 | -0.661392 | -1.46433  |
| H | -1.098194 | -3.686361 | -1.857895 |
| C | -3.108515 | -3.054408 | -1.64572  |
| C | -4.392482 | 0.436802  | -1.316559 |
| H | -4.56821  | 2.57852   | -1.274625 |
| C | -3.988593 | -1.983417 | -1.49265  |

|   |           |           |           |
|---|-----------|-----------|-----------|
| H | -3.51856  | -4.055305 | -1.685108 |
| C | -5.801379 | 0.19012   | -1.132967 |
| C | -5.42125  | -2.244351 | -1.37249  |
| N | -6.215651 | -1.104992 | -1.211581 |
| O | -6.667168 | 1.078282  | -0.91167  |
| O | -5.948597 | -3.344331 | -1.410849 |
| H | 5.817091  | 0.891418  | -2.093155 |
| H | -7.198945 | -1.279929 | -1.049462 |
| N | 6.596779  | 3.357042  | -0.404257 |
| H | 7.4934    | 3.446814  | -0.876549 |
| H | 5.802216  | 3.262829  | -1.120577 |
| H | 6.59758   | 2.47078   | 0.200067  |
| H | 6.443528  | 4.180016  | 0.173377  |
| C | -0.700484 | 0.050617  | 1.783307  |
| C | -2.108712 | 0.285775  | 1.874147  |
| C | -0.219948 | -1.289297 | 1.736393  |
| C | -1.14988  | -2.348247 | 1.725309  |
| C | 0.193702  | 1.162579  | 1.730353  |
| C | -2.996233 | -0.811006 | 1.872535  |
| C | -2.594429 | 1.617823  | 1.944052  |
| C | 1.209604  | -1.52938  | 1.686665  |
| C | -2.508863 | -2.115634 | 1.783464  |
| H | -0.810551 | -3.369662 | 1.643684  |
| C | -0.343191 | 2.471618  | 1.796149  |
| C | 1.606938  | 0.922907  | 1.596552  |
| C | -4.433201 | -0.587169 | 1.919823  |
| C | -4.008572 | 1.858506  | 2.000432  |
| C | -1.69693  | 2.69322   | 1.903681  |
| C | 1.748357  | -2.830745 | 1.739505  |
| C | 2.095622  | -0.420227 | 1.583001  |
| H | -3.219455 | -2.931615 | 1.753332  |
| H | 0.312429  | 3.328376  | 1.765646  |
| C | 2.537869  | 1.982473  | 1.48862   |
| O | -5.300707 | -1.449296 | 1.868392  |
| N | -4.817582 | 0.753246  | 2.0333    |
| O | -4.53497  | 3.003373  | 2.011756  |
| H | -2.092567 | 3.699237  | 1.955903  |
| H | 1.097911  | -3.683534 | 1.861679  |
| C | 3.108289  | -3.051968 | 1.648882  |
| C | 3.501549  | -0.659175 | 1.464948  |
| H | 2.199308  | 3.006909  | 1.498683  |
| C | 3.885472  | 1.744486  | 1.345507  |
| C | 3.988441  | -1.981209 | 1.494731  |
| H | 3.518245  | -4.052855 | 1.689347  |

|   |           |           |           |
|---|-----------|-----------|-----------|
| C | 4.39253   | 0.438815  | 1.316212  |
| H | 4.568418  | 2.580488  | 1.272415  |
| C | 5.421073  | -2.242371 | 1.374943  |
| C | 5.801456  | 0.191869  | 1.133191  |
| N | 6.215604  | -1.10319  | 1.213183  |
| O | 5.948344  | -3.342341 | 1.414218  |
| O | 6.667388  | 1.079731  | 0.911236  |
| H | -5.816999 | 0.894941  | 2.092407  |
| H | 7.198919  | -1.278392 | 1.051459  |
| N | -6.596785 | 3.357113  | 0.401066  |
| H | -6.597419 | 2.470209  | -0.202252 |
| H | -7.493369 | 3.447241  | 0.873356  |
| H | -5.801921 | 3.264115  | 1.117471  |
| H | -6.443806 | 4.179467  | -0.177532 |

---

| $E_{\text{elec}}$ (a.u.) | $ZPE$ (a.u.) | $G_{\text{corr}}$ (a.u.) |          |
|--------------------------|--------------|--------------------------|----------|
| -2773.785604             |              | 0.683332                 | 0.613349 |

---

Cartesian coordinates of pimer **12-2**

|   |           |           |          |
|---|-----------|-----------|----------|
| C | 0.58272   | 0.829035  | 1.573213 |
| C | 1.990855  | 0.648458  | 1.749374 |
| C | -0.305744 | -0.210826 | 1.96867  |
| C | 0.224418  | -1.374627 | 2.559505 |
| C | 0.095363  | 2.049264  | 1.010575 |
| C | 2.472414  | -0.541918 | 2.330266 |
| C | 2.888274  | 1.674065  | 1.347891 |
| C | -1.730715 | -0.044778 | 1.751215 |
| C | 1.584264  | -1.536105 | 2.737727 |
| H | -0.431762 | -2.167367 | 2.884321 |
| C | 1.029228  | 3.04438   | 0.638332 |
| C | -1.322181 | 2.234558  | 0.842208 |
| C | 3.906062  | -0.745493 | 2.518075 |
| C | 4.309384  | 1.488714  | 1.519288 |
| C | 2.384058  | 2.85985   | 0.805078 |
| C | -2.652635 | -1.064085 | 2.062678 |
| C | -2.212417 | 1.175918  | 1.198034 |
| H | 1.988547  | -2.4326   | 3.18977  |
| H | 0.689497  | 3.977583  | 0.215447 |
| C | -1.86651  | 3.439332  | 0.330319 |
| O | 4.424542  | -1.732265 | 3.015049 |
| N | 4.71356   | 0.309752  | 2.079078 |
| O | 5.185717  | 2.329503  | 1.20366  |

|   |           |           |           |
|---|-----------|-----------|-----------|
| H | 3.075452  | 3.647327  | 0.532662  |
| H | -2.308585 | -2.008432 | 2.455109  |
| C | -4.007051 | -0.903383 | 1.849889  |
| C | -3.618389 | 1.341242  | 0.990915  |
| H | -1.218697 | 4.271975  | 0.101155  |
| C | -3.219496 | 3.594429  | 0.133946  |
| C | -4.500235 | 0.292939  | 1.324479  |
| H | -4.707672 | -1.697664 | 2.074765  |
| C | -4.111474 | 2.554407  | 0.439452  |
| H | -3.61957  | 4.535186  | -0.225451 |
| C | -5.936545 | 0.442227  | 1.108898  |
| C | -5.521462 | 2.709127  | 0.206568  |
| N | -6.33112  | 1.685562  | 0.610052  |
| O | -6.781713 | -0.416416 | 1.317669  |
| O | -6.042554 | 3.703842  | -0.366664 |
| H | 5.709866  | 0.179703  | 2.20374   |
| H | -7.321153 | 1.791507  | 0.429372  |
| N | 5.800088  | 3.556991  | -1.047714 |
| H | 5.113     | 4.156564  | -1.495525 |
| H | 5.436693  | 3.178754  | -0.125073 |
| H | 6.012724  | 2.689119  | -1.648675 |
| H | 6.657728  | 4.078879  | -0.883285 |
| C | -0.68896  | -1.121414 | -1.414545 |
| C | -2.114277 | -1.215042 | -1.495931 |
| C | -0.03464  | 0.05938   | -1.881658 |
| C | -0.827732 | 1.129871  | -2.354787 |
| C | 0.051732  | -2.207821 | -0.868973 |
| C | -2.865413 | -0.120322 | -2.000756 |
| C | -2.758593 | -2.393379 | -1.068989 |
| C | 1.402684  | 0.125324  | -1.864809 |
| C | -2.200513 | 1.039518  | -2.409813 |
| H | -0.362412 | 2.056125  | -2.657325 |
| C | -0.640581 | -3.363113 | -0.455392 |
| C | 1.494351  | -2.098521 | -0.757867 |
| C | -4.306894 | -0.203335 | -2.049364 |
| C | -4.214721 | -2.499074 | -1.122607 |
| C | -2.015615 | -3.456227 | -0.558544 |
| C | 2.109203  | 1.208561  | -2.442472 |
| C | 2.145708  | -0.945664 | -1.280347 |
| H | -2.778249 | 1.881223  | -2.766333 |
| H | -0.099017 | -4.209619 | -0.061465 |
| C | 2.273179  | -3.105811 | -0.152854 |
| O | -5.06623  | 0.712665  | -2.446752 |
| N | -4.871631 | -1.374615 | -1.630842 |

|   |           |           |           |
|---|-----------|-----------|-----------|
| O | -4.86631  | -3.467619 | -0.765248 |
| H | -2.542256 | -4.347749 | -0.243065 |
| H | 1.57096   | 1.995412  | -2.949072 |
| C | 3.483138  | 1.266634  | -2.417407 |
| C | 3.573566  | -0.866156 | -1.230418 |
| H | 1.798439  | -3.968585 | 0.288971  |
| C | 3.649285  | -3.017249 | -0.093083 |
| C | 4.235197  | 0.259492  | -1.794116 |
| H | 4.002455  | 2.074293  | -2.919158 |
| C | 4.308315  | -1.915653 | -0.642013 |
| H | 4.242348  | -3.788309 | 0.380695  |
| C | 5.671194  | 0.329634  | -1.763284 |
| C | 5.767756  | -1.869088 | -0.617281 |
| N | 6.32854   | -0.723755 | -1.195974 |
| O | 6.352853  | 1.288647  | -2.216067 |
| O | 6.504482  | -2.723466 | -0.151084 |
| H | -5.883531 | -1.420199 | -1.622275 |
| H | 7.339664  | -0.679654 | -1.190661 |
| N | -5.290285 | 3.315299  | -2.86789  |
| H | -5.597115 | 3.637429  | -1.896854 |
| H | -4.481163 | 3.844023  | -3.182153 |
| H | -5.060436 | 2.281928  | -2.77562  |
| H | -6.054961 | 3.432832  | -3.528734 |

---

| $E_{\text{elec}}$ (a.u.) | $ZPE$ (a.u.) | $G_{\text{corr}}$ (a.u.) |          |
|--------------------------|--------------|--------------------------|----------|
|                          | -2773.779924 | 0.683829                 | 0.613065 |

---

Cartesian coordinates of pimer **12-3**

|   |           |           |          |
|---|-----------|-----------|----------|
| C | -0.698737 | -0.18969  | 1.829154 |
| C | -2.076538 | 0.19335   | 1.939715 |
| C | 0.295997  | 0.819307  | 1.682376 |
| C | -0.103715 | 2.180184  | 1.652979 |
| C | -0.351023 | -1.571594 | 1.876961 |
| C | -2.423775 | 1.564176  | 1.901647 |
| C | -3.069955 | -0.806325 | 2.101441 |
| C | 1.686211  | 0.432734  | 1.568589 |
| C | -1.419772 | 2.545097  | 1.76106  |
| H | 0.636226  | 2.95665   | 1.534056 |
| C | -1.374859 | -2.529822 | 2.100035 |
| C | 1.029605  | -1.962925 | 1.719623 |
| C | -3.794363 | 1.951261  | 2.026021 |
| C | -4.439205 | -0.425304 | 2.190537 |



|   |           |           |           |
|---|-----------|-----------|-----------|
| C | -2.688689 | -2.161974 | 2.211143  |
| C | 2.71769   | 1.380108  | 1.433092  |
| C | 2.026188  | -0.952564 | 1.576674  |
| H | -1.714091 | 3.585731  | 1.741063  |
| H | -1.120283 | -3.572608 | 2.214783  |
| C | 1.426663  | -3.313616 | 1.685817  |
| O | -4.219169 | 3.134757  | 2.046327  |
| N | -4.70411  | 0.923925  | 2.147919  |
| O | -5.426477 | -1.205663 | 2.313696  |
| H | -3.44587  | -2.903592 | 2.432413  |
| H | 2.493748  | 2.435768  | 1.425002  |
| C | 4.042705  | 0.996777  | 1.27648   |
| C | 3.391682  | -1.337963 | 1.421117  |
| H | 0.692577  | -4.100486 | 1.771879  |
| C | 2.75621   | -3.677667 | 1.53041   |
| C | 4.387661  | -0.347296 | 1.262012  |
| H | 4.824178  | 1.735573  | 1.147447  |
| C | 3.739633  | -2.707404 | 1.402439  |
| H | 3.052414  | -4.718353 | 1.504936  |
| C | 5.79163   | -0.73503  | 1.036243  |
| C | 5.144684  | -3.120074 | 1.237772  |
| N | 6.061253  | -2.087787 | 1.127846  |
| O | 6.684001  | 0.063487  | 0.789385  |
| O | 5.513225  | -4.283701 | 1.21289   |
| H | -5.676174 | 1.183204  | 2.252944  |
| H | 7.013855  | -2.3634   | 0.927117  |
| N | -5.869951 | -3.253506 | 0.767014  |
| H | -5.106026 | -3.916328 | 0.665243  |
| H | -5.612695 | -2.47581  | 1.472003  |
| H | -6.060105 | -2.758444 | -0.153391 |
| H | -6.707187 | -3.739928 | 1.078468  |
| C | 0.750032  | 0.598494  | -1.781277 |
| C | 2.174577  | 0.611827  | -1.862399 |
| C | 0.068333  | -0.650617 | -1.688661 |
| C | 0.827971  | -1.835357 | -1.677186 |
| C | 0.0407    | 1.835926  | -1.776083 |
| C | 2.889682  | -0.606054 | -1.845315 |
| C | 2.864373  | 1.843475  | -1.935619 |
| C | -1.375511 | -0.660582 | -1.604009 |
| C | 2.212708  | -1.81371  | -1.755202 |
| H | 0.343078  | -2.795146 | -1.584458 |
| C | 0.774529  | 3.035402  | -1.848499 |
| C | -1.399823 | 1.820876  | -1.685649 |
| C | 4.362406  | -0.603347 | -1.856868 |

|   |           |           |           |
|---|-----------|-----------|-----------|
| C | 4.337222  | 1.875462  | -1.954688 |
| C | 2.159845  | 3.037991  | -1.927748 |
| C | -2.110227 | -1.873102 | -1.56337  |
| C | -2.085268 | 0.575145  | -1.59169  |
| H | 2.787619  | -2.730328 | -1.724758 |
| H | 0.266877  | 3.987846  | -1.835923 |
| C | -2.159187 | 3.020152  | -1.714853 |
| O | 5.041593  | -1.616831 | -1.776883 |
| N | 4.963801  | 0.640134  | -1.944176 |
| O | 4.9927    | 2.905824  | -1.967902 |
| H | 2.715594  | 3.96557   | -1.975565 |
| H | -1.591526 | -2.818416 | -1.606228 |
| C | -3.478422 | -1.881582 | -1.502452 |
| C | -3.517776 | 0.563842  | -1.505069 |
| H | -1.661123 | 3.970151  | -1.833563 |
| C | -3.524623 | 3.007617  | -1.627929 |
| C | -4.205355 | -0.672302 | -1.453189 |
| H | -4.021228 | -2.817809 | -1.53418  |
| C | -4.230456 | 1.790142  | -1.500163 |
| H | -4.082333 | 3.931348  | -1.712754 |
| C | -5.635502 | -0.686624 | -1.394129 |
| C | -5.65428  | 1.777941  | -1.40787  |
| N | -6.255194 | 0.542211  | -1.385468 |
| O | -6.360515 | -1.713254 | -1.339973 |
| O | -6.403154 | 2.794177  | -1.336382 |
| H | 5.97349   | 0.65309   | -1.85415  |
| H | -7.266195 | 0.533323  | -1.337559 |
| N | -5.740991 | 4.602543  | 0.438044  |
| H | -5.13896  | 4.042868  | 1.10604   |
| H | -5.216928 | 5.40214   | 0.092281  |
| H | -6.01301  | 3.939633  | -0.367405 |
| H | -6.576977 | 4.929932  | 0.915999  |

---

| $E_{\text{elec}}$ (a.u.) | $ZPE$ (a.u.) | $G_{\text{corr}}$ (a.u.) |          |
|--------------------------|--------------|--------------------------|----------|
|                          | -2773.756246 | 0.682805                 | 0.612551 |

---

Cartesian coordinates of pimer **12-4**

|   |           |          |          |
|---|-----------|----------|----------|
| C | -0.942523 | 1.410953 | 1.341236 |
| C | -2.344249 | 1.676243 | 1.309323 |
| C | -0.034242 | 2.4053   | 0.871378 |
| C | -0.554729 | 3.620572 | 0.386828 |
| C | -0.481972 | 0.150988 | 1.824952 |

|   |           |           |           |
|---|-----------|-----------|-----------|
| C | -2.815809 | 2.913772  | 0.815101  |
| C | -3.255076 | 0.690765  | 1.749901  |
| C | 1.382815  | 2.131721  | 0.895547  |
| C | -1.919494 | 3.869427  | 0.360441  |
| H | 0.106423  | 4.388375  | 0.014906  |
| C | -1.431165 | -0.795836 | 2.253417  |
| C | 0.939335  | -0.115586 | 1.85401   |
| C | -4.261926 | 3.177078  | 0.715881  |
| C | -4.706112 | 0.924709  | 1.656017  |
| C | -2.792216 | -0.530663 | 2.21763   |
| C | 2.334041  | 3.097878  | 0.474264  |
| C | 1.847695  | 0.873925  | 1.377631  |
| H | -2.310505 | 4.80378   | -0.021221 |
| H | -1.115759 | -1.76718  | 2.60255   |
| C | 1.458711  | -1.328543 | 2.374359  |
| O | -4.73367  | 4.204178  | 0.253208  |
| N | -5.088501 | 2.165421  | 1.1765    |
| O | -5.546925 | 0.089655  | 1.957014  |
| H | -3.514046 | -1.274142 | 2.530398  |
| H | 2.004489  | 4.072834  | 0.149675  |
| C | 3.677492  | 2.839763  | 0.49581   |
| C | 3.257557  | 0.606792  | 1.403731  |
| H | 0.788097  | -2.074971 | 2.771391  |
| C | 2.805767  | -1.572299 | 2.41839   |
| C | 4.167325  | 1.59023   | 0.937752  |
| H | 4.383114  | 3.614195  | 0.224298  |
| C | 3.726362  | -0.624879 | 1.920244  |
| H | 3.182905  | -2.478415 | 2.875502  |
| C | 5.568493  | 1.321481  | 0.959423  |
| C | 5.133358  | -0.882935 | 1.971986  |
| N | 5.951777  | 0.11545   | 1.495157  |
| O | 6.47894   | 2.084188  | 0.525641  |
| O | 5.674044  | -1.935005 | 2.40037   |
| H | -6.08155  | 2.294463  | 1.018553  |
| H | 6.946667  | -0.068184 | 1.526445  |
| N | 4.921217  | -4.105759 | 1.06945   |
| H | 5.657447  | -4.806964 | 1.041272  |
| H | 5.198461  | -3.314856 | 1.722211  |
| H | 4.804066  | -3.655312 | 0.094238  |
| H | 4.051589  | -4.533314 | 1.376487  |
| C | 0.347676  | -1.01132  | -1.516756 |
| C | 1.769947  | -0.921317 | -1.679143 |
| C | -0.223943 | -2.217142 | -1.014719 |
| C | 0.626788  | -3.323876 | -0.754605 |

|   |           |           |           |
|---|-----------|-----------|-----------|
| C | -0.466259 | 0.103756  | -1.867734 |
| C | 2.58419   | -2.033771 | -1.344817 |
| C | 2.339412  | 0.270687  | -2.184876 |
| C | -1.649829 | -2.293303 | -0.802842 |
| C | 1.983467  | -3.237892 | -0.915344 |
| H | 0.202803  | -4.26872  | -0.449856 |
| C | 0.153376  | 1.275575  | -2.373219 |
| C | -1.901353 | 0.01388   | -1.701149 |
| C | 3.997937  | -1.934029 | -1.483558 |
| C | 3.75539   | 0.360114  | -2.360659 |
| C | 1.511801  | 1.359616  | -2.530063 |
| C | -2.264386 | -3.42822  | -0.239217 |
| C | -2.465536 | -1.178537 | -1.158441 |
| H | 2.607157  | -4.109193 | -0.760143 |
| H | -0.447232 | 2.133088  | -2.634679 |
| C | -2.762122 | 1.073727  | -2.041244 |
| O | 4.84278   | -2.831386 | -1.201186 |
| N | 4.482683  | -0.747371 | -1.983018 |
| O | 4.369538  | 1.348927  | -2.836621 |
| H | 1.97476   | 2.256776  | -2.918316 |
| H | -1.670521 | -4.278847 | 0.05945   |
| C | -3.635574 | -3.488676 | -0.037738 |
| C | -3.875625 | -1.252794 | -0.95052  |
| H | -2.366969 | 1.988254  | -2.456122 |
| C | -4.132042 | 0.995642  | -1.830638 |
| C | -4.445001 | -2.418539 | -0.390388 |
| H | -4.099629 | -4.364712 | 0.396663  |
| C | -4.694047 | -0.149242 | -1.283649 |
| H | -4.780661 | 1.828684  | -2.072522 |
| C | -5.898679 | -2.507178 | -0.165415 |
| C | -6.142393 | -0.190162 | -1.013518 |
| N | -6.631946 | -1.398857 | -0.554963 |
| O | -6.454374 | -3.482949 | 0.31376   |
| O | -6.890185 | 0.762652  | -1.180508 |
| H | 5.484534  | -0.704889 | -2.115768 |
| H | -7.616697 | -1.417848 | -0.323417 |
| N | 6.149449  | 3.071436  | -1.876481 |
| H | 6.298212  | 2.768783  | -0.852436 |
| H | 7.029971  | 3.027134  | -2.38357  |
| H | 5.453619  | 2.392747  | -2.297839 |
| H | 5.779511  | 4.016998  | -1.9281   |

| $E_{\text{elec}}$ (a.u.) | $ZPE$ (a.u.) | $G_{\text{corr}}$ (a.u.) |          |
|--------------------------|--------------|--------------------------|----------|
|                          | -2773.756484 | 0.68278                  | 0.612438 |

Cartesian coordinates of pimer **13**

|   |           |           |           |
|---|-----------|-----------|-----------|
| O | 0.159382  | -6.134098 | -1.817481 |
| N | -1.929206 | -5.261316 | -1.742935 |
| H | -2.29785  | -6.200043 | -1.811192 |
| C | 0.49121   | -1.333209 | 1.719012  |
| C | -0.07175  | -3.759298 | -1.761751 |
| C | 0.987785  | -2.67513  | 1.725856  |
| C | 1.415953  | -0.247478 | 1.70122   |
| C | -0.568881 | -5.108997 | -1.776328 |
| C | 1.306906  | -3.51405  | -1.771131 |
| H | 1.986699  | -4.356136 | -1.793832 |
| C | 2.799107  | -0.529585 | 1.65972   |
| C | -2.903029 | -4.257011 | -1.689263 |
| C | -0.917401 | -1.108828 | 1.723178  |
| C | -0.987774 | -2.675119 | -1.726135 |
| C | 2.380444  | -2.901409 | 1.693238  |
| C | 0.071762  | -3.759305 | 1.761699  |
| C | 0.917401  | 1.108828  | 1.723178  |
| C | 1.786961  | -2.223167 | -1.748042 |
| C | 3.27035   | -1.824514 | 1.653606  |
| H | 3.516786  | 0.275366  | 1.623506  |
| O | -4.084016 | -4.579376 | -1.649838 |
| C | -2.380444 | -2.901385 | -1.693406 |
| C | -1.786961 | -2.223227 | 1.747374  |
| C | -1.415953 | 0.247478  | 1.70122   |
| C | -0.491215 | -1.333219 | -1.719505 |
| C | 2.90303   | -4.25708  | 1.689414  |
| C | 0.568851  | -5.108998 | 1.776824  |
| C | -1.306895 | -3.514088 | 1.770785  |
| C | 1.786961  | 2.223227  | 1.747374  |
| C | -0.49121  | 1.333209  | 1.719012  |
| H | 2.8563    | -2.079912 | -1.747261 |
| C | 0.917381  | -1.108813 | -1.723752 |
| H | 4.331786  | -2.034524 | 1.621952  |
| C | -3.270308 | -1.824437 | -1.653749 |
| H | -2.856299 | -2.080089 | 1.746225  |
| C | -2.799107 | 0.529585  | 1.65972   |
| C | -1.415912 | -0.247453 | -1.701724 |
| O | 4.084038  | -4.579408 | 1.650088  |

|   |           |           |           |
|---|-----------|-----------|-----------|
| N | 1.929232  | -5.261324 | 1.743361  |
| O | -0.159317 | -6.13411  | 1.818459  |
| H | -1.986655 | -4.356204 | 1.793531  |
| H | 2.856299  | 2.080089  | 1.746225  |
| C | 1.306895  | 3.514088  | 1.770785  |
| C | -0.987785 | 2.67513   | 1.725856  |
| C | 1.415912  | 0.247453  | -1.701724 |
| H | -4.331753 | -2.034374 | -1.621907 |
| C | -2.799057 | -0.529514 | -1.65995  |
| H | -3.516786 | -0.275366 | 1.623506  |
| C | -3.27035  | 1.824514  | 1.653606  |
| C | -0.917381 | 1.108813  | -1.723752 |
| C | -0.071762 | 3.759305  | 1.761699  |
| H | 1.986655  | 4.356204  | 1.793531  |
| C | -2.380444 | 2.901409  | 1.693238  |
| C | 2.799057  | 0.529514  | -1.65995  |
| C | 0.491215  | 1.333219  | -1.719505 |
| H | -3.516675 | 0.275501  | -1.623512 |
| H | -4.331786 | 2.034524  | 1.621952  |
| C | -1.786961 | 2.223167  | -1.748042 |
| C | -0.568851 | 5.108998  | 1.776824  |
| C | -2.90303  | 4.25708   | 1.689414  |
| H | 3.516675  | -0.275501 | -1.623512 |
| C | 3.270308  | 1.824437  | -1.653749 |
| C | 0.987774  | 2.675119  | -1.726135 |
| H | -2.8563   | 2.079912  | -1.747261 |
| C | -1.306906 | 3.51405   | -1.771131 |
| N | -1.929232 | 5.261324  | 1.743361  |
| O | 0.159317  | 6.13411   | 1.818459  |
| O | -4.084038 | 4.579408  | 1.650088  |
| C | 2.380444  | 2.901385  | -1.693406 |
| H | 4.331753  | 2.034374  | -1.621907 |
| C | 0.07175   | 3.759298  | -1.761751 |
| H | -1.986699 | 4.356136  | -1.793832 |
| C | 2.903029  | 4.257011  | -1.689263 |
| C | 0.568881  | 5.108997  | -1.776328 |
| N | 1.929206  | 5.261316  | -1.742935 |
| O | 4.084016  | 4.579376  | -1.649838 |
| O | -0.159382 | 6.134098  | -1.817481 |
| H | 2.297851  | -6.200011 | 1.812324  |
| H | -2.297851 | 6.200011  | 1.812324  |
| H | 2.29785   | 6.200043  | -1.811192 |
| N | -0.00134  | 8.019375  | 0.000391  |
| H | 0.827783  | 8.607784  | 0.013647  |

|   |           |           |           |
|---|-----------|-----------|-----------|
| H | -0.002222 | 7.363142  | -0.845039 |
| H | 0.001596  | 7.362499  | 0.845315  |
| H | -0.832692 | 8.60466   | -0.012445 |
| N | 0.00134   | -8.019375 | 0.000391  |
| H | -0.827783 | -8.607784 | 0.013647  |
| H | 0.002222  | -7.363142 | -0.845039 |
| H | -0.001596 | -7.362499 | 0.845315  |
| H | 0.832692  | -8.60466  | -0.012445 |

Cartesian coordinates of pimer **14**

|   |           |           |           |
|---|-----------|-----------|-----------|
| O | -6.586124 | 2.495802  | -0.187991 |
| N | -6.207863 | 0.560888  | -1.293975 |
| H | -7.209037 | 0.412797  | -1.289452 |
| C | -0.760512 | -1.527713 | 1.185549  |
| C | -4.330147 | 1.92161   | -0.714339 |
| C | -2.176625 | -1.734386 | 1.170089  |
| C | -0.233703 | -0.321356 | 1.731209  |
| C | -5.75485  | 1.708326  | -0.709961 |
| C | -3.788219 | 3.119729  | -0.227089 |
| H | -4.461244 | 3.909437  | 0.086568  |
| C | -1.131272 | 0.638626  | 2.248113  |
| C | -5.441029 | -0.48349  | -1.822009 |
| C | 0.096647  | -2.534452 | 0.647923  |
| C | -3.469454 | 0.91988   | -1.236222 |
| C | -3.03738  | -0.738119 | 1.698123  |
| C | -2.701519 | -2.928    | 0.630897  |
| C | 1.197614  | -0.110338 | 1.742311  |
| C | -2.426222 | 3.321212  | -0.209954 |
| C | -2.493607 | 0.432303  | 2.233349  |
| H | -0.758725 | 1.563814  | 2.660396  |
| O | -6.003264 | -1.47458  | -2.263162 |
| C | -3.997649 | -0.271264 | -1.776093 |
| C | -0.483106 | -3.698825 | 0.098561  |
| C | 1.525832  | -2.335622 | 0.681901  |
| C | -2.052868 | 1.123833  | -1.218048 |
| C | -4.470058 | -0.937146 | 1.66048   |
| C | -4.142169 | -3.156521 | 0.603924  |
| C | -1.849598 | -3.89384  | 0.096793  |
| C | 1.775498  | 1.068966  | 2.259258  |
| C | 2.052891  | -1.123881 | 1.21808   |
| H | -2.054016 | 4.269978  | 0.145419  |
| C | -1.525826 | 2.33554   | -0.681774 |
| H | -3.155788 | 1.185764  | 2.638469  |

|   |           |           |           |
|---|-----------|-----------|-----------|
| C | -3.142087 | -1.25664  | -2.275509 |
| H | 0.140657  | -4.469246 | -0.328666 |
| C | 2.426214  | -3.321347 | 0.210165  |
| C | -1.197579 | 0.110351  | -1.742377 |
| O | -5.319355 | -0.118528 | 2.082604  |
| N | -4.91382  | -2.112652 | 1.126584  |
| O | -4.694157 | -4.158241 | 0.177612  |
| H | -2.28803  | -4.791827 | -0.319203 |
| H | 1.150282  | 1.860048  | 2.643412  |
| C | 3.142139  | 1.256687  | 2.275294  |
| C | 3.46948   | -0.919944 | 1.236234  |
| C | -0.096646 | 2.534402  | -0.647816 |
| H | -3.578466 | -2.166866 | -2.667441 |
| C | -1.775449 | -1.068903 | -2.259452 |
| H | 2.053995  | -4.270135 | -0.145136 |
| C | 3.788215  | -3.119883 | 0.227291  |
| C | 0.233735  | 0.321387  | -1.731255 |
| C | 3.997691  | 0.271251  | 1.775983  |
| H | 3.578531  | 2.166953  | 2.66712   |
| C | 4.330159  | -1.921731 | 0.71444   |
| C | 0.48309   | 3.698758  | -0.0984   |
| C | 0.760527  | 1.52772   | -1.185529 |
| H | -1.150224 | -1.859935 | -2.643696 |
| H | 4.461233  | -3.909628 | -0.08629  |
| C | 1.131317  | -0.63856  | -2.248199 |
| C | 5.441074  | 0.483474  | 1.821849  |
| C | 5.754876  | -1.708469 | 0.710033  |
| H | -0.140681 | 4.469129  | 0.328905  |
| C | 1.849576  | 3.89381   | -0.096658 |
| C | 2.176636  | 1.734422  | -1.170079 |
| H | 0.758788  | -1.56376  | -2.660472 |
| C | 2.493647  | -0.432212 | -2.23344  |
| N | 6.207897  | -0.560971 | 1.293952  |
| O | 6.003313  | 1.474628  | 2.262862  |
| O | 6.586126  | -2.495979 | 0.188115  |
| C | 2.70151   | 2.928019  | -0.63083  |
| H | 2.287995  | 4.791782  | 0.319386  |
| C | 3.037406  | 0.738199  | -1.698173 |
| H | 3.155829  | -1.185652 | -2.638591 |
| C | 4.142154  | 3.156566  | -0.603854 |
| C | 4.470076  | 0.93726   | -1.660539 |
| N | 4.91382   | 2.112736  | -1.126592 |
| O | 4.694131  | 4.1583    | -0.177572 |
| O | 5.319404  | 0.118652  | -2.082655 |



|   |           |           |           |
|---|-----------|-----------|-----------|
| H | -5.916217 | -2.247911 | 1.082978  |
| H | 7.209071  | -0.412885 | 1.289394  |
| H | 5.916215  | 2.247999  | -1.082938 |
| N | 5.890405  | -2.452568 | -2.358049 |
| H | 5.160482  | -3.106679 | -2.62782  |
| H | 5.523495  | -1.459203 | -2.347979 |
| H | 6.216727  | -2.64322  | -1.358656 |
| H | 6.674341  | -2.52028  | -3.002973 |
| N | -5.890732 | 2.452711  | 2.358064  |
| H | -5.523562 | 1.459491  | 2.348195  |
| H | -6.674834 | 2.520281  | 3.002797  |
| H | -5.161059 | 3.107072  | 2.627902  |
| H | -6.216904 | 2.643073  | 1.358497  |

---

| $E_{\text{elec}}$ (a.u.) | $ZPE$ (a.u.) | $G_{\text{corr}}$ (a.u.) |          |
|--------------------------|--------------|--------------------------|----------|
|                          | -2773.781053 | 0.684392                 | 0.614184 |

---

Cartesian coordinates of pimer **14-1**

|   |           |           |           |
|---|-----------|-----------|-----------|
| O | -6.559385 | -2.708093 | -0.059651 |
| N | -6.305148 | -0.757208 | 1.056975  |
| H | -7.307401 | -0.633801 | 0.989096  |
| C | -0.741221 | 1.714053  | -1.048784 |
| C | -4.361477 | -2.079049 | 0.618122  |
| C | -2.167137 | 1.776144  | -1.154746 |
| C | -0.048556 | 0.5634    | -1.53589  |
| C | -5.787977 | -1.89888  | 0.51425   |
| C | -3.764033 | -3.275355 | 0.196926  |
| H | -4.399729 | -4.094393 | -0.119943 |
| C | -0.805511 | -0.499959 | -2.083491 |
| C | -5.597706 | 0.309809  | 1.621835  |
| C | -0.039512 | 2.80046   | -0.452828 |
| C | -3.556713 | -1.044085 | 1.164968  |
| C | -2.879611 | 0.687952  | -1.726224 |
| C | -2.849372 | 2.919315  | -0.690239 |
| C | 1.389131  | 0.516015  | -1.455423 |
| C | -2.397264 | -3.436938 | 0.248343  |
| C | -2.177766 | -0.436295 | -2.176014 |
| H | -0.312114 | -1.3965   | -2.427198 |
| O | -6.208737 | 1.285852  | 2.026399  |
| C | -4.145844 | 0.139477  | 1.655361  |
| C | -0.771365 | 3.912694  | 0.010667  |
| C | 1.405495  | 2.73692   | -0.340314 |

|   |           |           |           |
|---|-----------|-----------|-----------|
| C | -2.136755 | -1.20467  | 1.219181  |
| C | -4.317954 | 0.748428  | -1.81937  |
| C | -4.302653 | 3.00833   | -0.797502 |
| C | -2.145742 | 3.973814  | -0.111402 |
| C | 2.131802  | -0.581789 | -1.952102 |
| C | 2.095941  | 1.603831  | -0.856811 |
| H | -1.98248  | -4.386658 | -0.05385  |
| C | -1.547488 | -2.409287 | 0.726057  |
| H | -2.728878 | -1.267623 | -2.596522 |
| C | -3.346934 | 1.156745  | 2.178649  |
| H | -0.262574 | 4.752438  | 0.458453  |
| C | 2.146685  | 3.764428  | 0.276626  |
| C | -1.339291 | -0.156759 | 1.760488  |
| O | -5.05081  | -0.15088  | -2.298605 |
| N | -4.91933  | 1.884315  | -1.355246 |
| O | -4.983611 | 3.960745  | -0.452796 |
| H | -2.702523 | 4.834255  | 0.236683  |
| H | 1.625599  | -1.41886  | -2.408248 |
| C | 3.504472  | -0.625014 | -1.85963  |
| C | 3.522798  | 1.548209  | -0.756386 |
| C | -0.116341 | -2.549199 | 0.728507  |
| H | -3.827362 | 2.05978   | 2.533745  |
| C | -1.974025 | 1.010887  | 2.228618  |
| H | 1.646439  | 4.627649  | 0.687782  |
| C | 3.522518  | 3.701352  | 0.375234  |
| C | 0.102936  | -0.317431 | 1.806063  |
| C | 4.224251  | 0.41958   | -1.264511 |
| H | 4.039323  | -1.480029 | -2.253949 |
| C | 4.2174    | 2.608631  | -0.141312 |
| C | 0.524452  | -3.687363 | 0.180444  |
| C | 0.687629  | -1.505198 | 1.280917  |
| H | -1.390681 | 1.828208  | 2.623734  |
| H | 4.08839   | 4.493134  | 0.848605  |
| C | 0.944715  | 0.679513  | 2.338002  |
| C | 5.660442  | 0.367025  | -1.151914 |
| C | 5.673638  | 2.576904  | -0.037284 |
| H | -0.060499 | -4.481569 | -0.257887 |
| C | 1.895188  | -3.81597  | 0.183157  |
| C | 2.110032  | -1.646337 | 1.286623  |
| H | 0.525852  | 1.589018  | 2.740663  |
| C | 2.318398  | 0.539543  | 2.338434  |
| N | 6.276243  | 1.445305  | -0.591302 |
| O | 6.386717  | -0.587229 | -1.537313 |
| O | 6.371033  | 3.446327  | 0.460752  |

|   |           |           |           |
|---|-----------|-----------|-----------|
| C | 2.701996  | -2.813753 | 0.734684  |
| H | 2.372204  | -4.69135  | -0.238115 |
| C | 2.908665  | -0.609548 | 1.811482  |
| H | 2.960069  | 1.321685  | 2.723858  |
| C | 4.132229  | -2.929269 | 0.675912  |
| C | 4.361716  | -0.71172  | 1.766535  |
| N | 4.854281  | -1.905386 | 1.227421  |
| O | 4.74304   | -3.890589 | 0.138108  |
| O | 5.154306  | 0.14048   | 2.143149  |
| H | -5.928923 | 1.925385  | -1.414844 |
| H | 7.281351  | 1.393335  | -0.489706 |
| H | 5.863218  | -1.975633 | 1.206065  |
| N | 6.378929  | -3.192148 | -1.821596 |
| H | 7.34964   | -3.470844 | -1.6989   |
| H | 5.780489  | -3.564015 | -1.019732 |
| H | 6.312953  | -2.12532  | -1.795981 |
| H | 6.03608   | -3.553641 | -2.707945 |
| N | -5.54174  | -2.724037 | -2.518817 |
| H | -5.187395 | -1.723276 | -2.492635 |
| H | -6.225541 | -2.822424 | -3.265659 |
| H | -4.773452 | -3.374536 | -2.659676 |
| H | -6.000821 | -2.890743 | -1.573764 |

---

| $E_{\text{elec}}$ (a.u.) | $ZPE$ (a.u.) | $G_{\text{corr}}$ (a.u.) |         |
|--------------------------|--------------|--------------------------|---------|
|                          | -2773.781721 | 0.684221                 | 0.61353 |

---

Cartesian coordinates of pimer **15**

|   |           |           |           |
|---|-----------|-----------|-----------|
| C | -0.571596 | -1.82562  | 1.060304  |
| C | -1.99818  | -1.845646 | 1.173031  |
| C | 0.149943  | -0.691714 | 1.53945   |
| C | -0.56934  | 0.384768  | 2.104145  |
| C | 0.097389  | -2.926263 | 0.448991  |
| C | -2.668415 | -0.743428 | 1.744682  |
| C | -2.722625 | -2.959589 | 0.674274  |
| C | 1.589144  | -0.664726 | 1.408586  |
| C | -1.944562 | 0.36224   | 2.200269  |
| H | -0.050674 | 1.265495  | 2.451176  |
| C | -0.671554 | -4.016299 | -0.025613 |
| C | 1.535254  | -2.894619 | 0.311006  |
| C | -4.12061  | -0.729022 | 1.820766  |
| C | -4.156959 | -2.954952 | 0.723312  |
| C | -2.043544 | -4.03175  | 0.080946  |

|   |           |           |           |
|---|-----------|-----------|-----------|
| C | 2.357278  | 0.432566  | 1.858359  |
| C | 2.258242  | -1.762982 | 0.792877  |
| H | -2.490592 | 1.202866  | 2.610276  |
| H | -0.186659 | -4.86476  | -0.482867 |
| C | 2.246713  | -3.942634 | -0.310609 |
| O | -4.814342 | 0.177329  | 2.265129  |
| N | -4.748481 | -1.87656  | 1.320243  |
| O | -4.884713 | -3.8641   | 0.237574  |
| H | -2.62001  | -4.870612 | -0.286554 |
| H | 1.877001  | 1.279991  | 2.323399  |
| C | 3.725694  | 0.466886  | 1.699598  |
| C | 3.679161  | -1.719604 | 0.628022  |
| H | 1.725057  | -4.810571 | -0.68319  |
| C | 3.617306  | -3.892468 | -0.465345 |
| C | 4.406892  | -0.587933 | 1.083819  |
| H | 4.283336  | 1.325757  | 2.051286  |
| C | 4.339984  | -2.793002 | -0.0039   |
| H | 4.157363  | -4.696799 | -0.947459 |
| C | 5.836627  | -0.531598 | 0.880961  |
| C | 5.786804  | -2.763456 | -0.189106 |
| N | 6.419353  | -1.619106 | 0.303367  |
| O | 6.575342  | 0.432948  | 1.201198  |
| O | 6.457271  | -3.641922 | -0.709382 |
| H | -5.758427 | -1.864734 | 1.379748  |
| H | 7.417475  | -1.57102  | 0.145875  |
| N | -6.623556 | -3.05621  | -1.557288 |
| H | -7.585666 | -3.330824 | -1.37313  |
| H | -5.968598 | -3.455925 | -0.803737 |
| H | -6.346755 | -3.399452 | -2.473652 |
| H | -6.547496 | -1.999275 | -1.515439 |
| C | 0.571558  | 1.825613  | -1.060408 |
| C | 1.998141  | 1.845582  | -1.173143 |
| C | -0.150028 | 0.691744  | -1.539566 |
| C | 0.569204  | -0.384735 | -2.104334 |
| C | -0.097383 | 2.926282  | -0.449093 |
| C | 2.66833   | 0.743342  | -1.744793 |
| C | 2.722631  | 2.95952   | -0.674432 |
| C | -1.589224 | 0.664788  | -1.40864  |
| C | 1.944429  | -0.362266 | -2.200454 |
| H | 0.050492  | -1.265403 | -2.451445 |
| C | 0.6716    | 4.016322  | 0.025443  |
| C | -1.535243 | 2.894661  | -0.311035 |
| C | 4.120536  | 0.728848  | -1.820832 |
| C | 4.156944  | 2.954829  | -0.723498 |

|   |           |           |           |
|---|-----------|-----------|-----------|
| C | 2.043586  | 4.03173   | -0.081146 |
| C | -2.357404 | -0.432456 | -1.858448 |
| C | -2.258272 | 1.763026  | -0.792848 |
| H | 2.490424  | -1.202879 | -2.61053  |
| H | 0.18674   | 4.864815  | 0.482673  |
| C | -2.246657 | 3.9427    | 0.310592  |
| O | 4.81423   | -0.177445 | -2.265356 |
| N | 4.748442  | 1.876369  | -1.320308 |
| O | 4.884719  | 3.864042  | -0.237859 |
| H | 2.620078  | 4.870596  | 0.286306  |
| H | -1.87717  | -1.279845 | -2.323597 |
| C | -3.725809 | -0.466757 | -1.699602 |
| C | -3.679175 | 1.719638  | -0.627851 |
| H | -1.724983 | 4.810686  | 0.683032  |
| C | -3.61723  | 3.892492  | 0.46552   |
| C | -4.406959 | 0.588008  | -1.083672 |
| H | -4.283482 | -1.32558  | -2.051348 |
| C | -4.339937 | 2.792994  | 0.004198  |
| H | -4.15725  | 4.696823  | 0.947676  |
| C | -5.836654 | 0.531624  | -0.880583 |
| C | -5.786725 | 2.763352  | 0.189717  |
| N | -6.419309 | 1.618999  | -0.302683 |
| O | -6.575422 | -0.432878 | -1.200869 |
| O | -6.457114 | 3.641739  | 0.71022   |
| H | 5.75839   | 1.8645    | -1.379785 |
| H | -7.417386 | 1.570812  | -0.144942 |
| N | 6.623973  | 3.056568  | 1.556492  |
| H | 6.347679  | 3.400236  | 2.472845  |
| H | 6.547805  | 1.999664  | 1.515128  |
| H | 5.968722  | 3.456101  | 0.802981  |
| H | 7.586036  | 3.330962  | 1.371754  |

---

| $E_{\text{elec}}$ (a.u.) | $ZPE$ (a.u.) | $G_{\text{corr}}$ (a.u.) |          |
|--------------------------|--------------|--------------------------|----------|
|                          | -2773.77755  | 0.6841                   | 0.613997 |

---

Cartesian coordinates of pimer **16**

|   |           |           |           |
|---|-----------|-----------|-----------|
| O | -7.694666 | 1.733317  | 0.323292  |
| N | -7.405384 | -0.316187 | -0.601107 |
| H | -8.378452 | -0.506345 | -0.397321 |
| C | 0.535748  | -0.878923 | 1.485781  |
| C | -5.571309 | 1.21465   | -0.620157 |
| C | -0.87169  | -1.110772 | 1.593294  |

|   |           |           |           |
|---|-----------|-----------|-----------|
| C | 1.045359  | 0.434223  | 1.70255   |
| C | -6.938356 | 0.928679  | -0.285562 |
| C | -5.057835 | 2.51545   | -0.489046 |
| H | -5.740992 | 3.327402  | -0.266385 |
| C | 0.145462  | 1.469373  | 2.031012  |
| C | -6.663503 | -1.398149 | -1.092983 |
| C | 1.398716  | -1.967666 | 1.156159  |
| C | -4.720649 | 0.157666  | -1.036768 |
| C | -1.734724 | -0.037055 | 1.926716  |
| C | -1.386744 | -2.405448 | 1.363929  |
| C | 2.466872  | 0.674856  | 1.566588  |
| C | -3.721686 | 2.766312  | -0.694376 |
| C | -1.210815 | 1.238322  | 2.140661  |
| H | 0.505741  | 2.474198  | 2.186988  |
| O | -7.227667 | -2.458949 | -1.314745 |
| C | -5.236681 | -1.136345 | -1.257177 |
| C | 0.833247  | -3.245043 | 0.950051  |
| C | 2.813769  | -1.727462 | 1.018787  |
| C | -3.322664 | 0.407342  | -1.213279 |
| C | -3.162178 | -0.266219 | 2.041523  |
| C | -2.820875 | -2.654436 | 1.454497  |
| C | -0.527037 | -3.457809 | 1.048774  |
| C | 3.030182  | 1.954869  | 1.759233  |
| C | 3.322999  | -0.408287 | 1.212683  |
| H | -3.372747 | 3.784572  | -0.613722 |
| C | -2.81447  | 1.726903  | -1.019322 |
| H | -1.89051  | 2.045497  | 2.380751  |
| C | -4.381669 | -2.180795 | -1.619582 |
| H | 1.46225   | -4.085796 | 0.699947  |
| C | 3.72008   | -2.767422 | 0.69315   |
| C | -2.465689 | -0.67516  | -1.567077 |
| O | -3.984187 | 0.614371  | 2.366752  |
| N | -3.596184 | -1.538131 | 1.786338  |
| O | -3.368702 | -3.732397 | 1.275695  |
| H | -0.954013 | -4.439188 | 0.885547  |
| H | 2.401141  | 2.795351  | 2.009185  |
| C | 4.384055  | 2.178943  | 1.619418  |
| C | 4.721197  | -0.159687 | 1.036169  |
| C | -1.399494 | 1.968011  | -1.155749 |
| H | -4.800876 | -3.168054 | -1.76089  |
| C | -3.027973 | -1.955678 | -1.759361 |
| H | 3.370291  | -3.785335 | 0.611802  |
| C | 5.056491  | -2.517593 | 0.488035  |
| C | -1.044404 | -0.433378 | -1.703223 |

|   |           |           |           |
|---|-----------|-----------|-----------|
| C | 5.238223  | 1.133904  | 1.256724  |
| H | 4.804079  | 3.165811  | 1.761055  |
| C | 5.57106   | -1.217296 | 0.619543  |
| C | -0.834819 | 3.245485  | -0.948051 |
| C | -0.535742 | 0.880012  | -1.485758 |
| H | -2.398239 | -2.795766 | -2.008881 |
| H | 5.738962  | -3.330042 | 0.265074  |
| C | -0.143789 | -1.467659 | -2.032516 |
| C | 6.665335  | 1.394517  | 1.092855  |
| C | 6.938644  | -0.932614 | 0.285524  |
| H | -1.464355 | 4.08549   | -0.696768 |
| C | 0.525377  | 3.459134  | -1.046108 |
| C | 0.871556  | 1.11283   | -1.592839 |
| H | -0.503449 | -2.47255  | -2.189499 |
| C | 1.212282  | -1.235549 | -2.142241 |
| N | 7.406542  | 0.311939  | 0.601474  |
| O | 7.230168  | 2.45501   | 1.314453  |
| O | 7.694422  | -1.737855 | -0.322879 |
| C | 1.385784  | 2.407602  | -1.362132 |
| H | 0.951754  | 4.440559  | -0.881579 |
| C | 1.735317  | 0.040029  | -1.927246 |
| H | 1.892515  | -2.04198  | -2.383272 |
| C | 2.819771  | 2.657531  | -1.452197 |
| C | 3.162545  | 0.270413  | -2.042451 |
| N | 3.595814  | 1.542109  | -1.785478 |
| O | 3.366958  | 3.735544  | -1.271809 |
| O | 3.985079  | -0.60886  | -2.370041 |
| H | -4.592359 | -1.707943 | 1.836711  |
| H | 8.379879  | 0.501243  | 0.398178  |
| H | 4.591844  | 1.712753  | -1.836031 |
| N | 6.157812  | -2.227938 | -2.446477 |
| H | 5.745061  | -3.157764 | -2.461628 |
| H | 5.381728  | -1.531937 | -2.350549 |
| H | 6.829439  | -2.139387 | -1.618023 |
| H | 6.655179  | -2.06465  | -3.319186 |
| N | -6.16239  | 2.227685  | 2.446009  |
| H | -6.661348 | 2.064404  | 3.317793  |
| H | -6.832664 | 2.136589  | 1.6157    |
| H | -5.751372 | 3.158244  | 2.46102   |
| H | -5.384863 | 1.533144  | 2.352176  |

---

| $E_{\text{elec}}$ (a.u.) | $ZPE$ (a.u.) | $G_{\text{corr}}$ (a.u.) |
|--------------------------|--------------|--------------------------|
| -2773.769632             | 0.685365     | 0.615125                 |

---

Cartesian coordinates of pimer **16-1**

|   |           |           |           |
|---|-----------|-----------|-----------|
| O | 7.531523  | -2.075777 | 0.799767  |
| N | 7.448272  | -0.18391  | -0.446609 |
| H | 8.427032  | -0.041359 | -0.231641 |
| C | -0.516432 | 1.325795  | 1.226211  |
| C | 5.491676  | -1.54891  | -0.307917 |
| C | 0.899444  | 1.498225  | 1.329962  |
| C | -1.097683 | 0.076923  | 1.605577  |
| C | 6.866977  | -1.32255  | 0.038412  |
| C | 4.864711  | -2.766209 | 0.004649  |
| H | 5.46836   | -3.581703 | 0.387015  |
| C | -0.25417  | -0.945749 | 2.096411  |
| C | 6.815026  | 0.864148  | -1.125679 |
| C | -1.316393 | 2.39739   | 0.736353  |
| C | 4.745302  | -0.505606 | -0.916301 |
| C | 1.701246  | 0.442286  | 1.835896  |
| C | 1.484619  | 2.715991  | 0.923533  |
| C | -2.516615 | -0.112716 | 1.457821  |
| C | 3.51937   | -2.941361 | -0.220089 |
| C | 1.107135  | -0.764937 | 2.212149  |
| H | -0.665118 | -1.903916 | 2.373966  |
| O | 7.471164  | 1.831299  | -1.480325 |
| C | 5.375147  | 0.69391   | -1.308262 |
| C | -0.685069 | 3.599413  | 0.358734  |
| C | -2.751324 | 2.215588  | 0.617058  |
| C | 3.337578  | -0.666842 | -1.109895 |
| C | 3.13243   | 0.616443  | 1.955719  |
| C | 2.931656  | 2.898447  | 0.999128  |
| C | 0.685815  | 3.753064  | 0.443898  |
| C | -3.1444   | -1.336018 | 1.800956  |
| C | -3.321404 | 0.955062  | 0.954793  |
| H | 3.083017  | -3.901939 | 0.008235  |
| C | 2.713126  | -1.900332 | -0.74618  |
| H | 1.74067   | -1.561912 | 2.57934   |
| C | 4.624063  | 1.733502  | -1.860449 |
| H | -1.26795  | 4.424653  | -0.020766 |
| C | -3.598784 | 3.245454  | 0.161512  |
| C | 2.586106  | 0.415193  | -1.649341 |
| O | 3.903776  | -0.241105 | 2.435764  |
| N | 3.639061  | 1.811661  | 1.521319  |
| O | 3.539788  | 3.902188  | 0.658287  |
| H | 1.165131  | 4.676203  | 0.143842  |
| H | -2.565276 | -2.145954 | 2.216884  |
| C | -4.489932 | -1.532461 | 1.607213  |



|   |           |           |           |
|---|-----------|-----------|-----------|
| C | -4.727241 | 0.754341  | 0.779169  |
| C | 1.292292  | -2.051223 | -0.916874 |
| H | 5.129468  | 2.648979  | -2.137879 |
| C | 3.258841  | 1.59917   | -2.015412 |
| H | -3.193145 | 4.213828  | -0.088153 |
| C | -4.957825 | 3.053091  | 0.021483  |
| C | 1.14829   | 0.275293  | -1.788939 |
| C | -5.296258 | -0.518881 | 1.064396  |
| H | -4.943817 | -2.470705 | 1.90016   |
| C | -5.530208 | 1.815257  | 0.318896  |
| C | 0.618255  | -3.248212 | -0.577624 |
| C | 0.528456  | -0.952558 | -1.418278 |
| H | 2.710599  | 2.436455  | -2.418801 |
| H | -5.602678 | 3.847635  | -0.329959 |
| C | 0.346849  | 1.329889  | -2.265783 |
| C | -6.685806 | -0.74877  | 0.791939  |
| C | -6.965552 | 1.626642  | 0.138043  |
| H | 1.171701  | -4.097777 | -0.20758  |
| C | -0.749435 | -3.369163 | -0.700395 |
| C | -0.890308 | -1.082838 | -1.539809 |
| H | 0.792038  | 2.274716  | -2.535706 |
| C | -1.024177 | 1.200044  | -2.373631 |
| N | -7.422804 | 0.326323  | 0.387376  |
| O | -7.262662 | -1.870343 | 0.884217  |
| O | -7.76322  | 2.482003  | -0.215047 |
| C | -1.519535 | -2.301141 | -1.171028 |
| H | -1.250385 | -4.291264 | -0.435443 |
| C | -1.648999 | 0.006996  | -2.016931 |
| H | -1.638822 | 2.019445  | -2.724148 |
| C | -2.95382  | -2.430364 | -1.275172 |
| C | -3.099445 | -0.102318 | -2.132061 |
| N | -3.629901 | -1.337987 | -1.746256 |
| O | -3.587572 | -3.468662 | -0.972661 |
| O | -3.855187 | 0.770173  | -2.531147 |
| H | 4.642319  | 1.934253  | 1.567958  |
| H | -8.408016 | 0.16835   | 0.218504  |
| H | -4.636787 | -1.398871 | -1.813708 |
| N | -6.084057 | -3.978842 | -0.117019 |
| H | -5.127164 | -3.72645  | -0.49479  |
| H | -5.978826 | -4.718459 | 0.573738  |
| H | -6.55168  | -3.11348  | 0.341991  |
| H | -6.672794 | -4.319984 | -0.873518 |
| N | 5.883067  | -2.021253 | 2.904742  |
| H | 6.360472  | -1.741726 | 3.758958  |

|   |          |           |          |
|---|----------|-----------|----------|
| H | 6.589805 | -2.14988  | 2.114559 |
| H | 5.381488 | -2.891384 | 3.066485 |
| H | 5.182437 | -1.288281 | 2.641591 |

---

| $E_{\text{elec}}$ (a.u.) | $ZPE$ (a.u.) | $G_{\text{corr}}$ (a.u.) |          |
|--------------------------|--------------|--------------------------|----------|
| -2773.773881             |              | 0.684685                 | 0.614556 |

---

Cartesian coordinates of pimer **17**

|   |           |           |           |
|---|-----------|-----------|-----------|
| O | 7.416276  | 1.395796  | 0.824182  |
| N | 7.390924  | -0.756206 | 0.140573  |
| H | 8.375086  | -0.65461  | -0.072213 |
| C | -0.46606  | 1.30012   | -1.205221 |
| C | 5.368178  | 0.173294  | 1.002497  |
| C | 0.956274  | 1.364864  | -1.34563  |
| C | -1.162356 | 2.39117   | -0.608428 |
| C | 6.758872  | 0.329533  | 0.672305  |
| C | 4.671336  | 1.187385  | 1.675546  |
| H | 5.211197  | 2.053574  | 2.036204  |
| C | -0.421908 | 3.513878  | -0.174184 |
| C | 6.823201  | -1.993414 | -0.193715 |
| C | -1.156416 | 0.134723  | -1.655322 |
| C | 4.690254  | -1.020927 | 0.633888  |
| C | 1.655193  | 2.508007  | -0.878781 |
| C | 1.646885  | 0.284016  | -1.936004 |
| C | -2.59743  | 2.309126  | -0.438537 |
| C | 3.321464  | 1.078588  | 1.910481  |
| C | 0.950479  | 3.56867   | -0.3005   |
| H | -0.92551  | 4.353284  | 0.280239  |
| O | 7.536371  | -2.869316 | -0.659714 |
| C | 5.388181  | -2.093043 | 0.044644  |
| C | -0.417397 | -0.917231 | -2.237521 |
| C | -2.585698 | 0.05131   | -1.479553 |
| C | 3.280776  | -1.128869 | 0.855925  |
| C | 3.093431  | 2.565074  | -0.994478 |
| C | 3.094268  | 0.330453  | -2.08217  |
| C | 0.95242   | -0.843894 | -2.375286 |
| C | -3.344268 | 3.354344  | 0.144506  |
| C | -3.280771 | 1.12879   | -0.855807 |
| H | 2.826754  | 1.884519  | 2.429878  |
| C | 2.585695  | -0.051175 | 1.479301  |
| H | 1.50415   | 4.432737  | 0.043249  |
| C | 4.70732   | -3.252584 | -0.330679 |

|   |           |           |           |
|---|-----------|-----------|-----------|
| H | -0.913421 | -1.816989 | -2.566402 |
| C | -3.321514 | -1.078185 | -1.911375 |
| C | 2.597445  | -2.309361 | 0.439085  |
| O | 3.79272   | 3.526699  | -0.593446 |
| N | 3.698     | 1.494325  | -1.592373 |
| O | 3.797325  | -0.53483  | -2.584374 |
| H | 1.517494  | -1.659035 | -2.809307 |
| H | -2.854819 | 4.263028  | 0.459883  |
| C | -4.707226 | 3.251866  | 0.332051  |
| C | -4.690253 | 1.020767  | -0.633805 |
| C | 1.156447  | -0.134646 | 1.655329  |
| H | 5.272467  | -4.058038 | -0.780793 |
| C | 3.344351  | -3.354966 | -0.143181 |
| H | -2.826812 | -1.883814 | -2.431251 |
| C | -4.67141  | -1.187015 | -1.676605 |
| C | 1.162319  | -2.391182 | 0.608622  |
| C | -5.388143 | 2.09259   | -0.043981 |
| H | -5.27231  | 4.057021  | 0.782776  |
| C | -5.368222 | -0.173228 | -1.003052 |
| C | 0.4175    | 0.91726   | 2.237706  |
| C | 0.466057  | -1.300044 | 1.205296  |
| H | 2.854956  | -4.263922 | -0.45786  |
| H | -5.211343 | -2.052938 | -2.0378   |
| C | 0.421791  | -3.513734 | 0.174115  |
| C | -6.82318  | 1.992899  | 0.194298  |
| C | -6.758946 | -0.329562 | -0.67303  |
| H | 0.913578  | 1.816938  | 2.566724  |
| C | -0.952305 | 0.843935  | 2.375571  |
| C | -0.956285 | -1.364701 | 1.345637  |
| H | 0.925339  | -4.353055 | -0.280526 |
| C | -0.950616 | -3.568401 | 0.300286  |
| N | -7.390954 | 0.755915  | -0.14068  |
| O | -7.536321 | 2.868628  | 0.660671  |
| O | -7.416429 | -1.395676 | -0.825608 |
| C | -1.646836 | -0.283862 | 1.936098  |
| H | -1.517329 | 1.659018  | 2.809762  |
| C | -1.65527  | -2.507748 | 0.878653  |
| H | -1.504348 | -4.43234  | -0.043683 |
| C | -3.094208 | -0.33026  | 2.082323  |
| C | -3.09352  | -2.564742 | 0.994348  |
| N | -3.698039 | -1.493924 | 1.592144  |
| O | -3.79714  | 0.534683  | 2.585281  |
| O | -3.792876 | -3.526308 | 0.593308  |
| H | 4.705132  | 1.506258  | -1.678715 |

|   |           |           |           |
|---|-----------|-----------|-----------|
| H | -8.375155 | 0.654277  | 0.071901  |
| H | -4.705109 | -1.506118 | 1.679156  |
| N | -6.347421 | -3.719982 | -0.176174 |
| H | -6.763678 | -2.775579 | -0.483423 |
| H | -5.350029 | -3.595184 | 0.173675  |
| H | -6.923189 | -4.119127 | 0.56185   |
| H | -6.339234 | -4.361426 | -0.966226 |
| N | 6.347587  | 3.720219  | 0.175141  |
| H | 6.9231    | 4.119383  | -0.563064 |
| H | 6.763768  | 2.775668  | 0.482171  |
| H | 6.339772  | 4.361609  | 0.965254  |
| H | 5.349983  | 3.595701  | -0.174281 |

---

| $E_{\text{elec}}$ (a.u.) | $ZPE$ (a.u.) | $G_{\text{corr}}$ (a.u.) |          |
|--------------------------|--------------|--------------------------|----------|
|                          | -2773.780052 | 0.684007                 | 0.614101 |

---

Cartesian coordinates of pimer **18**

|   |           |           |           |
|---|-----------|-----------|-----------|
| O | 4.36626   | -5.427238 | -0.520703 |
| C | 4.294762  | -4.217957 | -0.689414 |
| N | 5.458667  | -3.445574 | -0.611943 |
| C | 3.077013  | -3.461688 | -0.953217 |
| H | 6.307606  | -3.951949 | -0.395227 |
| C | 5.569819  | -2.092088 | -0.757278 |
| C | 1.850687  | -4.1325   | -1.009169 |
| C | 3.134547  | -2.067358 | -1.154529 |
| O | 6.701808  | -1.565243 | -0.573703 |
| C | 4.373912  | -1.373515 | -1.096351 |
| H | 1.843048  | -5.204334 | -0.859352 |
| C | 0.684677  | -3.436086 | -1.2431   |
| C | 1.928705  | -1.339304 | -1.411422 |
| H | 6.879103  | -0.2844   | 0.268071  |
| C | 4.414785  | 0.001366  | -1.377578 |
| H | -0.243012 | -3.986999 | -1.262141 |
| C | 0.686472  | -2.037258 | -1.439755 |
| C | 1.993444  | 0.070199  | -1.62289  |
| N | 7.099354  | 0.546064  | 0.920817  |
| H | 5.371118  | 0.507949  | -1.412363 |
| C | 3.260864  | 0.700433  | -1.639736 |
| C | -0.53756  | -1.29356  | -1.646796 |
| C | 0.772344  | 0.816106  | -1.802267 |
| H | 7.486076  | 0.190773  | 1.792413  |
| H | 6.249676  | 1.126769  | 1.131469  |

|   |           |           |           |
|---|-----------|-----------|-----------|
| H | 7.792643  | 1.146549  | 0.47938   |
| H | 3.340448  | 1.75484   | -1.8565   |
| C | -1.79851  | -1.928572 | -1.671893 |
| C | -0.474941 | 0.121749  | -1.806522 |
| C | 0.771915  | 2.221033  | -1.941883 |
| H | -1.873282 | -2.998009 | -1.550213 |
| C | -2.964332 | -1.209414 | -1.834767 |
| C | -1.686994 | 0.864929  | -1.960633 |
| H | 1.699168  | 2.772869  | -1.919779 |
| C | -0.4023   | 2.931746  | -2.073568 |
| C | -2.929299 | 0.180336  | -1.975532 |
| H | -3.92358  | -1.710766 | -1.849925 |
| C | -1.63167  | 2.270756  | -2.08413  |
| H | -0.394961 | 4.01083   | -2.156152 |
| C | -4.155352 | 0.928461  | -2.12693  |
| C | -2.857947 | 3.046114  | -2.190028 |
| N | -4.032769 | 2.287625  | -2.228752 |
| O | -5.296825 | 0.417831  | -2.177631 |
| O | -2.937045 | 4.266665  | -2.245344 |
| H | -4.883979 | 2.818673  | -2.354776 |
| H | -6.661274 | 0.270852  | -1.288948 |
| N | -7.474174 | 0.107282  | -0.644368 |
| H | -7.908975 | 0.992829  | -0.398628 |
| H | -8.160872 | -0.485915 | -1.104538 |
| H | -7.104719 | -0.395794 | 0.241133  |
| O | -6.586229 | -1.242677 | 1.386875  |
| C | -5.376391 | -1.583291 | 1.504636  |
| C | -4.255271 | -0.684975 | 1.476587  |
| N | -5.102803 | -2.909864 | 1.67407   |
| C | -2.938861 | -1.206324 | 1.598734  |
| C | -4.442629 | 0.699307  | 1.345535  |
| C | -3.847037 | -3.51381  | 1.791514  |
| H | -5.896437 | -3.536867 | 1.707862  |
| C | -1.818391 | -0.315726 | 1.568456  |
| C | -2.721191 | -2.591322 | 1.750259  |
| C | -3.368735 | 1.558076  | 1.309177  |
| H | -5.450324 | 1.093462  | 1.300134  |
| O | -3.776511 | -4.729375 | 1.91135   |
| C | -0.501406 | -0.848728 | 1.696187  |
| C | -2.037812 | 1.084106  | 1.411707  |
| C | -1.421692 | -3.095214 | 1.859155  |
| H | -3.561881 | 2.615595  | 1.211782  |
| C | 0.630611  | 0.049321  | 1.675138  |
| C | -0.338724 | -2.244282 | 1.833055  |

|   |           |           |          |
|---|-----------|-----------|----------|
| C | -0.905677 | 1.980293  | 1.369449 |
| H | -1.290663 | -4.164481 | 1.965181 |
| C | 0.411154  | 1.446331  | 1.501778 |
| C | 1.955497  | -0.422258 | 1.818665 |
| H | 0.647884  | -2.675323 | 1.904514 |
| C | -1.061907 | 3.37213   | 1.194207 |
| C | 1.53503   | 2.330991  | 1.445786 |
| C | 3.03263   | 0.433337  | 1.764093 |
| H | 2.147318  | -1.474506 | 1.961855 |
| C | 0.025597  | 4.2198    | 1.147163 |
| H | -2.043957 | 3.802737  | 1.071083 |
| C | 2.847645  | 1.804983  | 1.564989 |
| C | 1.321391  | 3.715384  | 1.265845 |
| H | 4.037447  | 0.044649  | 1.864934 |
| H | -0.103223 | 5.284625  | 1.002523 |
| C | 3.984077  | 2.688684  | 1.450751 |
| C | 2.454651  | 4.628756  | 1.184855 |
| O | 5.18394   | 2.333164  | 1.490492 |
| N | 3.709646  | 4.018453  | 1.280834 |
| O | 2.389874  | 5.84046   | 1.034246 |
| H | 4.504045  | 4.641761  | 1.216944 |

---

| $E_{\text{elec}}$ (a.u.) | $ZPE$ (a.u.) | $G_{\text{corr}}$ (a.u.) |          |
|--------------------------|--------------|--------------------------|----------|
|                          | -2773.779723 | 0.684096                 | 0.613034 |

---

Cartesian coordinates of pimer **19**

|   |           |           |          |
|---|-----------|-----------|----------|
| C | 0.718432  | 0.807744  | 1.608154 |
| C | 2.113647  | 0.534025  | 1.779211 |
| C | -0.231011 | -0.194165 | 1.951944 |
| C | 0.22374   | -1.416565 | 2.492777 |
| C | 0.306363  | 2.076985  | 1.100062 |
| C | 2.515786  | -0.703716 | 2.305122 |
| C | 3.079553  | 1.527083  | 1.419174 |
| C | -1.641557 | 0.060387  | 1.726488 |
| C | 1.56429   | -1.666317 | 2.669208 |
| H | -0.481148 | -2.184708 | 2.771149 |
| C | 1.29951   | 3.054982  | 0.822946 |
| C | -1.09434  | 2.337079  | 0.886643 |
| C | 3.928273  | -1.011661 | 2.480502 |
| C | 4.439791  | 1.20719   | 1.553628 |
| C | 2.634444  | 2.794203  | 0.97165  |
| C | -2.623498 | -0.905948 | 2.008553 |

|   |           |           |           |
|---|-----------|-----------|-----------|
| C | -2.046426 | 1.314871  | 1.187345  |
| H | 1.915649  | -2.603481 | 3.080659  |
| H | 1.007979  | 4.039644  | 0.490905  |
| C | -1.562269 | 3.561583  | 0.366113  |
| O | 4.389184  | -2.046574 | 2.936548  |
| N | 4.79514   | 0.00401   | 2.059866  |
| O | 5.459394  | 1.97592   | 1.260413  |
| H | 3.35679   | 3.5715    | 0.76558   |
| H | -2.346062 | -1.864553 | 2.418535  |
| C | -3.961935 | -0.677656 | 1.734914  |
| C | -3.43064  | 1.551151  | 0.928253  |
| H | -0.869353 | 4.35571   | 0.133468  |
| C | -2.907932 | 3.783556  | 0.12804   |
| C | -4.377186 | 0.530593  | 1.187475  |
| H | -4.70062  | -1.442333 | 1.940703  |
| C | -3.84506  | 2.791496  | 0.395531  |
| H | -3.256224 | 4.726043  | -0.27439  |
| C | -5.786255 | 0.733796  | 0.843662  |
| C | -5.263497 | 3.042657  | 0.117506  |
| N | -6.127091 | 1.989038  | 0.414591  |
| O | -6.648618 | -0.149459 | 0.922429  |
| O | -5.709497 | 4.085247  | -0.33141  |
| H | 5.784576  | -0.20054  | 2.138148  |
| H | -7.090735 | 2.124365  | 0.137147  |
| N | 5.580795  | 3.768288  | -0.599504 |
| H | 4.835913  | 4.363906  | -0.942677 |
| H | 5.329658  | 2.743511  | 0.556013  |
| H | 5.877629  | 3.151559  | -1.36002  |
| H | 6.366159  | 4.36307   | -0.355882 |
| C | -0.675505 | -1.206355 | -1.385057 |
| C | -2.101096 | -1.325103 | -1.413763 |
| C | -0.072235 | -0.005551 | -1.85216  |
| C | -0.89759  | 1.049128  | -2.299617 |
| C | 0.108838  | -2.281876 | -0.869042 |
| C | -2.877966 | -0.249842 | -1.876642 |
| C | -2.718031 | -2.520811 | -0.937652 |
| C | 1.37428   | 0.10795   | -1.847938 |
| C | -2.268306 | 0.935119  | -2.311902 |
| H | -0.461515 | 1.982247  | -2.622447 |
| C | -0.553358 | -3.454677 | -0.413631 |
| C | 1.542547  | -2.147923 | -0.810132 |
| C | -4.328306 | -0.325587 | -1.846911 |
| C | -4.116168 | -2.578756 | -0.896867 |
| C | -1.917112 | -3.576559 | -0.441608 |

|   |           |           |           |
|---|-----------|-----------|-----------|
| C | 2.031471  | 1.237454  | -2.367684 |
| C | 2.153856  | -0.957631 | -1.313845 |
| H | -2.89907  | 1.751716  | -2.638061 |
| H | 0.023072  | -4.28434  | -0.03399  |
| C | 2.369019  | -3.151055 | -0.26439  |
| O | -5.108284 | 0.559047  | -2.176682 |
| N | -4.842842 | -1.539503 | -1.373222 |
| O | -4.749142 | -3.616462 | -0.402152 |
| H | -2.398826 | -4.476897 | -0.084762 |
| H | 1.464087  | 2.043913  | -2.805994 |
| C | 3.412153  | 1.341659  | -2.352133 |
| C | 3.576206  | -0.834603 | -1.280854 |
| H | 1.936031  | -4.048729 | 0.149236  |
| C | 3.746594  | -3.017711 | -0.222072 |
| C | 4.190675  | 0.329434  | -1.80336  |
| H | 3.904464  | 2.204952  | -2.781493 |
| C | 4.358182  | -1.87787  | -0.732509 |
| H | 4.369402  | -3.785598 | 0.217449  |
| C | 5.647904  | 0.465103  | -1.783107 |
| C | 5.819047  | -1.763845 | -0.691795 |
| N | 6.340638  | -0.588218 | -1.234168 |
| O | 6.258618  | 1.447142  | -2.212219 |
| O | 6.575985  | -2.600322 | -0.227324 |
| H | -5.851776 | -1.553138 | -1.291591 |
| H | 7.349438  | -0.505946 | -1.221722 |
| N | -7.159691 | -2.996302 | 0.432556  |
| H | -7.113496 | -2.038624 | 0.789033  |
| H | -7.946368 | -3.055014 | -0.205802 |
| H | -5.737145 | -3.403353 | -0.141157 |
| H | -7.362193 | -3.61304  | 1.212914  |

---

| $E_{\text{elec}}$ (a.u.) | $ZPE$ (a.u.) | $G_{\text{corr}}$ (a.u.) |          |
|--------------------------|--------------|--------------------------|----------|
|                          | -2773.75278  | 0.6828                   | 0.612269 |

---

Cartesian coordinates of pimer **20**

|   |           |           |           |
|---|-----------|-----------|-----------|
| O | -6.818624 | -2.50751  | -0.241011 |
| N | -6.452814 | -0.653904 | 1.007155  |
| H | -7.436322 | -0.434086 | 0.91223   |
| C | -0.493077 | 1.864856  | -1.039351 |
| C | -4.590823 | -2.088261 | 0.482958  |
| C | -1.906296 | 2.091044  | -0.987316 |
| C | 0.006671  | 0.643362  | -1.584597 |



|   |           |           |           |
|---|-----------|-----------|-----------|
| C | -6.023714 | -1.801835 | 0.380381  |
| C | -4.091177 | -3.281226 | -0.028036 |
| H | -4.786688 | -4.004377 | -0.436347 |
| C | -0.922599 | -0.321825 | -2.055459 |
| C | -5.656854 | 0.357257  | 1.536742  |
| C | 0.386848  | 2.857555  | -0.523075 |
| C | -3.715413 | -1.141675 | 1.062427  |
| C | -2.803706 | 1.085959  | -1.470162 |
| C | -2.394013 | 3.288605  | -0.4398   |
| C | 1.428107  | 0.407858  | -1.618133 |
| C | -2.731569 | -3.542606 | 0.00265   |
| C | -2.274895 | -0.114883 | -1.998132 |
| H | -0.570661 | -1.263031 | -2.449383 |
| O | -6.16823  | 1.407834  | 1.895613  |
| C | -4.220245 | 0.06824   | 1.593705  |
| C | -0.155032 | 4.046787  | 0.011402  |
| C | 1.816363  | 2.614632  | -0.536301 |
| C | -2.310596 | -1.396612 | 1.081615  |
| C | -4.185037 | 1.322045  | -1.349069 |
| C | -3.827002 | 3.528432  | -0.334713 |
| C | -1.513494 | 4.260064  | 0.051779  |
| C | 1.983321  | -0.777926 | -2.142147 |
| C | 2.310601  | 1.396653  | -1.081591 |
| H | -2.386494 | -4.485199 | -0.393266 |
| C | -1.816392 | -2.614599 | 0.536315  |
| H | -2.943342 | -0.891399 | -2.342753 |
| C | -3.349036 | 1.010199  | 2.131187  |
| H | 0.493583  | 4.817657  | 0.397964  |
| C | 2.731528  | 3.542754  | -0.002816 |
| C | -1.428069 | -0.407863 | 1.618197  |
| O | -5.162382 | 0.520191  | -1.692704 |
| N | -4.621671 | 2.483683  | -0.816974 |
| O | -4.356217 | 4.526701  | 0.12659   |
| H | -1.931079 | 5.169549  | 0.463263  |
| H | 1.344715  | -1.545045 | -2.553175 |
| C | 3.34912   | -1.010138 | -2.131135 |
| C | 3.715433  | 1.141788  | -1.062461 |
| C | -0.386894 | -2.857632 | 0.523218  |
| H | -3.760188 | 1.931546  | 2.525271  |
| C | -1.983241 | 0.77794   | 2.1422    |
| H | 2.386439  | 4.485411  | 0.392936  |
| C | 4.09115   | 3.281444  | 0.027824  |
| C | -0.006638 | -0.643417 | 1.584668  |
| C | 4.220304  | -0.068129 | -1.593691 |

|   |           |           |           |
|---|-----------|-----------|-----------|
| H | 3.760304  | -1.931475 | -2.525207 |
| C | 4.59082   | 2.088456  | -0.483094 |
| C | 0.154932  | -4.046991 | -0.01103  |
| C | 0.493069  | -1.864919 | 1.039402  |
| H | -1.344612 | 1.545062  | 2.553185  |
| H | 4.786658  | 4.004649  | 0.436042  |
| C | 0.922665  | 0.321702  | 2.055611  |
| C | 5.656918  | -0.357105 | -1.536703 |
| C | 6.023716  | 1.802083  | -0.380506 |
| H | -0.493722 | -4.817966 | -0.397318 |
| C | 1.513388  | -4.2603   | -0.051441 |
| C | 1.906282  | -2.091134 | 0.987318  |
| H | 0.570751  | 1.262823  | 2.449758  |
| C | 2.274957  | 0.114758  | 1.998189  |
| N | 6.452837  | 0.654057  | -1.007084 |
| O | 6.168327  | -1.407669 | -1.895589 |
| O | 6.818597  | 2.507866  | 0.240802  |
| C | 2.393953  | -3.288755 | 0.439887  |
| H | 1.930933  | -5.169887 | -0.462741 |
| C | 2.803728  | -1.086034 | 1.470062  |
| H | 2.943434  | 0.891203  | 2.342921  |
| C | 3.82693   | -3.528634 | 0.334801  |
| C | 4.185044  | -1.322134 | 1.348872  |
| N | 4.621636  | -2.48377  | 0.816751  |
| O | 4.356116  | -4.527026 | -0.126275 |
| O | 5.162423  | -0.520265 | 1.692394  |
| H | -5.620414 | 2.59661   | -0.683626 |
| H | 7.436363  | 0.434305  | -0.912204 |
| H | 5.620372  | -2.596723 | 0.683369  |
| N | 5.289248  | 1.83795   | 2.78739   |
| H | 4.54128   | 2.518193  | 2.866388  |
| H | 4.982867  | 0.402289  | 2.136769  |
| H | 5.992315  | 2.235238  | 2.161427  |
| H | 5.710039  | 1.73112   | 3.704652  |
| N | -5.289268 | -1.837967 | -2.787584 |
| H | -4.982821 | -0.402335 | -2.137242 |
| H | -5.710771 | -1.730996 | -3.704504 |
| H | -4.541217 | -2.518032 | -2.867298 |
| H | -5.9918   | -2.235467 | -2.16116  |

---

| $E_{\text{elec}}$ (a.u.) | $ZPE$ (a.u.) | $G_{\text{corr}}$ (a.u.) |          |
|--------------------------|--------------|--------------------------|----------|
|                          | -2773.745488 | 0.682296                 | 0.611223 |

---

Cartesian coordinates of pimer **21**

|   |           |           |           |
|---|-----------|-----------|-----------|
| C | -0.650239 | -1.857328 | 0.980807  |
| C | -2.079828 | -1.845981 | 1.041251  |
| C | 0.075641  | -0.761055 | 1.52633   |
| C | -0.636527 | 0.305182  | 2.119393  |
| C | 0.015691  | -2.95117  | 0.349489  |
| C | -2.743749 | -0.75784  | 1.633694  |
| C | -2.815571 | -2.921904 | 0.459819  |
| C | 1.524093  | -0.752247 | 1.42803   |
| C | -2.0119   | 0.312227  | 2.169759  |
| H | -0.10766  | 1.152399  | 2.528973  |
| C | -0.764222 | -4.002181 | -0.208841 |
| C | 1.453142  | -2.95385  | 0.268484  |
| C | -4.195725 | -0.699211 | 1.638179  |
| C | -4.213353 | -2.854664 | 0.461787  |
| C | -2.131253 | -3.992707 | -0.162802 |
| C | 2.297171  | 0.317085  | 1.915864  |
| C | 2.185005  | -1.846238 | 0.798249  |
| H | -2.55434  | 1.143547  | 2.602073  |
| H | -0.27883  | -4.835098 | -0.693193 |
| C | 2.166684  | -4.005997 | -0.341425 |
| O | -4.889675 | 0.210417  | 2.076656  |
| N | -4.8292   | -1.807025 | 1.057872  |
| O | -4.943294 | -3.787539 | -0.100707 |
| H | -2.705955 | -4.796886 | -0.601661 |
| H | 1.824245  | 1.160469  | 2.395833  |
| C | 3.675451  | 0.341396  | 1.768627  |
| C | 3.605816  | -1.822764 | 0.664095  |
| H | 1.643723  | -4.862954 | -0.736566 |
| C | 3.546109  | -3.978562 | -0.454764 |
| C | 4.336279  | -0.707088 | 1.139712  |
| H | 4.253008  | 1.182833  | 2.130857  |
| C | 4.270492  | -2.897902 | 0.032996  |
| H | 4.084258  | -4.789052 | -0.928649 |
| C | 5.780732  | -0.633108 | 0.91446   |
| C | 5.727216  | -2.881583 | -0.123242 |
| N | 6.366743  | -1.7467   | 0.374127  |
| O | 6.46851   | 0.36146   | 1.177277  |
| O | 6.386159  | -3.771134 | -0.635436 |
| H | -5.835152 | -1.716937 | 0.991768  |
| H | 7.362284  | -1.697778 | 0.20159   |
| N | -7.403742 | -3.075234 | -0.656107 |
| H | -8.133494 | -3.115154 | 0.047208  |
| H | -5.941241 | -3.520293 | -0.24556  |

|   |           |           |           |
|---|-----------|-----------|-----------|
| H | -7.695514 | -3.664402 | -1.429153 |
| H | -7.334334 | -2.116018 | -0.998417 |
| C | 0.650456  | 1.858069  | -0.981013 |
| C | 2.080077  | 1.847219  | -1.040698 |
| C | -0.074742 | 0.761559  | -1.526969 |
| C | 0.638084  | -0.304116 | -2.120236 |
| C | -0.016198 | 2.951654  | -0.350016 |
| C | 2.744684  | 0.759464  | -1.633084 |
| C | 2.81514   | 2.923228  | -0.458565 |
| C | -1.5232   | 0.751922  | -1.428847 |
| C | 2.013485  | -0.310611 | -2.170011 |
| H | 0.109726  | -1.151311 | -2.530517 |
| C | 0.763052  | 4.002755  | 0.209063  |
| C | -1.453709 | 2.953944  | -0.269994 |
| C | 4.196675  | 0.70126   | -1.636662 |
| C | 4.212946  | 2.856419  | -0.459626 |
| C | 2.130115  | 3.99367   | 0.163909  |
| C | -2.295543 | -0.31812  | -1.91626  |
| C | -2.184848 | 1.845785  | -0.799604 |
| H | 2.556424  | -1.141526 | -2.602475 |
| H | 0.277106  | 4.835334  | 0.693442  |
| C | -2.168005 | 4.00619   | 0.338862  |
| O | 4.891154  | -0.208004 | -2.075078 |
| N | 4.829464  | 1.809015  | -1.055509 |
| O | 4.942249  | 3.789413  | 0.10348   |
| H | 2.704324  | 4.797859  | 0.603394  |
| H | -1.822032 | -1.16153  | -2.395607 |
| C | -3.673826 | -0.343217 | -1.769173 |
| C | -3.605678 | 1.821635  | -0.665845 |
| H | -1.645618 | 4.863727  | 0.733504  |
| C | -3.547465 | 3.978169  | 0.451656  |
| C | -4.335367 | 0.705237  | -1.140965 |
| H | -4.250831 | -1.185235 | -2.130928 |
| C | -4.271124 | 2.896794  | -0.035601 |
| H | -4.0862   | 4.788726  | 0.924761  |
| C | -5.779794 | 0.630466  | -0.915891 |
| C | -5.727877 | 2.879733  | 0.120261  |
| N | -6.366623 | 1.744139  | -0.37656  |
| O | -6.466722 | -0.364924 | -1.177809 |
| O | -6.387508 | 3.769239  | 0.631639  |
| H | 5.835439  | 1.719308  | -0.989227 |
| H | -7.362177 | 1.694789  | -0.204232 |
| N | 7.400174  | 3.075452  | 0.665306  |
| H | 7.688375  | 3.660568  | 1.442754  |

|   |          |          |           |
|---|----------|----------|-----------|
| H | 7.330355 | 2.114301 | 1.00214   |
| H | 5.939917 | 3.521637 | 0.25094   |
| H | 8.132546 | 3.120016 | -0.035002 |

---

| $E_{\text{elec}}$ (a.u.) | $ZPE$ (a.u.) | $G_{\text{corr}}$ (a.u.) |        |
|--------------------------|--------------|--------------------------|--------|
|                          | -2773.749567 | 0.682766                 | 0.6117 |

---

Cartesian coordinates of pimer **22**

|   |           |           |           |
|---|-----------|-----------|-----------|
| O | 7.788604  | 2.014555  | -0.549034 |
| N | 7.52438   | 0.072489  | 0.581049  |
| H | 8.520523  | -0.084054 | 0.488622  |
| C | -0.604376 | -1.18708  | -1.260265 |
| C | 5.619191  | 1.524567  | 0.308772  |
| C | 0.810626  | -1.387458 | -1.331005 |
| C | -1.159063 | 0.049776  | -1.708374 |
| C | 7.042564  | 1.270292  | 0.081435  |
| C | 5.064508  | 2.72864   | -0.108428 |
| H | 5.71272   | 3.470855  | -0.55612  |
| C | -0.290872 | 1.04437   | -2.233157 |
| C | 6.802658  | -0.944789 | 1.204891  |
| C | -1.424647 | -2.222456 | -0.731712 |
| C | 4.805363  | 0.529083  | 0.898731  |
| C | 1.640946  | -0.349253 | -1.848044 |
| C | 1.366772  | -2.598465 | -0.88388  |
| C | -2.579798 | 0.266779  | -1.602418 |
| C | 3.708906  | 2.965432  | 0.045557  |
| C | 1.063466  | 0.860056  | -2.300192 |
| H | -0.691925 | 1.985495  | -2.575325 |
| O | 7.377847  | -1.95617  | 1.57512   |
| C | 5.362985  | -0.699582 | 1.331299  |
| C | -0.821802 | -3.431614 | -0.319265 |
| C | -2.852866 | -2.000427 | -0.606983 |
| C | 3.40342   | 0.760261  | 1.042375  |
| C | 3.027041  | -0.555373 | -1.879049 |
| C | 2.80525   | -2.808048 | -0.921114 |
| C | 0.539935  | -3.617079 | -0.388466 |
| C | -3.18529  | 1.473258  | -2.010479 |
| C | -3.403364 | -0.759935 | -1.042267 |
| H | 3.317946  | 3.912954  | -0.291426 |
| C | 2.852684  | 2.000541  | 0.606804  |
| H | 1.708732  | 1.638485  | -2.684603 |
| C | 4.548178  | -1.682417 | 1.883975  |

|   |           |           |           |
|---|-----------|-----------|-----------|
| H | -1.42737  | -4.237964 | 0.065364  |
| C | -3.70934  | -2.965442 | -0.046356 |
| C | 2.580084  | -0.266386 | 1.603006  |
| O | 3.834344  | 0.367731  | -2.340753 |
| N | 3.540035  | -1.725474 | -1.434988 |
| O | 3.405345  | -3.808225 | -0.556276 |
| H | 0.999431  | -4.542632 | -0.066712 |
| H | -2.588752 | 2.273439  | -2.420319 |
| C | -4.547598 | 1.683276  | -1.883025 |
| C | -4.805308 | -0.528641 | -0.898824 |
| C | 1.424471  | 2.222476  | 0.731845  |
| H | 4.997329  | -2.617468 | 2.191582  |
| C | 3.185858  | -1.472536 | 2.011603  |
| H | -3.31857  | -3.91314  | 0.290357  |
| C | -5.064981 | -2.728609 | 0.107271  |
| C | 1.159296  | -0.049664 | 1.708833  |
| C | -5.362665 | 0.700276  | -1.331015 |
| H | -4.996567 | 2.618519  | -2.190317 |
| C | -5.619411 | -1.52428  | -0.309504 |
| C | 0.821439  | 3.431562  | 0.319454  |
| C | 0.604394  | 1.187059  | 1.260613  |
| H | 2.589558  | -2.272534 | 2.422145  |
| H | -5.713386 | -3.47097  | 0.554444  |
| C | 0.291259  | -1.044429 | 2.233555  |
| C | -6.80239  | 0.945474  | -1.205201 |
| C | -7.042915 | -1.270086 | -0.082765 |
| H | 1.426857  | 4.237964  | -0.065293 |
| C | -0.540302 | 3.616908  | 0.388901  |
| C | -0.810632 | 1.387248  | 1.331443  |
| H | 0.692452  | -1.985543 | 2.575591  |
| C | -1.063109 | -0.860338 | 2.300577  |
| N | -7.524454 | -0.072036 | -0.582102 |
| O | -7.377369 | 1.957024  | -1.575289 |
| O | -7.789312 | -2.014694 | 0.546828  |
| C | -1.366966 | 2.598196  | 0.884404  |
| H | -0.99994  | 4.542427  | 0.06725   |
| C | -1.640783 | 0.348912  | 1.848504  |
| H | -1.708259 | -1.638917 | 2.684882  |
| C | -2.805465 | 2.807634  | 0.921841  |
| C | -3.026907 | 0.55476   | 1.879375  |
| N | -3.540081 | 1.72485   | 1.435477  |
| O | -3.405685 | 3.807879  | 0.557389  |
| O | -3.834099 | -0.368446 | 2.34114   |
| H | 4.543079  | -1.857745 | -1.407742 |

|   |           |           |           |
|---|-----------|-----------|-----------|
| H | -8.520679 | 0.084392  | -0.490347 |
| H | -4.54314  | 1.85706   | 1.408528  |
| N | -6.451954 | 0.142534  | 2.570388  |
| H | -6.897417 | -0.762557 | 2.426847  |
| H | -4.826979 | -0.116915 | 2.353296  |
| H | -6.953302 | 0.799113  | 1.979072  |
| H | -6.620981 | 0.41497   | 3.533668  |
| N | 6.452004  | -0.143559 | -2.571292 |
| H | 6.952996  | -0.801825 | -1.981558 |
| H | 6.898024  | 0.760911  | -2.42552  |
| H | 6.620891  | -0.413878 | -3.535198 |
| H | 4.827182  | 0.115993  | -2.353536 |

---

| $E_{\text{elec}}$ (a.u.) | $ZPE$ (a.u.) | $G_{\text{corr}}$ (a.u.) |          |
|--------------------------|--------------|--------------------------|----------|
|                          | -2773.742575 | 0.682441                 | 0.610692 |

---

Cartesian coordinates of pimer **23**

|   |           |           |           |
|---|-----------|-----------|-----------|
| O | 7.456541  | 1.410601  | 0.984445  |
| N | 7.494852  | -0.713778 | 0.211251  |
| H | 8.486529  | -0.603094 | 0.041715  |
| C | -0.543672 | 1.378137  | -1.109478 |
| C | 5.418439  | 0.173639  | 1.03971   |
| C | 0.878748  | 1.47667   | -1.22912  |
| C | -1.267037 | 2.422678  | -0.458932 |
| C | 6.842581  | 0.360217  | 0.76523   |
| C | 4.70361   | 1.166811  | 1.704064  |
| H | 5.227197  | 2.048245  | 2.05173   |
| C | -0.549692 | 3.533132  | 0.0631    |
| C | 6.940021  | -1.928683 | -0.19772  |
| C | -1.203879 | 0.230517  | -1.631812 |
| C | 4.765691  | -1.008995 | 0.614952  |
| C | 1.551866  | 2.607896  | -0.680178 |
| C | 1.597127  | 0.453129  | -1.872113 |
| C | -2.697108 | 2.316278  | -0.324353 |
| C | 3.343249  | 1.028622  | 1.918358  |
| C | 0.812362  | 3.626365  | -0.03551  |
| H | -1.078276 | 4.328112  | 0.565874  |
| O | 7.65842   | -2.785607 | -0.685407 |
| C | 5.49378   | -2.050522 | -0.002542 |
| C | -0.440256 | -0.766525 | -2.278493 |
| C | -2.63853  | 0.103487  | -1.463043 |
| C | 3.357305  | -1.143839 | 0.806878  |

|   |           |           |           |
|---|-----------|-----------|-----------|
| C | 2.949394  | 2.67207   | -0.781805 |
| C | 3.045157  | 0.529366  | -1.986382 |
| C | 0.926479  | -0.661008 | -2.396643 |
| C | -3.471053 | 3.324829  | 0.283677  |
| C | -3.3573   | 1.143815  | -0.806843 |
| H | 2.825988  | 1.825884  | 2.429842  |
| C | 2.638534  | -0.103488 | 1.463041  |
| H | 1.339522  | 4.477267  | 0.374461  |
| C | 4.840564  | -3.197361 | -0.436662 |
| H | -0.919973 | -1.645142 | -2.681343 |
| C | -3.343258 | -1.028579 | -1.918453 |
| C | 2.697122  | -2.316342 | 0.324472  |
| O | 3.619821  | 3.676754  | -0.280998 |
| N | 3.615982  | 1.680894  | -1.417829 |
| O | 3.780655  | -0.291411 | -2.51503  |
| H | 1.510921  | -1.433025 | -2.880406 |
| H | -3.004189 | 4.228725  | 0.642853  |
| C | -4.840548 | 3.197273  | 0.436815  |
| C | -4.765695 | 1.008985  | -0.614958 |
| C | 1.203891  | -0.230538 | 1.631859  |
| H | 5.425146  | -3.97921  | -0.903338 |
| C | 3.471074  | -3.32493  | -0.283485 |
| H | -2.826    | -1.825821 | -2.429972 |
| C | -4.703627 | -1.166752 | -1.704209 |
| C | 1.26705   | -2.422732 | 0.459038  |
| C | -5.493778 | 2.050484  | 0.002586  |
| H | -5.425126 | 3.979096  | 0.903542  |
| C | -5.418455 | -0.173612 | -1.039802 |
| C | 0.440273  | 0.766508  | 2.278539  |
| C | 0.543686  | -1.378175 | 1.109561  |
| H | 3.004221  | -4.228867 | -0.642573 |
| H | -5.227222 | -2.048151 | -2.05195  |
| C | 0.549703  | -3.533183 | -0.062996 |
| C | -6.940033 | 1.928672  | 0.197697  |
| C | -6.84261  | -0.360174 | -0.765383 |
| H | 0.919992  | 1.645129  | 2.681377  |
| C | -0.926461 | 0.660991  | 2.396696  |
| C | -0.878734 | -1.476703 | 1.229201  |
| H | 1.078285  | -4.32816  | -0.565777 |
| C | -0.812353 | -3.626401 | 0.035592  |
| N | -7.494875 | 0.713801  | -0.211351 |
| O | -7.658425 | 2.785585  | 0.685414  |
| O | -7.456592 | -1.410524 | -0.984695 |
| C | -1.597111 | -0.453149 | 1.872176  |



|   |           |           |           |
|---|-----------|-----------|-----------|
| H | -1.510903 | 1.433015  | 2.880449  |
| C | -1.551855 | -2.607923 | 0.68025   |
| H | -1.339517 | -4.477292 | -0.374396 |
| C | -3.045141 | -0.529374 | 1.986434  |
| C | -2.949387 | -2.672057 | 0.781814  |
| N | -3.615974 | -1.680863 | 1.417809  |
| O | -3.780646 | 0.291452  | 2.514995  |
| O | -3.619827 | -3.676704 | 0.280939  |
| H | 4.627182  | 1.699209  | -1.450773 |
| H | -8.486564 | 0.603133  | -0.041879 |
| H | -4.627177 | -1.699144 | 1.450698  |
| N | -6.228874 | -3.703078 | 0.41255   |
| H | -6.701165 | -2.974341 | -0.131987 |
| H | -4.663463 | -3.620266 | 0.37463   |
| H | -6.648367 | -3.715107 | 1.337001  |
| H | -6.455301 | -4.593599 | -0.020781 |
| N | 6.228843  | 3.703207  | -0.412697 |
| H | 6.648346  | 3.715278  | -1.337142 |
| H | 6.701111  | 2.974428  | 0.131802  |
| H | 6.455287  | 4.593697  | 0.020691  |
| H | 4.66347   | 3.620406  | -0.374756 |

---

| $E_{\text{elec}}$ (a.u.) | $ZPE$ (a.u.) | $G_{\text{corr}}$ (a.u.) |          |
|--------------------------|--------------|--------------------------|----------|
|                          | -2773.750635 | 0.682796                 | 0.612414 |

---

Cartesian coordinates of NH<sub>4</sub>PDI tetramers in LS and HS state

LS state

|   |           |           |           |
|---|-----------|-----------|-----------|
| C | 2.681768  | -0.104257 | -0.152554 |
| C | 3.821717  | 0.756025  | -0.093688 |
| C | 2.16684   | -0.488667 | -1.422823 |
| C | 2.816676  | -0.039175 | -2.588867 |
| C | 2.074568  | -0.545093 | 1.062004  |
| C | 4.431498  | 1.18062   | -1.288872 |
| C | 4.315392  | 1.188668  | 1.166384  |
| C | 0.978171  | -1.316971 | -1.482945 |
| C | 3.932511  | 0.77133   | -2.523663 |
| H | 2.449905  | -0.330463 | -3.560548 |
| C | 2.595766  | -0.076787 | 2.291604  |
| C | 0.929209  | -1.413119 | 1.002527  |
| C | 5.613355  | 2.037522  | -1.255633 |
| C | 5.463519  | 2.060741  | 1.225339  |
| C | 3.677359  | 0.771001  | 2.338547  |
| C | 0.382326  | -1.673661 | -2.709795 |
| C | 0.393246  | -1.778154 | -0.270541 |
| H | 4.42809   | 1.127446  | -3.416659 |
| H | 2.125186  | -0.359993 | 3.220449  |
| C | 0.296212  | -1.89656  | 2.172826  |
| O | 6.251392  | 2.410755  | -2.220639 |
| N | 6.009682  | 2.434892  | 0.03263   |
| O | 5.990576  | 2.496917  | 2.278184  |
| H | 4.020135  | 1.163189  | 3.287412  |
| H | 0.803858  | -1.324024 | -3.639116 |
| C | -0.749758 | -2.46101  | -2.758177 |
| C | -0.768641 | -2.608283 | -0.330243 |
| H | 0.676683  | -1.622725 | 3.145001  |
| C | -0.824867 | -2.688935 | 2.107587  |
| C | -1.326617 | -2.936095 | -1.579491 |
| H | -1.20545  | -2.741581 | -3.69803  |
| C | -1.362092 | -3.077394 | 0.872891  |
| H | -1.339324 | -2.984551 | 3.013771  |
| C | -2.543548 | -3.738955 | -1.66091  |
| C | -2.542171 | -3.896392 | 0.817639  |
| N | -3.05385  | -4.153944 | -0.418952 |
| O | -3.118356 | -4.063405 | -2.683286 |
| O | -3.110164 | -4.400618 | 1.826555  |
| H | 6.841689  | 3.008449  | 0.073557  |
| H | -3.892414 | -4.717844 | -0.458089 |
| N | 6.662967  | 1.156451  | 4.37149   |

|   |           |           |           |
|---|-----------|-----------|-----------|
| H | 6.000682  | 0.459739  | 4.699861  |
| H | 6.249442  | 1.709319  | 3.527256  |
| H | 7.544767  | 0.677592  | 3.990302  |
| H | 6.903845  | 1.793891  | 5.125862  |
| C | 3.446154  | -3.703933 | -0.47583  |
| C | 2.300288  | -4.5151   | -0.748367 |
| C | 3.864775  | -3.516283 | 0.876851  |
| C | 3.152344  | -4.178317 | 1.90508   |
| C | 4.145467  | -3.10116  | -1.559811 |
| C | 1.608033  | -5.144945 | 0.319776  |
| C | 1.87087   | -4.683794 | -2.077741 |
| C | 5.001865  | -2.678514 | 1.151186  |
| C | 2.064283  | -4.97358  | 1.630693  |
| H | 3.461344  | -4.071039 | 2.933393  |
| C | 3.680726  | -3.310393 | -2.872534 |
| C | 5.30696   | -2.276808 | -1.284808 |
| C | 0.453483  | -5.964544 | 0.042007  |
| C | 0.681549  | -5.473432 | -2.381307 |
| C | 2.561863  | -4.077863 | -3.124427 |
| C | 5.476016  | -2.467525 | 2.467976  |
| C | 5.698359  | -2.061566 | 0.066132  |
| H | 1.555675  | -5.493262 | 2.43235   |
| H | 4.190513  | -2.856794 | -3.707951 |
| C | 6.05316   | -1.673393 | -2.31666  |
| O | -0.211677 | -6.592611 | 0.899413  |
| N | 0.074965  | -6.06483  | -1.266918 |
| O | 0.208721  | -5.64433  | -3.490719 |
| H | 2.195897  | -4.228238 | -4.131331 |
| H | 5.001355  | -2.966354 | 3.298768  |
| C | 6.562593  | -1.664603 | 2.722536  |
| C | 6.820208  | -1.218697 | 0.339002  |
| H | 5.781454  | -1.833133 | -3.348104 |
| C | 7.137782  | -0.864173 | -2.046466 |
| C | 7.224757  | -0.999034 | 1.682463  |
| H | 6.952147  | -1.574964 | 3.72929   |
| C | 7.52331   | -0.624809 | -0.728247 |
| H | 7.697774  | -0.386388 | -2.83868  |
| C | 8.346295  | -0.138884 | 1.964719  |
| C | 8.683465  | 0.22618   | -0.469958 |
| N | 8.992351  | 0.396296  | 0.887552  |
| O | 8.743553  | 0.155807  | 3.11898   |
| O | 9.366779  | 0.777664  | -1.312689 |
| H | -0.747836 | -6.619668 | -1.461142 |
| H | 9.785888  | 0.990652  | 1.084653  |

|   |           |           |           |
|---|-----------|-----------|-----------|
| N | -1.360275 | -5.801967 | 3.102122  |
| H | -2.13511  | -5.155882 | 2.672314  |
| H | -0.802143 | -5.301757 | 3.787135  |
| H | -0.754639 | -6.109897 | 2.272659  |
| H | -1.783268 | -6.620482 | 3.532351  |
| C | -3.446779 | 3.703687  | -0.475932 |
| C | -2.300951 | 4.514905  | -0.748459 |
| C | -4.146164 | 3.101033  | -1.559925 |
| C | -3.68161  | 3.310559  | -2.872667 |
| C | -3.865283 | 3.515861  | 0.876758  |
| C | -1.8717   | 4.683905  | -2.077872 |
| C | -1.608512 | 5.144484  | 0.319725  |
| C | -5.307518 | 2.2765    | -1.284937 |
| C | -2.562858 | 4.078197  | -3.124581 |
| H | -4.191457 | 2.857078  | -3.70811  |
| C | -3.152633 | 4.177554  | 1.90503   |
| C | -5.002427 | 2.678156  | 1.151051  |
| C | -0.68253  | 5.473793  | -2.381429 |
| C | -0.453918 | 5.964156  | 0.042011  |
| C | -2.06453  | 4.972806  | 1.630673  |
| C | -6.053652 | 1.673047  | -2.316789 |
| C | -5.698838 | 2.061142  | 0.065988  |
| H | -2.197079 | 4.228855  | -4.131517 |
| H | -3.461365 | 4.069941  | 2.933393  |
| C | -5.476658 | 2.467237  | 2.467841  |
| O | -0.210061 | 5.645244  | -3.490929 |
| N | -0.075625 | 6.064745  | -1.266985 |
| O | 0.211257  | 6.592016  | 0.899476  |
| H | -1.555575 | 5.492113  | 2.432369  |
| H | -5.782063 | 1.832985  | -3.348227 |
| C | -7.138053 | 0.863561  | -2.046606 |
| C | -6.820549 | 1.218098  | 0.338846  |
| H | -5.002181 | 2.96628   | 3.298616  |
| C | -6.563131 | 1.664164  | 2.722404  |
| C | -7.523481 | 0.624038  | -0.728396 |
| H | -7.697954 | 0.385683  | -2.838812 |
| C | -7.225129 | 0.99843   | 1.682302  |
| H | -6.952721 | 1.574503  | 3.729159  |
| C | -8.683332 | -0.227348 | -0.470114 |
| C | -8.346512 | 0.13812   | 1.964544  |
| N | -8.992311 | -0.397375 | 0.887384  |
| O | -9.366283 | -0.779283 | -1.31283  |
| O | -8.743886 | -0.156399 | 3.118843  |
| H | 0.74708   | 6.619723  | -1.461245 |

|   |           |           |           |
|---|-----------|-----------|-----------|
| H | -9.785661 | -0.99196  | 1.084501  |
| N | 1.361552  | 5.802291  | 3.102431  |
| H | 0.804006  | 5.302492  | 3.78823   |
| H | 0.755293  | 6.109521  | 2.273514  |
| H | 2.136468  | 5.155932  | 2.67224   |
| H | 1.784593  | 6.621257  | 3.531755  |
| C | -2.681447 | 0.104814  | -0.152224 |
| C | -3.821279 | -0.755594 | -0.093394 |
| C | -2.074449 | 0.545916  | 1.062323  |
| C | -2.595989 | 0.078079  | 2.29194   |
| C | -2.166433 | 0.489112  | -1.422483 |
| C | -4.31511  | -1.188033 | 1.166669  |
| C | -4.430764 | -1.180531 | -1.288588 |
| C | -0.92895  | 1.413751  | 1.002831  |
| C | -3.677558 | -0.769768 | 2.338873  |
| H | -2.12589  | 0.361903  | 3.220842  |
| C | -2.816049 | 0.039364  | -2.588537 |
| C | -0.977834 | 1.317484  | -1.482624 |
| C | -5.463171 | -2.060239 | 1.225591  |
| C | -5.612428 | -2.037678 | -1.255384 |
| C | -3.931713 | -0.77136  | -2.523351 |
| C | -0.295853 | 1.897083  | 2.173144  |
| C | -0.392889 | 1.778642  | -0.27023  |
| H | -4.020728 | -1.161413 | 3.28783   |
| H | -2.449208 | 0.330627  | -3.560196 |
| C | -0.382011 | 1.674191  | -2.70949  |
| O | -5.990398 | -2.496201 | 2.278413  |
| N | -6.008969 | -2.434816 | 0.032867  |
| O | -6.250062 | -2.411392 | -2.22046  |
| H | -4.427112 | -1.127686 | -3.416354 |
| H | -0.676329 | 1.623231  | 3.145312  |
| C | 0.825354  | 2.689251  | 2.10797   |
| C | 0.769116  | 2.608658  | -0.329914 |
| H | -0.80365  | 1.32471   | -3.638821 |
| C | 0.750107  | 2.461452  | -2.757894 |
| C | 1.362659  | 3.07769   | 0.873238  |
| H | 1.339777  | 2.98481   | 3.01418   |
| C | 1.327088  | 2.936474  | -1.579189 |
| H | 1.205777  | 2.742098  | -3.697746 |
| C | 2.542664  | 3.896744  | 0.817908  |
| C | 2.544058  | 3.739268  | -1.660648 |
| N | 3.054325  | 4.15433   | -0.418674 |
| O | 3.110594  | 4.40127   | 1.826794  |
| O | 3.119043  | 4.063484  | -2.683018 |

|   |           |           |          |
|---|-----------|-----------|----------|
| H | -6.840848 | -3.008548 | 0.073712 |
| H | 3.892936  | 4.718181  | -0.45783 |
| N | -6.663799 | -1.156836 | 4.372128 |
| H | -7.545426 | -0.678031 | 3.990327 |
| H | -6.002175 | -0.460158 | 4.701916 |
| H | -6.249208 | -1.708796 | 3.527891 |
| H | -6.905255 | -1.79509  | 5.125618 |

HS state

|   |           |           |           |
|---|-----------|-----------|-----------|
| C | -2.438077 | 0.404859  | 0.376262  |
| C | -3.560544 | -0.407421 | 0.723752  |
| C | -1.643129 | 0.979682  | 1.414001  |
| C | -2.029879 | 0.77266   | 2.76036   |
| C | -2.13172  | 0.61931   | -0.998442 |
| C | -3.87393  | -0.627533 | 2.089235  |
| C | -4.339502 | -0.98976  | -0.297318 |
| C | -0.47759  | 1.744728  | 1.064902  |
| C | -3.112093 | -0.011026 | 3.088074  |
| H | -1.477312 | 1.246281  | 3.557558  |
| C | -2.956971 | 0.035864  | -1.978233 |
| C | -0.972895 | 1.41958   | -1.349008 |
| C | -4.996933 | -1.454526 | 2.445908  |
| C | -5.470275 | -1.846018 | 0.037102  |
| C | -4.034407 | -0.757284 | -1.637808 |
| C | 0.40524   | 2.251218  | 2.048876  |
| C | -0.166399 | 1.965158  | -0.311689 |
| H | -3.395157 | -0.168512 | 4.120653  |
| H | -2.752757 | 0.189552  | -3.026324 |
| C | -0.599598 | 1.64212   | -2.688521 |
| O | -5.356422 | -1.692598 | 3.623427  |
| N | -5.714033 | -1.987981 | 1.405424  |
| O | -6.189307 | -2.428689 | -0.761723 |
| H | -4.654032 | -1.214959 | -2.397864 |
| H | 0.237132  | 2.027009  | 3.09046   |
| C | 1.522266  | 2.975927  | 1.713139  |
| C | 0.998273  | 2.72033   | -0.65618  |
| H | -1.195478 | 1.235683  | -3.490903 |
| C | 0.533902  | 2.357978  | -3.012227 |
| C | 1.82584   | 3.253157  | 0.371377  |
| H | 2.213717  | 3.28216   | 2.48672   |
| C | 1.336872  | 2.898864  | -2.009232 |
| H | 0.83135   | 2.509547  | -4.041305 |
| C | 3.017017  | 3.964995  | 0.016988  |

|   |           |           |           |
|---|-----------|-----------|-----------|
| C | 2.583113  | 3.563113  | -2.383083 |
| N | 3.315511  | 4.076026  | -1.303904 |
| O | 3.821006  | 4.492302  | 0.848814  |
| O | 3.015842  | 3.676417  | -3.51499  |
| H | -6.447195 | -2.64511  | 1.629857  |
| H | 4.212769  | 4.483028  | -1.535605 |
| N | -8.009584 | -1.145747 | 3.88418   |
| H | -8.572797 | -1.950724 | 4.146596  |
| H | -6.993509 | -1.419143 | 3.853149  |
| H | -8.354502 | -0.771738 | 2.832856  |
| H | -8.137849 | -0.424291 | 4.588608  |
| C | -3.241072 | 3.996328  | -0.352802 |
| C | -2.052581 | 4.786536  | -0.297448 |
| C | -3.769328 | 3.621937  | -1.621451 |
| C | -3.114967 | 4.061061  | -2.78677  |
| C | -3.8619   | 3.581631  | 0.864875  |
| C | -1.417035 | 5.174953  | -1.49578  |
| C | -1.510997 | 5.152733  | 0.959385  |
| C | -4.943317 | 2.77046   | -1.676651 |
| C | -1.958303 | 4.814707  | -2.725387 |
| H | -3.497829 | 3.794348  | -3.759508 |
| C | -3.287055 | 3.984188  | 2.0921    |
| C | -5.028337 | 2.742068  | 0.807503  |
| C | -0.173957 | 5.939855  | -1.460084 |
| C | -0.283635 | 5.9112    | 1.027185  |
| C | -2.141436 | 4.746326  | 2.137372  |
| C | -5.498072 | 2.347738  | -2.901449 |
| C | -5.534849 | 2.325071  | -0.461754 |
| H | -1.442488 | 5.127219  | -3.62355  |
| H | -3.728095 | 3.669462  | 3.024822  |
| C | -5.692849 | 2.304397  | 1.979079  |
| O | 0.4672    | 6.309456  | -2.428668 |
| N | 0.282755  | 6.254747  | -0.174119 |
| O | 0.263017  | 6.254903  | 2.094987  |
| H | -1.700419 | 5.035573  | 3.081606  |
| H | -5.074919 | 2.684664  | -3.834949 |
| C | -6.576837 | 1.49216   | -2.944888 |
| C | -6.652564 | 1.433375  | -0.515309 |
| H | -5.357822 | 2.640825  | 2.94756   |
| C | -6.757369 | 1.441547  | 1.923087  |
| C | -7.152571 | 1.021365  | -1.763602 |
| H | -6.996889 | 1.160369  | -3.884846 |
| C | -7.240203 | 0.96186   | 0.693643  |
| H | -7.248086 | 1.143212  | 2.839419  |

|   |           |           |           |
|---|-----------|-----------|-----------|
| C | -8.28127  | 0.10051   | -1.844474 |
| C | -8.311001 | 0.017649  | 0.629353  |
| N | -8.770842 | -0.323031 | -0.602622 |
| O | -8.805818 | -0.301702 | -2.867363 |
| O | -8.884559 | -0.529011 | 1.625152  |
| H | 1.132701  | 6.800151  | -0.152315 |
| H | -9.50885  | -1.012373 | -0.638659 |
| N | 2.864478  | 5.885538  | 2.722756  |
| H | 3.293109  | 5.196451  | 1.919869  |
| H | 3.409087  | 6.742761  | 2.769817  |
| H | 1.866035  | 6.107539  | 2.471946  |
| H | 2.882326  | 5.435163  | 3.633874  |
| C | 3.241966  | -3.996904 | -0.351163 |
| C | 2.053474  | -4.78712  | -0.295933 |
| C | 3.861723  | -3.580791 | 0.866586  |
| C | 3.285989  | -3.982196 | 2.093777  |
| C | 3.771251  | -3.623865 | -1.619777 |
| C | 1.510888  | -5.151998 | 0.960859  |
| C | 1.418974  | -5.176912 | -1.494353 |
| C | 5.027986  | -2.740967 | 0.809265  |
| C | 2.140413  | -4.744395 | 2.138929  |
| H | 3.726257  | -3.666459 | 3.026522  |
| C | 3.118007  | -4.064493 | -2.785171 |
| C | 4.945072  | -2.772143 | -1.674934 |
| C | 0.283559  | -5.910454 | 1.028443  |
| C | 0.175916  | -5.941833 | -1.458861 |
| C | 1.961366  | -4.818169 | -2.723916 |
| C | 5.691268  | -2.301642 | 1.980915  |
| C | 5.535454  | -2.325232 | -0.46003  |
| H | 1.698682  | -5.032695 | 3.083113  |
| H | 3.501801  | -3.799012 | -3.757881 |
| C | 5.500636  | -2.350483 | -2.899727 |
| O | -0.263685 | -6.253368 | 2.096253  |
| N | -0.282044 | -6.255028 | -0.172894 |
| O | -0.464242 | -6.312839 | -2.427556 |
| H | 1.446429  | -5.131877 | -3.622165 |
| H | 5.355425  | -2.63695  | 2.949502  |
| C | 6.755475  | -1.438395 | 1.924861  |
| C | 6.652876  | -1.433167 | -0.513625 |
| H | 5.078324  | -2.688491 | -3.833217 |
| C | 6.579115  | -1.494531 | -2.943198 |
| C | 7.239262  | -0.960018 | 0.695295  |
| H | 7.245099  | -1.138614 | 2.841308  |
| C | 7.153735  | -1.022295 | -1.761952 |



|   |           |           |           |
|---|-----------|-----------|-----------|
| H | 6.999767  | -1.163538 | -3.883169 |
| C | 8.3097    | -0.01538  | 0.630851  |
| C | 8.28209   | -0.101019 | -1.842892 |
| N | 8.770482  | 0.324059  | -0.6011   |
| O | 8.88212   | 0.532705  | 1.626507  |
| O | 8.807232  | 0.300387  | -2.865787 |
| H | -1.131911 | -6.800558 | -0.151228 |
| H | 9.508104  | 1.013807  | -0.637287 |
| N | -2.864036 | -5.885573 | 2.725319  |
| H | -3.408623 | -6.742804 | 2.77251   |
| H | -1.865687 | -6.107288 | 2.473124  |
| H | -3.293359 | -5.196426 | 1.924003  |
| H | -2.880753 | -5.435671 | 3.636696  |
| C | 2.437653  | -0.404856 | 0.377652  |
| C | 3.559789  | 0.408122  | 0.724616  |
| C | 2.132089  | -0.621276 | -0.996923 |
| C | 2.95782   | -0.039111 | -1.977091 |
| C | 1.642296  | -0.978459 | 1.415762  |
| C | 4.339169  | 0.989204  | -0.296844 |
| C | 3.872407  | 0.630174  | 2.089978  |
| C | 0.973503  | -1.422096 | -1.347003 |
| C | 4.034873  | 0.754771  | -1.637189 |
| H | 2.754445  | -0.194591 | -3.025085 |
| C | 2.028353  | -0.769583 | 2.762041  |
| C | 0.477008  | -1.744111 | 1.067097  |
| C | 5.469685  | 1.846005  | 0.036981  |
| C | 4.994985  | 1.457948  | 2.446096  |
| C | 3.110199  | 0.014816  | 3.089261  |
| C | 0.600831  | -1.646352 | -2.686402 |
| C | 0.16647   | -1.966286 | -0.309357 |
| H | 4.654883  | 1.211441  | -2.397537 |
| H | 1.475432  | -1.242171 | 3.559608  |
| C | -0.406184 | -2.24949  | 2.051307  |
| O | 6.189242  | 2.42747   | -0.762257 |
| N | 5.712508  | 1.990123  | 1.405249  |
| O | 5.353808  | 1.697785  | 3.623484  |
| H | 3.392662  | 0.173797  | 4.121778  |
| H | 1.19712   | -1.240998 | -3.489027 |
| C | -0.532639 | -2.362449 | -3.009722 |
| C | -0.998141 | -2.721729 | -0.653432 |
| H | -0.238439 | -2.024143 | 3.092704  |
| C | -1.523188 | -2.974438 | 1.715941  |
| C | -1.336187 | -2.901877 | -2.006423 |
| H | -0.829633 | -2.515261 | -4.038745 |

|   |           |           |           |
|---|-----------|-----------|-----------|
| C | -1.826288 | -3.253056 | 0.374394  |
| H | -2.21502  | -3.27979  | 2.489542  |
| C | -2.582575 | -3.566047 | -2.379991 |
| C | -3.01777  | -3.964751 | 0.020431  |
| N | -3.315644 | -4.077397 | -1.300519 |
| O | -3.014904 | -3.680435 | -3.511939 |
| O | -3.822231 | -4.490451 | 0.852657  |
| H | 6.445539  | 2.647585  | 1.629134  |
| H | -4.213202 | -4.483836 | -1.532074 |
| N | 8.006929  | 1.151002  | 3.885003  |
| H | 8.351726  | 0.776195  | 2.833954  |
| H | 8.570374  | 1.956008  | 4.146835  |
| H | 6.990916  | 1.424589  | 3.85386   |
| H | 8.135075  | 0.429978  | 4.589897  |
